# Supplementary material for: Health-related quality of life after catheter-directed thrombolysis for deep vein thrombosis: secondary outcomes of the randomised, non-blinded, parallel-group CaVenT study
Source: PubMed Central journal article supplement — BMJ Open. 2013 Aug 28;3(8):e002984. doi: 10.1136/bmjopen-2013-002984 (PMC3758969; doi:10.1136/bmjopen-2013-002984), 2013-08-28
Supplement: bmjopen-2013-002984.draft_revisions.pdf [file bmjopen-2013-002984.draft_revisions.pdf]

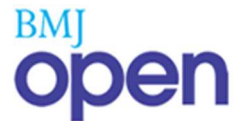

**Health-related quality of life after catheter-directed thrombolysis for deep vein thrombosis; from the CaVenT study (an open RCT)**

|                                 |                                                                                                                                                                                                                                                                                                                                                                                                                                                                                                                                                                                                                                                    |
|---------------------------------|----------------------------------------------------------------------------------------------------------------------------------------------------------------------------------------------------------------------------------------------------------------------------------------------------------------------------------------------------------------------------------------------------------------------------------------------------------------------------------------------------------------------------------------------------------------------------------------------------------------------------------------------------|
| Journal:                        | <i>BMJ Open</i>                                                                                                                                                                                                                                                                                                                                                                                                                                                                                                                                                                                                                                    |
| Manuscript ID:                  | bmjopen-2013-002984                                                                                                                                                                                                                                                                                                                                                                                                                                                                                                                                                                                                                                |
| Article Type:                   | Research                                                                                                                                                                                                                                                                                                                                                                                                                                                                                                                                                                                                                                           |
| Date Submitted by the Author:   | 02-Apr-2013                                                                                                                                                                                                                                                                                                                                                                                                                                                                                                                                                                                                                                        |
| Complete List of Authors:       | Enden, Tone; Oslo University Hospital, Radiology<br>Wik, Hilde; Oslo University Hospital Rikshospitalet, Department of Haematology; University of Oslo, Institute of Clinical Medicine<br>Kvam, Ann Kristin; Oslo University Hospital Rikshospitalet, Department of Haematology<br>Haig, Ylva; Oslo University Hospital, Radiology; University of Oslo, Institute of Clinical Medicine<br>Kløw, Nils-Einar; Oslo University Hospital, Radiology; University of Oslo, Institute of Clinical Medicine<br>Sandset, Per Morten; Oslo University Hospital Rikshospitalet, Department of Haematology; University of Oslo, Institute of Clinical Medicine |
| <b>Primary Subject Heading</b>: | Cardiovascular medicine                                                                                                                                                                                                                                                                                                                                                                                                                                                                                                                                                                                                                            |
| Secondary Subject Heading:      | Haematology (incl blood transfusion), Patient-centred medicine                                                                                                                                                                                                                                                                                                                                                                                                                                                                                                                                                                                     |
| Keywords:                       | Bleeding disorders & coagulopathies < HAEMATOLOGY, Vascular medicine < INTERNAL MEDICINE, Interventional radiology < RADIOLOGY & IMAGING                                                                                                                                                                                                                                                                                                                                                                                                                                                                                                           |
|                                 |                                                                                                                                                                                                                                                                                                                                                                                                                                                                                                                                                                                                                                                    |

## Health-related quality of life after catheter-directed thrombolysis for deep vein thrombosis; from the CaVenT study (an open RCT)

Tone Enden\*†, Hilde Skuterud Wik\*§, Ann Kristin Kvam\*, Ylva Haig†§, Nils Einar Kløw†§, Per Morten Sandset\*§

\*Department of haematology, Oslo University Hospital, Oslo, Norway

†Department of radiology, Oslo University Hospital, Oslo, Norway

§Institute of Clinical Medicine, University of Oslo, Oslo, Norway

Corresponding author: Tone Enden, Department of radiology, Oslo University Hospital, Postboks 4950

Nydalen, 0424 OSLO, Norway, phone +47 915 02770, fax +47 22 11 92 40

**Keywords:** health outcomes, post-thrombotic syndrome, quality of life, venous thrombosis, thrombolytic therapy

Word count: 2309 words in main text

## Summary:

Objectives: To investigate whether additional catheter-directed thrombolysis (CDT) improves long-term patient reported quality of life (QOL) compared to standard treatment with anticoagulation and compression stockings alone in patients with proximal deep vein thrombosis (DVT).

Design: Open-label randomised controlled trial.

Setting: 19 hospitals in the Norwegian southeastern health region.

Participants: Patients (18-75 years) with a high proximal DVT, symptoms <21 days, and no increased risk of bleeding were eligible. 189 of 209 recruited patients completed 24 months follow-up.

Interventions: Participants were randomized to additional CDT with alteplase for 1-4 days or to standard treatment only with 6 months anticoagulation and 24 months of compression stockings.

Primary and secondary outcome measures: Planned secondary outcome measures included QOL as assessed with the generic instrument EQ-5D and the disease specific instrument VEINES-QOL/Sym.

Primary outcome measure was post-thrombotic syndrome (PTS) after 24 months.

Results: After 24 months there were no differences in QOL between the additional CDT and standard treatment arms; EQ-5D index was 0.80 (95% CI 0.746-0.849) and 0.84 (95% CI 0.807-0.875), VEINES-QOL score was 50.1 (95% CI 47.9-52.3) and 49.9 (95% CI 48.0-51.8), and VEINES-Sym score was 50.3 (95% CI 48.0-52.5) and 49.8 (95% CI 47.9-51.6), respectively (p-values >0.37). Independent of treatment arms, patients with PTS had poorer outcomes than patient without PTS; EQ-5D index was 0.77 (95% CI 0.730-0.819) vs. 0.86 (95% CI 0.823-0.903), VEINES-QOL score was 45.6 (95% CI 43.4-47.9) vs. 54.2 (95% CI 52.8-55.6), and VEINES-Sym score was 45.0 (95% CI 42.7-47.2) vs. 54.8 (95% CI 53.5-56.0), respectively (p-values <0.001).

Conclusions: QOL did not differ between patients treated with additional CDT compared to standard treatment alone. Patients who developed PTS reported poorer QOL and more symptoms than patients without PTS. QOL should be included as an outcome measure in clinical studies on patients at risk of PTS.

Trial registration: NCT00251771

## Article summary

### Article Focus

- Assessment of patient reported quality of life may provide meaningful information not captured by clinical scores and other traditional health outcome measures.
- Additional catheter-directed thrombolysis for proximal deep vein thrombosis improves long-term clinical outcome by reducing post-thrombotic syndrome and is likely to be a cost-effective alternative to standard treatment alone.
- Our objective was to investigate whether additional thrombolysis also improves long-term quality of life compared to standard treatment alone.

### Key Messages

- Quality of life did not differ between patients allocated thrombolytic therapy compared to control patients who receive standard anticoagulation and compression stockings only.
- Patients who developed post-thrombotic syndrome had poorer generic and disease specific quality of life scores compared to patients without post-thrombotic syndrome.
- Quality of life assessment should be among the long-term outcome measures in clinical research on patients who are at risk of developing post-thrombotic syndrome.

### Strengths and Limitations

- A robust study design where patient reported quality of life was assessed using validated generic and disease-specific instruments within the setting of a multicenter open-label randomized controlled trial.
- The study was designed to detect a difference in the frequency of post-thrombotic syndrome between the two treatment arms and may have been underpowered to detect a clinically meaningful difference in quality of life.
- More longitudinal assessments of quality of life would have allowed for better explanatory analyses, and may have added to the interpretation of clinically meaningful differences in the disease specific quality of life scores.

## Introduction

Following standard treatment including anticoagulation and compression stockings, still at least 1 in 4 are at risk of developing a post-thrombotic syndrome (PTS) after suffering a proximal deep vein thrombosis (DVT) [1-3]. PTS is characterized by persistent pain, heaviness, swelling, and deterioration of the skin. Previously in the CaVenT Study we have shown that additional catheter-directed thrombolysis (CDT) in patients with high proximal DVT and low risk of bleeding, reduced the frequency of PTS from 56% to 41% ( $p=0.047$ ) after 2 years and that CDT is likely to be a cost-effective alternative to standard treatment only [4,5]. However, as PTS is a chronic condition associated with substantial morbidity and with no healing treatment options, patient reported assessment of both generic and disease-specific health-related quality of life (QOL) including the impact on health and daily functioning may provide meaningful information not captured by clinical scores and other traditional health outcome measures. Development of PTS has been shown to be a principal determinant of QOL following DVT of the lower limb; however, there is currently no gold standard for the PTS diagnosis [6]. We aimed at investigating whether additional CDT for a high proximal DVT improved long-term QOL compared to standard treatment alone.

## Materials and methods

### Study population

Patients were recruited as part of the CaVenT study, an open randomized controlled trial (RCT), from 19 hospitals within the South-Eastern Norway Regional Health Authority, which serves a population of 2.6 million people. Patients aged 18–75 years with a first-time objectively verified acute high proximal DVT, defined as thrombus in mid-thigh level or higher, and with a low risk of bleeding, were eligible for inclusion if symptoms had lasted <21 days. Complete eligibility criteria and trial profile have been

1  
2  
3 reported previously [5,7]. Patients were randomly assigned, using sealed numbered envelopes, to  
4  
5 standard treatment with at least 6 months of anticoagulation and compression stockings for 24 months  
6  
7 or to CDT with alteplase for 1-4 days in addition to standard treatment; the treatment strategies have  
8  
9 previously been reported in detail [5,8]. Prior to treatment allocation, written informed consent was  
10  
11 obtained by the local trial site investigator. The study protocol was approved by the Regional Committee  
12  
13 for Medical and Health Research Ethics and the Norwegian Medicines Agency, and was registered at  
14  
15 [www.clinicaltrials.gov](http://www.clinicaltrials.gov) with the unique trial identifier NCT00251771.  
16  
17  
18  
19

## 20 **Variables and instruments**

### 21 **Long-term quality of life**

22  
23  
24  
25 After 6 and 24 months follow-up the patients completed a self-reporting questionnaire including the  
26  
27 validated Norwegian versions of the generic instrument EQ-5D ([www.euroqol.org](http://www.euroqol.org)) and the disease-  
28  
29 specific QOL instrument VEINES-QOL/Sym [9,10]. The VEINES-QOL/Sym comprises 26 items regarding  
30  
31 problems of the lower limbs [4]. The instrument measures symptoms, limitations in daily activity and  
32  
33 psychological impact during the previous 4 weeks, and change over the past year. Responses are rated  
34  
35 on 2- to 7-point descriptive scales, and two summary scores are computed. The VEINES-QOL summary  
36  
37 score assesses QOL, and the VEINES-Sym score is a subscale that measures symptom severity only.  
38  
39 Higher scores represent better QOL and/or fewer symptoms, and a difference or change of  $\geq 4$  points has  
40  
41 been suggested to represent a clinically meaningful difference [10].  
42  
43  
44  
45  
46

47 The EQ-5D is a preference-based generic instrument for describing and valuing QOL, and is a widely used  
48  
49 health measure outcome in clinical trials and cost-effectiveness and cost-utility analyses. This descriptive  
50  
51 classification system comprises the five items mobility, self-care, activity, pain, and anxiety; each with  
52  
53 the three levels reflecting the patient's status that particular day. The scoring gives a single  
54  
55  
56  
57  
58  
59  
60

1  
2  
3 number/health status index ranging from 0 (dead) to 1 (best possible health). A difference or change in  
4  
5 this index of  $\geq 0.08$  is likely to represent a clinically meaningful difference [11,12].  
6  
7

### 8 9 **Assessment of post-thrombotic syndrome**

10  
11 In the absence of a gold standard for a PTS diagnosis, the Villalta score has been recommended for PTS  
12  
13 assessment in clinical trials [13]. This score includes the five patient-rated symptoms pain, cramps,  
14  
15 heaviness, paresthesia, pruritus, and the six clinician-rated signs edema, skin induration,  
16  
17 hyperpigmentation, pain during calf compression, venous ectasia, and redness. Each sign or symptom is  
18  
19 rated as 0 (none), 1 (mild), 2 (moderate), or 3 (severe), and summed to produce a total score, where less  
20  
21 than 5 indicates no PTS, 5–14 indicates mild or moderate PTS, and 15 or more (or presence of venous  
22  
23 ulcer) indicates severe PTS.  
24  
25  
26  
27

### 28 29 **Statistical analysis and sample size**

30  
31 Health related QOL was among the pre-specified secondary outcomes of the CaVenT Study, while the  
32  
33 primary outcome of PTS after 2 years was the basis for the sample size calculation [7]. For all patients a  
34  
35 EQ-5D summary index was calculated based on values from a Danish population as no Norwegian  
36  
37 algorithm exists [14]. Scores for VEINES-QOL and VEINES-Sym were computed using standard scoring  
38  
39 algorithms obtained from the authors [10]. Statistical analyses were by intention to treat. When  
40  
41 comparing dichotomous variables between groups, a two-sided chi-square test was used. Normal  
42  
43 distribution was tested visually using plots, followed by comparing non-normally distributed continuous  
44  
45 variables between independent groups with a two-sided Mann-Whitney U test. Findings with p-values  
46  
47 less than 0.05 were deemed statistically significant. The statistical analyses were performed using the  
48  
49 statistical package SPSS, version 18.0 (SPSS Inc, Chicago, IL, USA).  
50  
51  
52  
53  
54  
55  
56  
57  
58  
59  
60

## Results

209 patients with a high proximal DVT were recruited and randomized to additional CDT or to standard treatment alone during 2006-2009. Table 1 shows the demographic and clinical characteristics of the 189 patients with complete 2 years follow-up included in the present analysis; 90 in the CDT group and 99 controls. Mean age was 51.5 years (SD 15.8) and 70 (37%) participants were female. Mean duration of symptoms before diagnosis and start of treatment was 6.6 days (SD 4.6). Most baseline demographic and clinical characteristics, including VEINES-QOL/Sym and EQ-5D scores, were fairly equally distributed between the two treatment groups. Details on the study participants including the complete trial profile have been reported elsewhere [5].



Table 1 Demographic and clinical characteristics

|                                                        | Adjunctive catheter-directed thrombolysis (n=90) |        | Standard treatment only (n=99) |        |
|--------------------------------------------------------|--------------------------------------------------|--------|--------------------------------|--------|
| Baseline                                               |                                                  |        |                                |        |
| Age (years)                                            | 53.3                                             | (15.7) | 50.0                           | (15.8) |
| Women                                                  | 32                                               | (35.6) | 38                             | (38.4) |
| Duration of symptoms of acute DVT (days)               | 6.4                                              | (4.4)  | 6.8                            | (4.8)  |
| EQ-5D index                                            | 0.46 (0.372-0.548)                               |        | 0.63 (0.422-0.844)             |        |
| VEINES-QOL score                                       | 50.2 (48.2-52.3)                                 |        | 50.1 (47.8-52.4)               |        |
| VEINES-Sym score                                       | 50.4 (48.4-52.5)                                 |        | 49.5 (47.2-51.8)               |        |
| No risk factor for venous thrombosis                   | 31                                               | (34.4) | 26                             | (26.3) |
| Transient risk factors for venous thrombosis           |                                                  |        |                                |        |
| Surgery previous 3 months                              | 15                                               | (16.7) | 13                             | (13.1) |
| Trauma previous 3 months                               | 10                                               | (11.1) | 15                             | (15.2) |
| Short term immobility                                  | 20                                               | (22.2) | 19                             | (19.2) |
| Infection previous 6 weeks                             | 6                                                | (6.7)  | 9                              | (9.1)  |
| Pregnancy previous 3 months                            | 5                                                | (5.6)  | 3                              | (3.0)  |
| Hormonal replacement therapy                           | 4                                                | (4.4)  | 6                              | (6.1)  |
| Oral contraceptive pill                                | 3                                                | (3.3)  | 11                             | (11.1) |
| Permanent risk factors for venous thrombosis           |                                                  |        |                                |        |
| Previous venous thrombosis                             | 9                                                | (10.0) | 9                              | (9.1)  |
| Cancer                                                 | 3                                                | (3.3)  | 1                              | (1.0)  |
| Obesity                                                | 9                                                | (10.0) | 11                             | (11.1) |
| Inflammatory bowel disease                             | 0                                                | (0.0)  | 3                              | (3.0)  |
| 1 <sup>st</sup> degree relative with venous thrombosis | 9                                                | (10.0) | 13                             | (13.1) |
| Two risk factors for venous thrombosis                 | 26                                               | (28.9) | 18                             | (18.2) |
| Three risk factors for venous thrombosis               | 10                                               | (11.1) | 14                             | (14.1) |
| Thrombophilia                                          |                                                  |        |                                |        |
| Heterozygous F5 6025 polymorphism                      | 23                                               | (25.6) | 22                             | (22.2) |
| Homozygous F5 6025 polymorphism                        | 1                                                | (1.1)  | 4                              | (4.0)  |
| Other thrombophilic factor(s)                          | 15                                               | (16.7) | 13                             | (13.1) |
| At 24 months follow-up                                 |                                                  |        |                                |        |
| Daily wear of compression stockings class II           | 57                                               | (63.3) | 51                             | (51.5) |
| Recurrent venous thromboembolism                       | 10                                               | (11.1) | 18                             | (18.2) |
| Diagnosed with cancer                                  | 4                                                | (4.4)  | 7                              | (7.1)  |

DVT=deep vein thrombosis. Data are mean (SD) for time, mean (95% CI) for scores, or n (%)

There were no differences between the two treatments groups in mean generic QOL scores, disease-specific QOL scores, or symptom severity score after 24 months follow-up (Table 2). Both VEINES-QOL and VEINES-Sym scores obtained at 6 months follow-up were higher in the CDT arm compared to control patients ( $p=0.048$  and  $p=0.016$ , respectively), however, the differences of 3.2 and 2.4 points, respectively, were below the  $\geq 4$  points cut-off for a clinically meaningful difference. The 6 months' EQ-5D score did not differ between the treatment groups.

Table 2 Generic and disease-specific quality of life and symptom severity according to treatment allocation

|                      |            | Additional catheter-directed thrombolysis (n=90) | Standard treatment only (n=99) | P-value* |
|----------------------|------------|--------------------------------------------------|--------------------------------|----------|
| 24 months            |            |                                                  |                                |          |
| Generic QOL          | EQ-5D      | 0.80 (0.746-0.849)                               | 0.84 (0.807-0.875)             | 0.705    |
| Disease-specific QOL | VEINES-QOL | 50.1 (47.9-52.3)                                 | 49.9 (48.0-51.8)               | 0.595    |
|                      | VEINES-Sym | 50.3 (48.0-52.5)                                 | 49.8 (47.9-51.6)               | 0.368    |
| 6 months             |            |                                                  |                                |          |
| Generic QOL          | EQ-5D      | 0.82 (0.780-0.856)                               | 0.81 (0.777-0.852)             | 0.893    |
| Disease-specific QOL | VEINES-QOL | 51.3 (49.2-53.4)                                 | 48.9 (46.8-50.9)               | 0.048    |
|                      | VEINES-Sym | 51.7 (49.8-53.7)                                 | 48.5 (46.4-50.6)               | 0.016    |

Data are mean scores (95% CI). \*Mann Whitney U test

Independent of treatment allocation, the mean VEINES-QOL and VEINES-Sym scores were lower in patients who developed PTS compared to patients without PTS at both 6 and 24 months follow-up ( $p$ -values  $<0.001$ ) (Table 3). The differences were 6.0 points after 6 month, and increased to 8.6 and 9.8 points, respectively, after 24 months. The mean EQ-5D index was 0.09 points lower in PTS patients at 24 months follow-up ( $p<0.001$ ); however, there was no difference after 6 months. When looking at the PTS cases only at 24 months follow-up the three scores did not differ between the two treatment groups ( $p>0.8$ , data not shown).

Table 3 Generic and disease-specific quality of life and symptom severity according to PTS development

|                      |            | PTS (n=92)         | No PTS (n=97)      | P-value* |
|----------------------|------------|--------------------|--------------------|----------|
| 24 months            |            |                    |                    |          |
| Generic QOL          | EQ-5D      | 0.77 (0.730-0.819) | 0.86 (0.823-0.903) | <0.001   |
| Disease-specific QOL | VEINES-QOL | 45.6 (43.4-47.9)   | 54.2 (52.8-55.6)   | <0.001   |
|                      | VEINES-Sym | 45.0 (42.7-47.2)   | 54.8 (53.5-56.0)   | <0.001   |
| 6 months             |            |                    |                    |          |
| Generic QOL          | EQ-5D      | 0.80 (0.770-0.837) | 0.82 (0.788-0.869) | 0.062    |
| Disease-specific QOL | VEINES-QOL | 46.8 (44.6-49.0)   | 53.0 (51.3-54.7)   | <0.001   |
|                      | VEINES-Sym | 46.9 (44.6-49.1)   | 53.0 (51.4-54.6)   | <0.001   |

Data are mean scores (95% CI). \* Mann Whitney U test

Looking at individual items concerning problems with mobility (EQ-5D) and limitations in daily activities at home, work or during leisure time (VEINES-QOL) there was no differences between the two treatment groups; however patients with PTS reported more problems and limitations than patients without PTS (data not shown).

The proportions of patients that reported clinically meaningful changes over time during the 6 to 24 months follow-up did not differ between the two treatment groups with regards to the two QOL scores, and the majority of patients reported no QOL change (table 4). In both groups 1 in 5 patients reported worsening of the Sym score, and 32% of control patients reported improved symptom severity compared to 16% treated with CDT (p=0.029).

Table 4 Changes in generic and disease-specific quality of life and symptom severity during 6 to 24 months follow-up\*

|                      |                     | Additional catheter-directed thrombolysis (n=90) |                  | Standard treatment only (n=99) |                  | P-value** |
|----------------------|---------------------|--------------------------------------------------|------------------|--------------------------------|------------------|-----------|
|                      |                     | n                                                | % (95% CI)       | n                              | % (95% CI)       |           |
| Generic QOL          | EQ-5D improved      | 15                                               | 16.7 (10.0-24.4) | 24                             | 24.5 (16.6-33.4) | 0.233     |
|                      | EQ-5D worsened      | 22                                               | 24.4 (16.4-34.1) | 16                             | 16.3 (9.9-24.4)  |           |
| Disease-specific QOL | VEINES-QOL improved | 17                                               | 19.5 (11.8-28.0) | 27                             | 27.3 (19.2-36.7) | 0.462     |
|                      | VEINES-QOL worsened | 19                                               | 21.8 (13.6-30.4) | 19                             | 19.2 (12.3-27.8) |           |
|                      | VEINES-Sym improved | 14                                               | 15.9 (9.1-24.2)  | 32                             | 32.3 (23.7-42.0) | 0.029     |
|                      | VEINES-Sym worsened | 20                                               | 22.7 (14.5-31.7) | 21                             | 21.2 (14.0-30.1) |           |
|                      |                     | PTS (n=92)                                       |                  | No PTS (n=97)                  |                  | P-value*  |
|                      |                     | n                                                | % (95% CI)       | n                              | % (95% CI)       |           |
| Generic QOL          | EQ-5D improved      | 15                                               | 16.5 (9.8-24.9)  | 24                             | 24.7 (16.9-34.0) | 0.041     |
|                      | EQ-5D worsened      | 25                                               | 27.5 (18.8-36.9) | 13                             | 13.4 (7.7-21.3)  |           |
| Disease-specific QOL | VEINES-QOL improved | 21                                               | 23.3 (15.1-32.2) | 23                             | 24.0 (16.1-32.9) | 0.017     |
|                      | VEINES-QOL worsened | 26                                               | 28.9 (19.8-38.1) | 12                             | 12.5 (6.9-20.1)  |           |
|                      | VEINES-Sym improved | 20                                               | 22.0 (14.2-31.0) | 26                             | 27.1 (18.7-36.3) | 0.017     |
|                      | VEINES-Sym worsened | 28                                               | 30.8 (21.7-40.4) | 12                             | 13.5 (7.7-21.3)  |           |

\*A meaningful change was defined as  $\geq 4$  points for VEINES-QOL/Sym scores and  $\geq 0.08$  for the EQ-5D index; improvement or worsening below this was registered as no change. \*\*chi-square test

Correspondingly, when comparing proportions with meaningful changes in the three different scores during follow-up in patients with and without development of PTS independent of treatment allocation, the EQ-5D and VEINES-QOL scores worsened in nearly 30% of patients with PTS compared to 13% of patients who did not develop PTS ( $p=0.041$  and  $p=0.017$ , respectively)(table 4). Finally, 31% patients with PTS reported worsening of the Sym score compared to 14% of patients without PTS ( $p=0.017$ ).

## Discussion

We have previously shown that after a high proximal DVT additional CDT reduces the frequency of PTS [5]. Nevertheless, in the present report we found no differences in long-term QOL between patients

1  
2  
3 treated with additional CDT compared to patients who received standard treatment with anticoagulation  
4  
5 and compression stockings alone. However, patients who developed PTS after 24 months reported  
6  
7 poorer QOL with both EQ-5D and VEINES-QOL, and more symptoms on Sym score compared to patients  
8  
9 without PTS. This finding is in line with other reports, and the VEINES-QOL/Sym scores were in similar  
10  
11 ranges as previously reported in DVT populations [6,15-17].  
12  
13

14  
15 To our knowledge we are the first to investigate QOL after CDT in a well-designed study using validated  
16  
17 QOL instruments and PTS assessment. We have recently in a retrospective study of 71 patients  
18  
19 previously treated with CDT shown that VEINES-QOL/Sym scores were poorer in patients with  
20  
21 established PTS compared to no PTS (median) 6 years after the index DVT, and poorer in patients  
22  
23 compared to a control group without previous DVT [17]. Another retrospective study of corresponding  
24  
25 size found improved QOL and less post-thrombotic symptoms in patients treated with CDT compared to  
26  
27 similar patients treated with anticoagulation only; however, this study did not use a disease-specific QOL  
28  
29 instrument or a validated assessment of PTS [18]. This finding was not supported in our RCT, and long-  
30  
31 term QOL may not represent a significant secondary efficacy outcome after CDT.  
32  
33  
34  
35

36  
37 The baseline scores were obtained within 1-2 days following the verification of the acute DVT, and the  
38  
39 low EQ-5D scores are likely to reflect the patients' medical emergency situation at that time point. The  
40  
41 items of the VEINES instrument are concerned with "the last 4 weeks" and mean symptom duration  
42  
43 among study participants was only 6-7 days and, as indicated by the relatively better scores, the VEINES-  
44  
45 QOL/Sym baseline results are likely to reflect a longer period including time before symptom onset.  
46  
47 Finally, QOL is a more appropriate outcome for chronic conditions, and together with our lack of  
48  
49 longitudinal assessments, we did not include baseline scores in our analyses.  
50  
51  
52

53  
54 The finding that more control patients reported a meaningful improvement in the Sym score during  
55  
56 follow-up than patients treated with CDT, should be interpreted with caution as the 6 months Sym score  
57  
58  
59  
60

1  
2  
3 was higher in the CDT arm, though this difference did not reach a meaningful difference of at least 4  
4  
5 points.  
6  
7

8  
9 We regard our study population to be representative and the CDT procedure to be applicable in a clinical  
10  
11 setting [5]. However, due to the open label design, bias in patient reported outcomes like QOL cannot be  
12  
13 excluded, and it is uncertain in what direction such bias would impact the results. Finally, two ongoing  
14  
15 RCTs; the American ATTRACT study and the DUTCH CAVA trial, will provide additional data to the field of  
16  
17 QOL after CDT treatment ([www.clinicaltrials.gov](http://www.clinicaltrials.gov); NCT 00790335 and NCT 00970619).  
18  
19

20  
21 The Villalta scale has been validated and recommended for assessment of PTS [13,19], however, as no  
22  
23 gold standard exists and a relatively high frequency of PTS was found in both treatment arms, concerns  
24  
25 have been raised about the clinical benefit of CDT as shown in the CaVenT study [5,20]. The present  
26  
27 findings of poorer QOL in those who developed PTS, as obtained within an appropriately designed RCT,  
28  
29 underpin our perception that the 15% absolute reduction in PTS as assessed with the Villalta scale and  
30  
31 shown in CavenT, does represent a clinically meaningful effect of additional CDT [5].  
32  
33  
34

35  
36 It has been recommended to include QOL as part of the long-term follow-up assessment of patients at  
37  
38 risk of PTS [6], and a recent review “recommend(s) that the Villalta score combined with a venous  
39  
40 disease-specific quality-of-life questionnaire be considered as the “gold standard” for the diagnosis and  
41  
42 classification of PTS” [21]. The VEINES questionnaire would be a candidate, but such a combination must  
43  
44 be validated in properly designed studies and take into account the apparent overlap between the  
45  
46 Villalta score and the VEINES-scores; all items in the Sym score are covered in the QOL score, 2/3 of Sym  
47  
48 items are covered in Villalta, and 1/4 of the QOL items are covered in Villalta. Finally, 5 of 11 items in  
49  
50 Villalta score, i.e., the symptom rating, are in fact patient reported outcomes (PRO), and combining with  
51  
52 another patient PRO instrument should seek to avoid assessing the same thing twice over.  
53  
54  
55  
56  
57  
58  
59  
60

1  
2  
3 The generic instrument EQ-5D showed a clinically meaningful and statistically significant poorer QOL  
4  
5 measure in patients who developed PTS, indicating that this preference based questionnaire can be  
6  
7 included in studies on PTS and thereby allowing analyses on utilities and cost-effectiveness for decision  
8  
9 making [22]. However, the sample size was powered to detect a 15% reduction in PTS after additional  
10  
11 CDT, not improvement in QOL, which was among the secondary outcome measures. Accordingly, the  
12  
13 negative finding in terms of no difference in QOL between the treatment arms, may relate to the  
14  
15 sensitivity of the instruments, the prevalence of PTS, and the lack of power to detect a statistically  
16  
17 significant difference. Finally, the VEINES scores differed significantly between patients with PTS vs. no  
18  
19 PTS, and the magnitude of the mean difference was 6 points or higher. This has been reported to  
20  
21 represent meaningful differences, but a well-established definition or cut-off for a clinically meaningful  
22  
23 difference in VEINES scores is lacking, and also this limitation must be taken into account when  
24  
25 interpreting the results [10].  
26  
27  
28  
29

30  
31 In conclusion, there was no difference in long-term QOL between patients with a high proximal DVT  
32  
33 treated with additional CDT compared to those treated with anticoagulation and compression therapy  
34  
35 alone. Patients who developed PTS reported poorer QOL and more symptoms than patients without PTS.  
36  
37 This is in line with previous reports, and supports the use of QOL as an outcome measure in clinical  
38  
39 research on patients who are at risk of PTS.  
40  
41  
42  
43  
44  
45  
46  
47  
48  
49  
50  
51  
52  
53  
54  
55  
56  
57  
58  
59  
60

### Addendum: role of each author

T Enden: Design of study, acquisition of data, analysis and interpretation of data, drafting of manuscript, critical revision of manuscript, obtaining funding

H S Wik: Acquisition of data, interpretation of data, critical revision of manuscript

A K Kvam: Interpretation of data, and critical revision of manuscript

Y Haig: Acquisition of data and critical revision of manuscript

N E Kløw: Design of study, acquisition of data, critical revision of manuscript, obtaining funding

P M Sandset: Design of study, acquisition of data, critical revision of manuscript, obtaining funding

### Acknowledgements

We want to thank all study participants and study collaborators; without their contributions the CaVenT study would not have been feasible.

### Disclosure of Conflicts of Interests

The authors state that they have no conflict of interest.

### Funding

This work was funded by South-Eastern Norway Regional Health Authority, Research Council of Norway, University of Oslo and Oslo University Hospital, and the Unger-Vetlesen Medical Fund. The funding bodies played no role in the design and conduct of the study, the collection, management, analysis, interpretation and reporting of study data, or the writing or submission of the manuscript.

### Data sharing

Unpublished data from the CaVenT study are available to T Enden, Y Haig, NE Kløw and PM Sandset through authorized access to the research server at Oslo University Hospital, Ullevål



## References

- 1 Prandoni P, Lensing AW, Prins MH, Frulla M, Marchiori A, Bernardi E, et al. Below-knee elastic compression stockings to prevent the post-thrombotic syndrome: a randomized, controlled trial. *Ann Intern Med* 2004;141:249-56.
- 2 Brandjes DP, Buller HR, Heijboer H, Huisman MV, de RM, Jagt H, et al. Randomised trial of effect of compression stockings in patients with symptomatic proximal-vein thrombosis. *Lancet* 1997;349:759-62.
- 3 Kearon C, Akl EA, Comerota AJ, Prandoni P, BOUNAMEAUX H, Goldhaber SZ, et al. Antithrombotic therapy for VTE disease: Antithrombotic Therapy and Prevention of Thrombosis, 9th ed: American College of Chest Physicians Evidence-Based Clinical Practice Guidelines. *Chest* 2012;141:e419S-e494S.
- 4 Enden T, Resch S, White C, Wik HS, Klow NE, Sandset PM. Cost-Effectiveness of Additional Catheter-Directed Thrombolysis for Deep Vein Thrombosis. *J Thromb Haemost* 2013.
- 5 Enden T, Haig Y, Klow NE, Slagsvold CE, Sandvik L, Ghanima W, et al. Long-term outcome after additional catheter-directed thrombolysis versus standard treatment for acute iliofemoral deep vein thrombosis (the CaVenT study): a randomised controlled trial. *Lancet* 2012;379:31-8.
- 6 Kahn SR, Shbaklo H, Lamping DL, Holcroft CA, Shrier I, Miron MJ, et al. Determinants of health-related quality of life during the 2 years following deep vein thrombosis. *J Thromb Haemost* 2008;6:1105-12.
- 7 Enden T, Sandvik L, Klow NE, Hafsaahl G, Holme PA, Holmen LO, et al. Catheter-directed Venous Thrombolysis in acute iliofemoral vein thrombosis-the CaVenT Study: Rationale and design of a multicenter, randomized, controlled, clinical trial (NCT00251771). *Am Heart J* 2007;154:808-14.
- 8 Enden T, Klow NE, Sandvik L, Slagsvold CE, Ghanima W, Hafsaahl G, et al. Catheter-directed thrombolysis vs. anticoagulant therapy alone in deep vein thrombosis: results of an open randomized, controlled trial reporting on short-term patency. *J Thromb Haemost* 2009;7:1268-75.
- 9 Enden T, Garratt AM, Klow NE, Sandset PM. Assessing burden of illness following acute deep vein thrombosis: data quality, reliability and validity of the Norwegian version of VEINES-QOL/Sym, a disease-specific questionnaire. *Scand J Caring Sci* 2009;369-74.
- 10 Lamping DL, Schroter S, Kurz X, Kahn SR, Abenhaim L. Evaluation of outcomes in chronic venous disorders of the leg: development of a scientifically rigorous, patient-reported measure of symptoms and quality of life. *J Vasc Surg* 2003;37:410-9.
- 11 Walters SJ, Brazier JE. Comparison of the minimally important difference for two health state utility measures: EQ-5D and SF-6D. *Qual Life Res* 2005;14:1523-32.
- 12 Pickard AS, Neary MP, Cella D. Estimation of minimally important differences in EQ-5D utility and VAS scores in cancer. *Health Qual Life Outcomes* 2007;5:70.

- 13 Kahn SR, Partsch H, Vedantham S, Prandoni P, Kearon C. Definition of post-thrombotic syndrome of the leg for use in clinical investigations: a recommendation for standardization. *J Thromb Haemost* 2009;7:879-83.
- 14 Wittrup-Jensen KU, Lauridsen J, Gudex C, Pedersen KM. Generation of a Danish TTO value set for EQ-5D health states. *Scand J Public Health* 2009;37:459-66.
- 15 Kahn SR, Ducruet T, Lamping DL, Arsenault L, Miron MJ, Roussin A, et al. Prospective evaluation of health-related quality of life in patients with deep venous thrombosis. *Arch Intern Med* 2005;165:1173-8.
- 16 Broholm R, Sillesen H, Damsgaard MT, Jorgensen M, Just S, Jensen LP, et al. Postthrombotic syndrome and quality of life in patients with iliofemoral venous thrombosis treated with catheter-directed thrombolysis. *J Vasc Surg* 2011.
- 17 Ghanima W, Kleven IW, Enden T, Rosales A, Wik HS, Pederstad L, et al. Recurrent venous thrombosis, post-thrombotic syndrome and quality of life after catheter-directed thrombolysis in severe proximal deep vein thrombosis. *J Thromb Haemost* 2011;9:1261-3.
- 18 Comerota AJ. Quality-of-life improvement using thrombolytic therapy for iliofemoral deep venous thrombosis. *Rev Cardiovasc Med* 2002;3 Suppl 2:S61-S67.
- 19 Kahn SR. Measurement properties of the Villalta scale to define and classify the severity of the post-thrombotic syndrome. *J Thromb Haemost* 2009;7:884-8.
- 20 Hofmann LV, Kuo WT. Catheter-directed thrombolysis for acute DVT. *Lancet* 2012;379:3-4.
- 21 Soosainathan A, Moore HM, Gohel MS, Davies AH. Scoring systems for the post-thrombotic syndrome. *J Vasc Surg* 2012.
- 22 Drummond MF, Sculpher M, et al. *Methods for the Economic Evaluation of Health Care Programmes*. 3rd ed. 2006.

CONSORT Statement 2001 - Checklist   
 Items to include when reporting a randomized trial

| <i>PAPER SECTION<br/>And topic</i>         | Item | Descriptor                                                                                                                                                                                                                                                                                                                                                  | Reported on<br>Page #      |
|--------------------------------------------|------|-------------------------------------------------------------------------------------------------------------------------------------------------------------------------------------------------------------------------------------------------------------------------------------------------------------------------------------------------------------|----------------------------|
| <i>TITLE &amp; ABSTRACT</i>                | 1    | <u>How participants were allocated to interventions</u> (e.g., "random allocation", "randomized", or "randomly assigned").                                                                                                                                                                                                                                  | 2                          |
| <i>INTRODUCTION<br/>Background</i>         | 2    | <u>Scientific background and explanation of rationale.</u>                                                                                                                                                                                                                                                                                                  | 3                          |
| <i>METHODS<br/>Participants</i>            | 3    | <u>Eligibility criteria for participants</u> and the <u>settings and locations where the data were collected.</u>                                                                                                                                                                                                                                           | 3                          |
| Interventions                              | 4    | <u>Precise details of the interventions intended for each group and how and when they were actually administered.</u>                                                                                                                                                                                                                                       | 4                          |
| Objectives                                 | 5    | <u>Specific objectives and hypotheses.</u>                                                                                                                                                                                                                                                                                                                  | 3                          |
| Outcomes                                   | 6    | <u>Clearly defined primary and secondary outcome measures</u> and, when applicable, any <u>methods used to enhance the quality of measurements</u> (e.g., multiple observations, training of assessors).                                                                                                                                                    | 5                          |
| Sample size                                | 7    | <u>How sample size was determined</u> and, when applicable, <u>explanation of any interim analyses and stopping rules.</u>                                                                                                                                                                                                                                  | 5                          |
| Randomization --<br>Sequence generation    | 8    | <u>Method used to generate the random allocation sequence, including details of any restrictions</u> (e.g., blocking, stratification)                                                                                                                                                                                                                       | 3,4                        |
| Randomization --<br>Allocation concealment | 9    | <u>Method used to implement the random allocation sequence</u> (e.g., numbered containers or central telephone), clarifying whether the sequence was concealed until interventions were assigned.                                                                                                                                                           | 3                          |
| Randomization --<br>Implementation         | 10   | <u>Who generated the allocation sequence, who enrolled participants, and who assigned participants to their groups.</u>                                                                                                                                                                                                                                     | 4                          |
| Blinding (masking)                         | 11   | <u>Whether or not participants, those administering the interventions, and those assessing the outcomes were blinded to group assignment.</u> If done, <u>how the success of blinding was evaluated.</u>                                                                                                                                                    | 3                          |
| Statistical methods                        | 12   | <u>Statistical methods used to compare groups for primary outcome(s); Methods for additional analyses</u> , such as subgroup analyses and adjusted analyses.                                                                                                                                                                                                | 5                          |
| <i>RESULTS<br/>Participant flow</i>        | 13   | <u>Flow of participants through each stage</u> (a diagram is strongly recommended). Specifically, for each group report the numbers of participants randomly assigned, receiving intended treatment, completing the study protocol, and analyzed for the primary outcome. <u>Describe protocol deviations from study as planned, together with reasons.</u> | 6                          |
| Recruitment                                | 14   | <u>Dates defining the periods of recruitment and follow-up.</u>                                                                                                                                                                                                                                                                                             | 5                          |
| Baseline data                              | 15   | <u>Baseline demographic and clinical characteristics of each group.</u>                                                                                                                                                                                                                                                                                     | 6 + table 1                |
| Numbers analyzed                           | 16   | <u>Number of participants (denominator) in each group included in each analysis and whether the analysis was by "intention-to-treat".</u> State the results in absolute numbers when feasible (e.g., 10/20, not 50%).                                                                                                                                       | 5 + table 2                |
| Outcomes and estimation                    | 17   | <u>For each primary and secondary outcome, a summary of results for each group, and the estimated effect size and its precision</u> (e.g., 95% confidence interval).                                                                                                                                                                                        | 8 + tables<br>2,3,4        |
| Ancillary analyses                         | 18   | <u>Address multiplicity by reporting any other analyses performed</u> , including subgroup analyses and adjusted analyses, indicating those pre-specified and those exploratory.                                                                                                                                                                            | 3                          |
| Adverse events                             | 19   | <u>All important adverse events or side effects in each intervention group.</u>                                                                                                                                                                                                                                                                             | Previous<br>publication(s) |
| <i>DISCUSSION<br/>Interpretation</i>       | 20   | <u>Interpretation of the results</u> , taking into account study hypotheses, sources of potential bias or imprecision and the dangers associated with multiplicity of analyses and outcomes.                                                                                                                                                                | 11-13                      |
| Generalizability                           | 21   | <u>Generalizability (external validity) of the trial findings.</u>                                                                                                                                                                                                                                                                                          | 12                         |
| Overall evidence                           | 22   | <u>General interpretation of the results in the context of current evidence.</u>                                                                                                                                                                                                                                                                            | 11-13                      |

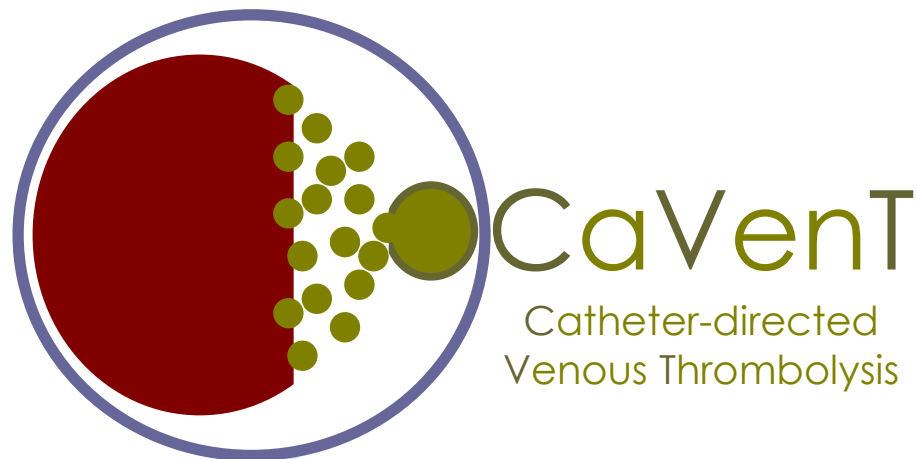

Protocol

Catheter-directed Venous Thrombolysis in Acute Iliofemoral  
Vein Thrombosis - an open Randomized, Controlled, Clinical  
Trial

The CaVenT Study Group

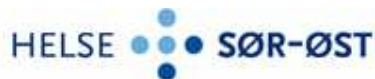

Working Protocol - Amendment 04 – August 2007

1  
2  
3  
4  
5  
6  
7  
8  
9  
10  
11  
12  
13  
14  
15  
16  
17  
18  
19  
20  
21  
22  
23  
24  
25  
26  
27  
28  
29  
30  
31  
32  
33  
34  
35  
36  
37  
38  
39  
40  
41  
42  
43  
44  
45  
46  
47  
48  
49  
50  
51  
52  
53  
54  
55  
56  
57  
58  
59  
60

For peer review only

**CONTENTS**

|    |                                                    |    |
|----|----------------------------------------------------|----|
|    | Investigators                                      | 5  |
|    | CaVenT study group                                 | 7  |
| 1  | Synopsis                                           | 9  |
| 2  | Background                                         | 11 |
| 3  | Objectives                                         | 17 |
| 4  | Hypothesis                                         | 17 |
| 5  | Patient population                                 | 18 |
| 6  | Methods                                            | 19 |
| 7  | Definitions                                        | 24 |
| 8  | Statistics                                         | 27 |
| 9  | Ethical considerations                             | 28 |
| 10 | Milestones                                         | 28 |
| 11 | Trial organization                                 | 29 |
| 12 | Publication                                        | 30 |
|    | References                                         | 31 |
|    | Appendix 1 (Patient Information/Approval formular) | 35 |
|    | Appendix 2 (VEINES-QoL and EQ-D5 formulars)        | 39 |

1  
2  
3  
4  
5  
6  
7  
8  
9  
10  
11  
12  
13  
14  
15  
16  
17  
18  
19  
20  
21  
22  
23  
24  
25  
26  
27  
28  
29  
30  
31  
32  
33  
34  
35  
36  
37  
38  
39  
40  
41  
42  
43  
44  
45  
46  
47  
48  
49  
50  
51  
52  
53  
54  
55  
56  
57  
58  
59  
60

For peer review only

**Investigators:****Principal Investigator:**

Professor Per Morten Sandset, MD, PhD  
Department of Hematology, Ullevål University Hospital (UUS)  
NO-0407 Oslo, Norway  
Tel.: +47 22119247 Fax.: +47 22119040  
E-mail: [p.m.sandset@medisin.uio.no](mailto:p.m.sandset@medisin.uio.no)

**Co-investigator:**

Professor Nils-Einar Kløw, MD, PhD,  
Department of Cardiovascular Radiology, UUS  
Tel.: +47 22119415 Fax.: +47 22119415  
E-mail: [n.e.klow@medisin.uio.no](mailto:n.e.klow@medisin.uio.no)

**Research Fellow:**

Tone Enden, MD  
Departments of Hematology and Radiology, UUS  
Tel.: +47 23016097 Mobile: 91716584 Fax.: +47 22119040  
E-mail: [tone.enden@medisin.uio.no](mailto:tone.enden@medisin.uio.no)

**Statistician:**

Professor Leiv Sandvik, PhD, Statistician  
Research Forum, UUS  
Tel.: +47 23015057 Fax.: +47 22118479  
E-mail: [leiv.sandvik@uus.no](mailto:leiv.sandvik@uus.no)

**Angiologist:**

Consultant Carl-Erik Slagsvold, MD, PhD,  
Department of Vascular Diagnosis and Research, Oslo Vascular Center  
Aker University Hospital (AUS)  
Tel.: +47 22894000  
E-mail: [carlerikslagsvold@yahoo.no](mailto:carlerikslagsvold@yahoo.no)

**Hematologists:**

Consultant Pål Andre Holme, MD, PhD  
Department of Hematology, Rikshospitalet-Radiumhospitalet (RR) HF  
Tel.: +47 23070000  
E-mail: [Holme@rikshospitalet.no](mailto:Holme@rikshospitalet.no)

Consultant Waleed Ghanima, MD  
Department of Internal Medicine, Central Hospital in Østfold  
Tel.: +47 69860000  
E-mail: [Waleed.Ghanima@so-hf.no](mailto:Waleed.Ghanima@so-hf.no)

Consultant Anne Mette Njaastad, MD  
Department of Hematology, AUS  
Tel.: +47 22894865  
E-mail: [AnneMette.Njaastad@akersykehus.no](mailto:AnneMette.Njaastad@akersykehus.no)

**Radiologists:**

Consultant Geir Hafsahl, MD  
The Interventional Centre, RR  
Tel.: +47 23070000  
E-mail: [geir.hafsahl@rikshospitalet.no](mailto:geir.hafsahl@rikshospitalet.no)

Consultant Lars Olaf Holmen, MD  
Department of Radiology, Østfold Hospital Trust Fredrikstad  
Tel.: +47 69860000  
E-mail: [Lars.Olaf.Holmen@so-hf.no](mailto:Lars.Olaf.Holmen@so-hf.no)



1  
2  
3 Consultant Gunnar Sandbæk, MD, PhD  
4 Department of Radiology, Aker University Hospital  
5 Tel.: +47 22 89 40 00  
6 E-mail: [gunnar.sandbaek@medisin.uio.no](mailto:gunnar.sandbaek@medisin.uio.no)  
7

**Research Nurse:**

8 Torill Moan  
9 Department of Hematology, UUS  
10 Tel.: +47 22119242  
11 E-mail: [torillnyborg.moan@uus.no](mailto:torillnyborg.moan@uus.no)  
12

**Technician:**

13 Marie-Christine Mowinckel  
14 Department of Hematology/ Hematological Res Lab, UUS  
15 Tel.: +47 23015783  
16 E-mail: [Marie-Christine.Mowinckel@uus.no](mailto:Marie-Christine.Mowinckel@uus.no)  
17  
18  
19  
20  
21  
22  
23  
24  
25  
26  
27  
28  
29  
30  
31  
32  
33  
34  
35  
36  
37  
38  
39  
40  
41  
42  
43  
44  
45  
46  
47  
48  
49  
50  
51  
52  
53  
54  
55  
56  
57  
58  
59  
60

## The Cavent Study Group

### Interventional Centres

| Participating Centre                        | Collaborator                | E-mail                                                                                   |
|---------------------------------------------|-----------------------------|------------------------------------------------------------------------------------------|
| <b>Aker University Hospital (AUS)</b>       |                             |                                                                                          |
| ▪ Hematologist                              | Anne Mette Njåstad, MD      | <a href="mailto:AnneMette.Njaastad@akersykehus.no">AnneMette.Njaastad@akersykehus.no</a> |
| ▪ Radiologist                               | Gunnar Sandbæk, MD, PhD     | <a href="mailto:gunnar.sandbaek@medisin.uio.no">gunnar.sandbaek@medisin.uio.no</a>       |
| <b>Østold Hospital Trust Fredrikstad</b>    |                             |                                                                                          |
| ▪ Hematologist                              | Waleed Ghanima, MD          | <a href="mailto:Waleed.Ghanima@so-hf.no">Waleed.Ghanima@so-hf.no</a>                     |
| ▪ Radiologist                               | Lars Olav Holmen, MD        | <a href="mailto:Lars.Olaf.Holmen@so-hf.no">Lars.Olaf.Holmen@so-hf.no</a>                 |
| <b>Rikshospitalet-Radiumhospitalet (RR)</b> |                             |                                                                                          |
| ▪ Hematologist                              | Pål Andre Holmen, MD, PhD   | <a href="mailto:Holme@rikshospitalet.no">Holme@rikshospitalet.no</a>                     |
| ▪ Radiologist                               | Geir Hafsaahl, MD           | <a href="mailto:geir.hafsahl@rikshospitalet.no">geir.hafsahl@rikshospitalet.no</a>       |
| <b>Ullevaal University Hospital (UUS)</b>   |                             |                                                                                          |
| ▪ Hematologist                              | Per Morten Sandset, MD, PhD | <a href="mailto:p.m.sandset@medisin.uio.no">p.m.sandset@medisin.uio.no</a>               |
| ▪ Radiologist                               | Nils-Einar Kløw, MD, PhD    | <a href="mailto:n.e.klow@medisin.uio.no">n.e.klow@medisin.uio.no</a>                     |

# The Cavent Study Group

## Participating Centres

### Helse Sør RHF:

| Participating Centre           | Collaborator            | E-mail                                                                                         |
|--------------------------------|-------------------------|------------------------------------------------------------------------------------------------|
| <b>Blefjell sykehus HF</b>     |                         |                                                                                                |
| ▪ Rjukan                       | Oddvar Øygarden, MD     | <a href="mailto:Oddvar.Oygarden@blefjellsykehus.no">Oddvar.Oygarden@blefjellsykehus.no</a>     |
| ▪ Notodden                     | Thomas Baisa, MD        | <a href="mailto:tbaisa@online.no">tbaisa@online.no</a>                                         |
| ▪ Kongsberg                    | Lydia Klevstul, MD      | <a href="mailto:lidia.klevstul@blefjellsykehus.no">lidia.klevstul@blefjellsykehus.no</a>       |
| <b>Ringerike sykehus HF</b>    | Vigdis Stenberg, MD     | <a href="mailto:vigdis.stenberg@Ringerike-sykehus.no">vigdis.stenberg@Ringerike-sykehus.no</a> |
| <b>Sykehuset Buskerud HF</b>   | Jacob Dalgaard, MD, PhD | <a href="mailto:jakob.dalgaard@sb-hf.no">jakob.dalgaard@sb-hf.no</a>                           |
| <b>Sykehuset i Vestfold HF</b> |                         |                                                                                                |
| ▪ Tønsberg                     | Per Arne Standal, MD    | <a href="mailto:per.standal@siv.no">per.standal@siv.no</a>                                     |
| ▪ Larvik                       | Sverre Nyhus, MD        | <a href="mailto:sverre.nyhus@siv.no">sverre.nyhus@siv.no</a>                                   |
| <b>Sykehuset Telemark HF</b>   | Erwin Müller, MD        | <a href="mailto:erwin.muller@sthf.no">erwin.muller@sthf.no</a>                                 |
| <b>Sørlandet sykehus HF</b>    |                         |                                                                                                |
| ▪ Kristiansand                 | Jürgen Rolke, MD        | <a href="mailto:jurgen.rolke@sshf.no">jurgen.rolke@sshf.no</a>                                 |
| ▪ Arendal                      | Yngve Benestad, MD      | <a href="mailto:yngve.benestad@sshf.no">yngve.benestad@sshf.no</a>                             |
| ▪ Flekkefjord                  | Morten Rønningen, MD    | <a href="mailto:mortenro@gmail.com">mortenro@gmail.com</a>                                     |

### Helse Øst RHF:

| Participating Centre                   | Collaborator           | E-mail                                                                                                   |
|----------------------------------------|------------------------|----------------------------------------------------------------------------------------------------------|
| <b>Sykehuset Asker og Bærum HF</b>     | Arnljot Tveit, MD      | <a href="mailto:arnljot.tveit@broadpark.no">arnljot.tveit@broadpark.no</a>                               |
| <b>Akershus Universitetssykehus HF</b> | Willy Aasebø, MD       | <a href="mailto:willy.aasebo@ahus.no">willy.aasebo@ahus.no</a>                                           |
| <b>Lovisenberg Diakonale sykehus</b>   | Hege Pihlstrøm, MD     | <a href="mailto:hege.pihlstrom@lds.no">hege.pihlstrom@lds.no</a>                                         |
| <b>Diakonhjemmets sykehus</b>          | Torbjørn Holm, MD, PhD | <a href="mailto:torbjorn.holm@diakonsyk.no">torbjorn.holm@diakonsyk.no</a>                               |
| <b>Sykehuset Innlandet HF</b>          |                        |                                                                                                          |
| ▪ Gjøvik                               | Per Vandvik, MD, PhD   | <a href="mailto:per.vandvik@start.no">per.vandvik@start.no</a>                                           |
| ▪ Lillehammer                          | Eystein Brandt, MD     | <a href="mailto:eystein.brandt@sykehuset-innlandet.no">eystein.brandt@sykehuset-innlandet.no</a>         |
| ▪ Hamar                                | Øvind Bukten, MD       | <a href="mailto:buktenoyvin@hotmail.no">buktenoyvin@hotmail.no</a>                                       |
| ▪ Elverum                              | Marianne Kalbakken, MD | <a href="mailto:marianne.kalbakken@sykehuset-innlandet.no">marianne.kalbakken@sykehuset-innlandet.no</a> |

# 1 SYNOPSIS

Deep vein thrombosis (DVT) is a severe disease which may cause severe disability and which is sometimes fatal. Conventional treatment with low molecular weight heparin (LMWH) and oral antiocoagulants is associated with some degree of long-term sequelae, i.e., post-thrombotic syndrome (PTS), in more than 60-80% of the patients. Systemic thrombolytic therapy reduces the risk of PTS, but is associated with an unacceptably high risk of bleeding complications, many being disabling or fatal. Catheter-directed thrombolytic (CDT) therapy is a novel treatment modality which has been introduced in many hospitals worldwide. Low dose fibrinolytic agents are delivered continuously and directly into the thrombus through a catheter until thrombus has dissolved. Although many, mostly small series, have suggested a beneficial effect of this costly treatment in terms of increased patency of the veins and improved short term functional outcome, there are no randomized clinical trials documenting its short and long-term efficacy and safety.

The present study is a randomized, open-label, multi-center clinical trial among hospitals in the Eastern and Southern Norway Health Authorities (Helse Øst and Sør). Patients with acute iliofemoral vein thrombosis will be randomized to either conventional treatment or CDT in addition to conventional treatment. Main outcome parameters are patency rates at 6 months and prevalence of PTS at 24 months. A number of secondary outcomes include bleeding complications, recurrent thrombosis, quality of life (QoL), markers of importance for successful lysis and recurrent thrombosis, and whether PTS is related to patency at the end of treatment.

Our main short-term hypothesis is that CDT of first-time acute DVT will increase patency of the affected iliofemoral vein segments after 6 months from <50% on conventional therapy to >80% after CDT. Our main long-term hypothesis is that CDT will improve long-term functional outcome, i.e., risk of PTS, assessed after 2 years, from >25% on conventional treatment to <10% after CDT. The estimated sample size is at least 100 evaluable patients in each group using a statistical significance ( $\alpha$ ) = 5% and a statistical power ( $1-\beta$ ) = 80%.

1  
2  
3  
4  
5  
6  
7  
8  
9  
10  
11  
12  
13  
14  
15  
16  
17  
18  
19  
20  
21  
22  
23  
24  
25  
26  
27  
28  
29  
30  
31  
32  
33  
34  
35  
36  
37  
38  
39  
40  
41  
42  
43  
44  
45  
46  
47  
48  
49  
50  
51  
52  
53  
54  
55  
56  
57  
58  
59  
60

For peer review only

## 2 BACKGROUND

Deep vein thrombosis (DVT) of the lower extremities is a common disease, which is associated with significant morbidity. The incidence of DVT is estimated as 1 event per 1,000 per year, which ranks it as one of the more common cardiovascular disorders<sup>1</sup>. Furthermore, DVT is associated with several important short- and long-term outcomes<sup>2</sup>. Short-term there are symptoms of pain and swelling due to inflammation and obstruction. In a small minority of cases, the condition leads to phlegmasia cerulea dolens in which extensive venous obstruction leads to ischemia or infarction of the extremity. Lastly, DVT can also lead to pulmonary embolism (PE), which can be fatal. Long-term sequelae of DVT include recurrent venous thromboembolism (VTE), post-thrombotic syndrome (PTS), and chronic thromboembolic pulmonary hypertension.

Anticoagulation therapy is the basic treatment of DVT<sup>3</sup>, which purpose is to inhibit the thrombotic process and the inflammatory response so that the thrombus can be cleared by endogenous fibrinolysis. Anticoagulation therapy thereby alleviates acute symptoms, prevents PE, and recurrent events. In most cases, anticoagulation is achieved acutely with unfractionated heparin (UFH) or low molecular weight heparin (LMWH) therapy, followed by long term anticoagulation with oral vitamin K antagonists (eg warfarin).

Anticoagulation therapy is highly efficacious for the prevention of recurrent VTE, PE, and death<sup>3,4</sup>, but the ability to prevent PTS as an outcome is less clear<sup>5</sup>. PTS is thought to be a result of residual venous stenosis and damage to the venous valves which together cause venous hypertension. Venous hypertension leads to chronic edema and fibrin deposition in the interstitial tissues, which in turn bring about poor oxygen exchange. Insufficient oxygenation induces skin changes, pain and, in severe cases, chronic ulceration.

Several studies have addressed the epidemiology of PTS<sup>5,6</sup>, i.e., the incidence of PTS over time, its risk factors, the relationship between vein patency and development of PTS, and the usefulness of compression stockings to prevent PTS following a first episode of acute DVT treated with anticoagulation alone<sup>5,7-10</sup>. The incidence of moderate or severe PTS varied across these studies, but in general increased over time. Moderate to severe PTS developed in 2% to 11% of patients with DVT provided that compression stockings were worn at some early point after the acute DVT. Elastic compression stockings may reduce the risk of PTS by approximately 50%<sup>11,12</sup>. Risk factors for severe PTS identified by some, but not all of these studies, were recurrent ipsilateral DVT, extent of initial thrombus, and obesity. Although the role of return of vein patency has not been established, it may still be an appropriate surrogate for long-term outcomes.

Thrombolytic agents, such as streptokinase (SK), urokinase (UK), and recombinant tissue plasminogen activator (rt-PA) are, theoretically, ideal adjuvants to standard anticoagulation therapy because they potentially dissolve thrombi, promote early vein recanalization, and thereby, minimize vein stenosis and valve dysfunction<sup>13;14</sup>. Therefore, treatment strategies incorporating these agents with anticoagulation may be more effective than those using anticoagulation alone for the prevention of PTS. In addition, in the minority of cases with phlegmasia cerulea dolens, thrombolytic therapies may prove limb saving. However, despite the theoretical advantages and a history of more than 30 years of use, thrombolytic therapy has not been widely embraced for DVT treatment due to poor

*Table 1* Summary results for the trials comparing streptokinase (SK) to intravenous unfractionated heparin (UFH); Values in parentheses are percent of cases.

| Study                               | SK            |             | UFH           |             | Odds Ratio (95% CI) |                    |
|-------------------------------------|---------------|-------------|---------------|-------------|---------------------|--------------------|
|                                     | Events/N      | (%)         | Events/N      | (%)         |                     |                    |
| <b>Efficacy = significant lysis</b> |               |             |               |             |                     |                    |
| Robertson 1 <sup>15</sup>           | 5/8           | (63)        | 1/8           | (13)        | 9.4                 | (0.9, 98.1)        |
| Kakkar <sup>16</sup>                | 7/10          | (70)        | 2/20          | (20)        | 8.2                 | (1.1, 58.7)        |
| Robertson 2 <sup>17</sup>           | 5/9           | (56)        | 1/7           | (14)        | 6.2                 | (0.6, 62.1)        |
| Tsapogas <sup>18</sup>              | 10/19         | (53)        | 1/15          | (7)         | 12.6                | (1.7, 96.5)        |
| Porter <sup>19</sup>                | 13/24         | (54)        | 8/26          | (31)        | 2.6                 | (0.8, 8.2)         |
| Elliot <sup>20</sup>                | 17/26         | (65)        | 0/25          | (0)         | 188.4               | (3.4, 10494)       |
| Arnesen <sup>21</sup>               | 15/21         | (71)        | 5/21          | (24)        | 7.6                 | (1.9, 29.3)        |
| <b>Total</b>                        | <b>72/117</b> | <b>(62)</b> | <b>18/112</b> | <b>(16)</b> | <b>8.5</b>          | <b>(4.4, 16.3)</b> |
| <b>Major Hemorrhage</b>             |               |             |               |             |                     |                    |
| Robertson                           | 2/8           | (25)        | 0/8           | (0)         | 11.9                | (0.2, 843)         |
| Kakkar                              | 3/30          | (39)        | 2/10          | (20)        | 1.6                 | (0.2, 11.8)        |
| Tsapogas                            | 4/19          | (21)        | 0/15          | (0)         | 17.0                | (0.3, 1022)        |
| Porter                              | 4/24          | (17)        | 1/26          | (4)         | 4.2                 | (0.5, 34)          |
| Elliot                              | 2/26          | (8)         | 0/25          | (0)         | 9.4                 | (0.1, 607)         |
| Schulman <sup>22</sup>              | 3/17          | (18)        | 1/19          | (5)         | 3.3                 | (0.4, 29.4)        |
| Arnesen                             | 2/21          | (10)        | 2/21          | (10)        | 1.0                 | (0.1, 7.1)         |
| <b>Total</b>                        | <b>20/115</b> | <b>(16)</b> | <b>6/124</b>  | <b>(5)</b>  | <b>3.9</b>          | <b>(1.5, 10.3)</b> |

*Table 2* Summary results for the trials comparing urokinase (UK) to intravenous unfractionated heparin (UFH); Values in parentheses are percent of cases.

| Study                               | UK<br>Events/N (%) | UFH<br>Events/N (%) | Odds Ratio (95% CI)   |
|-------------------------------------|--------------------|---------------------|-----------------------|
| <b>Efficacy = significant lysis</b> |                    |                     |                       |
| Goldhaber <sup>23</sup>             | 1/8 (13)           | 1/9 (11)            | 1.1 (0.1, 2.9)        |
| Kiil <sup>24</sup>                  | 1/11 (9)           | 1/9 (11)            | 0.8 (0, 14.9)         |
| <b>Total</b>                        | <b>2/19 (11)</b>   | <b>2/18 (11)</b>    | <b>1.0 (0.1, 7.2)</b> |
| <b>Major Hemorrhage</b>             |                    |                     |                       |
| Goldhaber                           | 0/8 (0)            | 1/9 (11)            | 0.2 (0, 16.3)         |
| Kiil                                | 0/11 (0)           | 3/9 (33)            | 0.8 (0, 2.8)          |
| <b>Total</b>                        | <b>0/19 (0)</b>    | <b>4/18 (22)</b>    |                       |

*Table 3* Summary results for the trials comparing recombinant tissue plasminogen activator (rt-PA) to intravenous unfractionated heparin (UFH); Values in parentheses are percent of cases.

| Study                               | rt-PA<br>Events/N (%) | UFH<br>Events/N (%) | Odds Ratio (95% CI)   |
|-------------------------------------|-----------------------|---------------------|-----------------------|
| <b>Efficacy = significant lysis</b> |                       |                     |                       |
| Goldhaber <sup>23</sup>             | 15/53 (28)            | 0/12 (0)            | 10.1 (0.8, 999)       |
| Turpie 2 <sup>25</sup>              | 6/29 (21)             | 2/30 (7)            | 3.7 (0.6, 29)         |
| Turpie 1 <sup>25</sup>              | 7/12 (58)             | 0/12 (0)            | 34.1 (2.0, 999)       |
| <b>Total</b>                        | <b>28/94 (30)</b>     | <b>2/54 (4)</b>     | <b>11.7 (2.6, 53)</b> |
| <b>Major Hemorrhage</b>             |                       |                     |                       |
| Goldhaber                           | 1/53 (2)              | 0/12 (0)            | 0.7 (0.01, 999)       |
| Turpie 2                            | 0/29 (0)              | 0/30 (0)            | 0.3 (0, 22000)        |
| Turpie 1                            | 1/12 (0)              | 0/12 (0)            | 1.0 (0.02, 43)        |
| Verhaeghe <sup>26</sup>             | 0/11 (0)              | 3/9 (33)            | 7.3 (0, 2.8)          |
| <b>Total</b>                        | <b>0/105 (2)</b>      | <b>3/63 (48)</b>    | <b>0.4</b>            |

documentation of its efficacy and high short-term risk of bleeding<sup>27</sup>. Overall only a few hundred patients have been evaluated in randomized clinical trials. The effects of SK treatment versus heparin are summarized in Table I, the effects of urokinase versus heparin in Table II, and that of rt-PA versus heparin in Table III. The overall clinical effects are shown in Table IV.



Table 4 Summary results of all trials of thrombolytic therapy for acute DVT (after<sup>13</sup>).

| Treatment                                                           | Success rate<br>(% with significant lysis) | Major hemorrhage<br>(%) |
|---------------------------------------------------------------------|--------------------------------------------|-------------------------|
| Unfractionated heparin                                              | 12                                         | 6                       |
| SK                                                                  | 62                                         | 16                      |
| SK high dose                                                        | Uninterpretable                            | Uninterpretable         |
| SK low dose                                                         | 27                                         | 15                      |
| UK                                                                  | 11                                         | 0                       |
| rt-PA                                                               | 30                                         | 8                       |
| rt-PA high dose                                                     | 6                                          | 29                      |
| rt-PA local administration                                          | 27                                         | 10                      |
| Catheter directed (UK and rt-PA)<br>(no randomized clinical trials) | 83                                         | 11                      |

Several published studies using ultrasound imaging have demonstrated considerable endogenous ability to lyse thrombi after conventional anticoagulation therapy<sup>2</sup>. One year after acute DVT, somewhere between 30% and 73% of patients will normalize their ultrasound findings. Earlier in the disease course, patency rates are lower, demonstrating that over time there is continued recanalization of the vein. The studies do not describe PTS incidence and whether or not development of the condition correlates with recanalization status. Without this information, it is difficult to answer the important question of whether or not early recanalization protects against development of PTS.

*Catheter-directed thrombolytic therapy (CDT)* is a relatively new technique for treatment of DVT<sup>13;28</sup> and its efficacy has recently been reviewed<sup>29</sup>. It involves application of the thrombolytic agent directly into the thrombus using a catheter with multiple side holes. The catheter is passed into the clot under radiographic guidance. The venous puncture may be central or peripheral to the thrombosed vein. For thrombolysis of the pelvic and the femoral veins, the access was in the early studies of the internal jugular, or the contralateral or ipsilateral femoral veins. Subsequent investigators have used the ipsilateral popliteal vein with success and this appears to be the site of choice. The thrombolytic agent is administered over 1-4 days until dissolution of the clot is apparent. Both UK, alteplase (Actilyse®), reteplase (Rapilysin®) and tenecteplase (Metalyse®) has been used, but UK is no longer available in the market, and only alteplase may be given as a continuous iv infusion, preferably at 0.001-0.02 mg/kg/hour<sup>30;31</sup>. Heparin therapy should be given concomitantly intravenously probably at subtherapeutic doses<sup>29;30;32;33</sup>, corresponding to a 1.2-1.7 times prolongation of aPTT.

1  
2  
3 The decision to discontinue the drug is based on daily venographic examinations through the  
4 indwelling catheter. Depending on the findings the catheter may be pulled out, the infusion continued, or  
5 the catheter repositioned. To obtain flow in the veins balloon inflation may be performed at the follow-  
6 up. Thrombolytic agents are given until there is no more evidence of thrombosis or until there is little  
7 improvement in venographic appearance. After 72-96 hours thrombolysis is discontinued. Adjuvant  
8 therapies include angioplasty, angioplasty with stents, thrombectomy, and surgically created arterio-  
9 venous fistulas.  
10

11  
12 So far, there are no randomized clinical trials with long-term follow-up on the efficacy of CDT  
13 therapy, but at least 15 case series have been reported<sup>29,34-37</sup>. Combining the studies, 263 patients  
14 received this type of therapy for thrombosis of the iliofemoral veins or inferior vena cava. 221 (84%)  
15 patients were considered to have successful short-term outcomes based on venographic appearance and  
16 13 (4.9%) patients had bleeding severe enough to warrant transfusion. Long term outcomes were not  
17 reported, and the authors did not describe the proportion of patients requiring adjuvant therapy.  
18

19  
20 A National DVT Registry was established in North-America to analyze results in a large number  
21 of patients treated with CDT<sup>38</sup>. This registry included 473 patients with documented lower extremity  
22 DVT treated with CDT, but follow-up data included only 287 patients who received 312 treatments.  
23 Thrombi subjected to lysis included either ilio-femoral vein thrombosis in 71% of cases and femoro-  
24 popliteal vein thrombosis in 25% of cases. The mean age of patients was 47.5 years and the mean  
25 duration of infusion was 53 h. All patients had six months of therapy with oral anticoagulants following  
26 CDT and many had heparin as well. Complete lysis was obtained in 31% of patients, 50-99% lysis in  
27 52% and <50% lysis in 17%. Successful lysis was not related to location of the thrombus. The overall  
28 primary patency rate was 80% at 12 months, with better patency for ilio-femoral segments than the  
29 femoro-popliteal segments. Major bleeding complications occurred in 11% of patients; 39% of these at  
30 the venous insertion site, 13% were retroperitoneal hematoma. Minor bleeding events occurred in 16%  
31 of patients, again most often at the venous entry site. There was one fatal intracranial hemorrhage, one  
32 subdural hematoma, and 6 pulmonary emboli of which one was fatal. Thus, the overall mortality rate  
33 from lysis was 0.4%. There was no data on PTS.  
34

35  
36 If the PTS differs between standard therapy and thrombolytic therapy then the quality of life may  
37 differ between patients also. Comerota assessed health-related quality of life in patients after CDT  
38 therapy compared to a group of patients treated with standard anticoagulation therapy<sup>39</sup>. The delayed  
39 functional outcome and wellbeing scores were significantly better in the thrombolytic therapy group.  
40 Although this study had some methodological shortcomings<sup>13</sup>, the findings are still suggestive that  
41 thrombolytic therapy may offer improved quality of life in patients who achieve successful  
42 thrombolysis.  
43  
44  
45  
46  
47  
48  
49  
50  
51  
52  
53  
54  
55  
56  
57  
58  
59  
60

1  
2  
3 Compared to historical data of anticoagulation and intravenous thrombolysis, CDT probably has  
4 higher recanalization rates. The studies so far, including one RCT with 6 months follow-up and 35  
5 patients<sup>40</sup>, have been promising, but unfortunately no high-quality randomized studies with long-term  
6 follow-up have been performed. Experimental data indicate that valves of the femoral veins may be  
7 preserved<sup>41;42</sup>. It is therefore possible that PTS may be reduced. However, long term studies have not  
8 been performed. In the absence of well-designed randomized clinical studies both for early findings, the  
9 implications of early patency for long-term clinical results, the complications, and the costs related to  
10 treatment, CDT therapy for DVT should at present be considered experimental treatment. Still, some  
11 Norwegian hospitals including Aker and Ullevål University Hospitals, Rikshospitalet, and the Østfold  
12 Hospital Trust Fredrikstad, do provide this high-intensive treatment to selected patients. A case-series  
13 with careful follow-up at Aker University Hospital has recently been published<sup>31</sup>.

14  
15  
16 In the present study, we aim to investigate the role of CDT therapy for treatment of acute DVT  
17 as compared with established treatment with low molecular weight heparin. The study will be an open-  
18 label, randomized study of patients with first-time acute DVT of the affected limb, and our major  
19 outcome parameter will be the frequency of PTS as related to early venographic patency. The results of  
20 this study have the potential to properly define the role of this costly treatment in the future.  
21  
22  
23  
24  
25  
26  
27  
28  
29  
30  
31  
32  
33  
34  
35  
36  
37  
38  
39  
40  
41  
42  
43  
44  
45  
46  
47  
48  
49  
50  
51  
52  
53  
54  
55  
56  
57  
58  
59  
60

### 3 OBJECTIVES

#### 3.1 PRIMARY OBJECTIVES

To investigate whether catheter-directed thrombolytic therapy for first-time acute DVT of the iliofemoral veins may:

- 3.1.1 increase patency rate at 6 months.
- 3.1.2 reduce the risk of PTS at 2 years.

#### 3.2 SECONDARY OBJECTIVES

- 3.2.1 To investigate frequency of clinically relevant bleeding related to the procedure.
- 3.2.2 To investigate effects on quality of life (QoL).
- 3.2.3 To investigate cost-effectiveness of treatment.
- 3.2.4 To investigate the procedural success of CDT.
- 3.2.5 To identify markers of importance for successful thrombolysis.
- 3.2.6 To investigate patency at 2 years.
- 3.2.7 To investigate PTS at 6 and 60 months.
- 3.2.8 To investigate whether presence or absence of PTS at any time point is related to patency at end of treatment.
- 3.2.9 To investigate prevalence of vein anomalies (and need for angioplasty or stents).
- 3.2.10 To investigate prevalence of underlying thrombophilia.
- 3.2.11 To investigate frequency of recurrent VTE during follow-up.
- 3.2.12 To identify markers of importance for recurrent thrombosis.

### 4 HYPOTHESES

Our main short-term hypothesis is that CDT of first-time acute DVT will increase patency of the affected iliofemoral vein segments after 6 months from <50% on conventional therapy to >80% after CDT. Our main long-term hypothesis is that CDT will improve long-term functional outcome, i.e., risk of PTS, assessed after 2 years, from >25% on conventional treatment to <10% after CDT.

## 5 PATIENT POPULATION

### 5.1 INCLUSION CRITERIA

- 5.1.1 Age 18-75 years.
- 5.1.2 Onset of symptoms <21 days.
- 5.1.3 Objectively verified DVT (ultrasonography, venography, computed tomography, or magnetic resonance imaging) localized in the upper half of the thigh, the common iliac vein or the combined iliofemoral segment.
- 5.1.4 Informed consent (Appendix 1).

### 5.2 EXCLUSION CRITERIA

- 5.2.1 Anticoagulant therapy prior to trial entry for >7 days.
- 5.2.2 Contraindications to thrombolytic therapy, including bleeding diathesis.
- 5.2.3 Indications for thrombolytic therapy, e.g., phlegmacia coerulea dolens or isolated vena cava thrombosis.
- 5.2.4 Severe anemia (hemoglobin <8 g/dL).
- 5.2.5 Thrombocytopenia (platelets <80·10<sup>9</sup>/L).
- 5.2.6 Severe renal failure – creatinine clearance <30 ml/min. Creatinine clearance will be calculated according to the following formula:

$$\text{Creatinine clearance (ml/min)} = \frac{b \times (140 - \text{age (yrs)}) \times \text{body weight (kg)}}{\text{serum creatinine } (\mu\text{mol/L)}}$$

$$b=1.23 \text{ (females); } 1.04 \text{ (males)}$$

- 5.2.7 Severe hypertension, i.e. persistent systolic blood pressure >160 mm Hg or diastolic blood pressure >100 mm Hg.
- 5.2.8 Pregnancy and thrombosis ≤7 days post-partum (may be included after 7 days post-partum).
- 5.2.9 Less than 14 days post-surgery or post-trauma (may be included after 14 days).
- 5.2.10 History of subarachnoidal or intracerebral bleeding.
- 5.2.11 Disease with life expectancy <24 months.
- 5.2.12 Drug abuse or mental disease that may interfere with treatment and follow-up.
- 5.2.13 Former ipsilateral proximal DVT.
- 5.2.14 Malignant disease requiring chemotherapy.
- 5.2.15 Any thrombolytic therapy within 7 days prior to trial inclusion.

## 6 METHODS

### 6.1 DESIGN

Multi-center, open-label, randomized clinical study on the effect and safety of CDT therapy as compared with conventional therapy for the treatment of acute, first-time ilio-femoral DVT. The study will be a collaborative study of hospitals belonging to the Eastern and Southern Norway Health Authorities (Helse Øst and Sør).

### 6.2 PATIENT RECRUITMENT

Eligible patients (section 5) will be invited to participate in the study. Informed consent (Appendix 1) in accordance with the revised Helsinki Declaration must be obtained from the patient before randomization.

### 6.3 RANDOMIZATION

Patients will be randomized by sealed numbered envelopes using block randomization. Each envelope will contain information on treatment allocation. A new patient will be allocated the lowest numbered envelope. Treatment will be open-label, but stratified for extension of DVT, i.e., only femoral or iliofemoral DVT.

### 6.4 TREATMENT

#### 6.4.1 Acute treatment

Patients will be randomized to one of the following treatment groups:

|          |                                                                                                                                                     |
|----------|-----------------------------------------------------------------------------------------------------------------------------------------------------|
| Group I  | Catheter-directed thrombolytic therapy with rt-PA in addition to conventional treatment with low molecular weight heparin (for details – see 6.4.2) |
| Group II | Conventional treatment with low molecular weight heparin (see 6.4.3)                                                                                |

Drugs will be ordered from the hospital's pharmacy according to local routines.

- Group I will be given rt-PA (Actilyse®) combined with unfractionated heparin and followed by low molecular weight heparin (LMWH) and warfarin.
- Group II, the conventional treatment arm, will be given LMWH, either sc dalteparin (Fragmin®), 200 IU/kg od, or enoxaparin (Klexane®), 1.5 mg/kg od, according to local routines, and warfarin.

## 6.4.2 Group I - Catheter-Directed Thrombolytic (CDT) therapy – procedures

- **Anticoagulant and fibrinolytic therapy**

- Discontinue oral anticoagulants - INR should be <1.5 before the procedure.
- In case of prior sc LMWH therapy treatment should be discontinued at least 8 h before the procedure, and in case of prior UFH treatment APTT (Cephotest®) should be adjusted to 40-60 sec during the procedure (see below).
- An iv bolus dose of UFH, 5000 U, should be given followed by continuous iv UFH<sup>1</sup> infusion at 15 U/kg/h. Adjust dose to keep APTT (Cephotest®) at 40-60 sec, first adjustment 6-12 h after start of treatment.
- During the thrombolytic treatment keep APTT (Cephotest®) at 40-60 sec.
- At the completion of thrombolytic treatment:
  - ✓ discontinue UFH
  - ✓ give sc LMWH after 1 h, (either dalteparin, Fragmin®, 200 U/kg bid, or enoxaparin, Klexane®, 1,5 mg/kg bid).
  - ✓ Oral warfarin (Marevan®) will be initiated according to local routines.
  - ✓ LMWH will be discontinued when INR has been in therapeutic range (2.0-3.0) for at least 24 hours, but should not be given for less than total 4-5 days.

- **Interventional procedures.** In an interventional radiology unit, an introducer will be inserted into an appropriate vein, preferentially the popliteal vein, guided by ultrasound to prevent puncture of the artery or laceration of the vein wall and to secure only a single puncture. If possible, the wire and catheter should be introduced above the proximal part of the thrombus (use fitting-sized perfusion catheters, e.g., 10, 20, 30, or 50 cm). A venography should then be performed to disclose the topography of the thrombus. CDT may be discontinued if introduction of the catheter through the occluded segment is not successful. Catheters should be properly fixed to the skin.

The perfusion catheter (and the perfusion wire) should cover the central to peripheral part of the thrombus. Rt-PA (Actilyse®), 20 mg diluted in 500 ml 0.9% NaCl, will be infused at 0.01 mg/kg/h. Maximal dose infused will be 20 mg/24 h. The rt-PA dosage may be split into two catheters using lower concentration, keeping flow the same.

---

<sup>1</sup> A suitable working solution should be made to contain UFH 40 U/ml in 0.9% NaCl, e.g., mix 20000 U of UFH in 500 ml 0.9% NaCl or 40000 U in 1000 ml 0.9% NaCl. The infusion rate (ml/h) then reflects total units of UFH per 24 hrs in thousands, e.g., 25 ml/h corresponds to 25000 U/24 h, 30 ml/h 30000 U/24 h, and so on.

1  
2  
3 After insertion of catheter, venography, and start of iv UFH and iv rt-PA infusion, treatment will  
4 continue in medical wards. Blood pressure and pulse and the puncture site are assessed 4 times a  
5 day. Hemostasis is also monitored by daily analysis of hemoglobin, fibrinogen, D-dimer, INR, and  
6 platelet counts. APTT is monitored twice daily for adjustment of heparin dose. The patient will be  
7 encouraged to use the muscle pump of the leg while in bed. No food and drink restrictions.  
8  
9

10  
11 Effect of treatment will be assessed by venography at least every 24 hrs, and catheters  
12 repositioned accordingly. Treatment should normally not continue for >96 h. At the end of  
13 treatment, the catheters will be removed immediately and hemostasis obtained by manual  
14 compression of the puncture site. Pressure will be continued for 2 hrs with a roll while the patient is  
15 immobilized.  
16  
17  
18  
19

- 20  
21 • **Stents.** Balloon dilatation and placement of venous stents will be performed at the discretion of the  
22 operator to establish flow and to obtain <50% residual stenosis.  
23  
24
- 25 • **Concomitant medication during procedure.** During the interventional procedure concomitant use  
26 of other antithrombotic agents should be avoided because of increased risk of bleeding. This  
27 includes antiplatelet agents (e.g., acetylsalicylic acid, thienopyridines, GPIIb/IIIa inhibitors, non  
28 steroidal anti-inflammatory agents, or other) or anticoagulants (e.g., low molecular weight heparin,  
29 pentasaccharide, warfarin, or other). Concomitant use of ACE-inhibitors appears to increase the risk  
30 of anafylactoid reactions.  
31  
32  
33  
34  
35  
36  
37

#### 38 **6.4.3 Group II – conventional treatment with LMWH**

39 Patients allocated the conventional treatment arm will be given sc LMWH, either dalteparin  
40 (Fragmin®), 200 U/kg od, or enoxaparin (Klexane®), 1.5 mg/kg od, according to local hospital  
41 routines, and simultaneous warfarin (Marevan®) according to local routines. LMWH will be  
42 discontinued when INR has been in therapeutic range (2.0-3.0) for at least 24 hours, but should not be  
43 given for less than total 4-5 days.  
44  
45  
46  
47  
48

#### 49 **6.4.4 Subacute and chronic phase after DVT**

50 Patients will be treated with warfarin for at least 6 months with target INR 2.0-3.0. All patients will be  
51 advised to use knee-high compression stockings, grade II, for 6 months.  
52  
53  
54  
55  
56  
57  
58  
59  
60



## 6.5 VISITS AND PROCEDURES DURING FOLLOW-UP

End-point assessment will be performed by a vascular surgeon with no previous contact or knowledge of patients' medical history or treatment allocation. At each visit the patients will explicitly be told not to reveal treatment allocation.

### 6.5.1 Visit 1 (trial entry – at hospital admission/)

6.5.1.1 Case history and general clinical examination.

6.5.1.2 Compression ultrasonography or venography, alternatively CT or MRI angiography diagnosing acute iliofemoral DVT.

6.5.1.3 Laboratory screening (hemoglobin, platelets, leukocytes, creatinine, ASAT, ALAT, GT, bilirubin, INR, APTT, D-Dimer, cholesterol, and CRP).

6.5.1.4 Thrombophilia screening (collection of blood samples).

6.5.1.5 Assessment of baseline QoL before treatment using VEINES-QoL and EQ-D5 (Appendix 2).

6.5.1.6 Assessment of baseline clinical score using Villalta<sup>5,43</sup> score and the C classification of CEAP, see Definitions.

### 6.5.2 Visit 2 (hospital stay)

6.5.2.1 Daily assessment of hemoglobin, platelets, fibrinogen, APTT, INR, and D-Dimer, and bilateral leg circumference.

6.5.2.2 Daily venography will be performed in patients allocated CDT.

6.5.2.4 Bleeding complications.

### 6.5.3 Visit 3 – 6 m ± 2 weeks

6.5.3.1 Clinical history – recurrent thrombosis – malignancy.

6.5.3.2 Clinical PTS scores according to Villalta and CEAP. Bilateral leg circumference.

6.5.3.3 Assessment of functional venous obstruction by air-plethysmography.

6.5.3.4 Ultrasonographic assessment of postthrombotic changes, patency, and reflux<sup>44-47</sup>.

6.5.3.5 Quality of Life (QoL) assessment (Appendix 2).

6.5.3.6 D-dimer testing, INR, thrombophilia screening (if previously inconclusive).

### 6.5.4 VISIT 4 – 12 m ± 4 weeks

Telephone interview – recurrent thrombosis – malignancy.

**6.5.5 VISIT 5 – 24 m ± 4 weeks**

6.5.5.1 Clinical history – recurrent thrombosis – malignancy.

6.5.5.2 Clinical PTS scores according to Villalta and CEAP. Bilateral leg circumference..

6.5.5.3 Assessment of functional venous obstruction by air-plethysmography.

6.5.5.4 Ultrasonographic assessment of postthrombotic changes, patency, and reflux

6.5.5.5 Quality of Life (QoL) assessment (Appendix 2).

6.5.5.6 D-dimer, INR, thrombophilia screening (if previously inconclusive).

**6.5.6 VISIT 6 – 36 m ± 4 weeks**

Telephone interview – recurrent thrombosis – malignancy.

**6.5.7 VISIT 7 – 48 m ± 4 weeks**

Telephone interview – PTS screening – recurrent thrombosis – malignancy.

**6.5.8 VISIT 8 – 60 m ± 8 weeks**

6.5.8.1 Clinical history – recurrent thrombosis – malignancy.

6.5.8.2 Clinical PTS scores according to Villalta and CEAP. Bilateral leg circumference.

6.5.8.3 Ultrasonographic assessment of postthrombotic changes, patency, and reflux.

6.5.8.4 Assessment of functional venous obstruction by air-plethysmography.

6.5.8.5 Quality of Life (QoL) assessment (Appendix 2).

## 7 DEFINITIONS

### 7.1 Post-Thrombotic Syndrome (PTS)

#### 7.1.1 The Villalta Score<sup>5;43</sup>

PTS will be evaluated using the Villalta score, which scores PTS based on five symptoms and six objective signs (each item graded from 0 to 3):

Five symptoms: heaviness, pain (spontaneous or during deambulation), cramps, pruritus, and paresthesia.

Six signs: pretibial edema, induration of the skin, hyperpigmentation, new venous ectasia, redness, pain during calf compression

A total score of 5-14 indicates mild to moderate PTS, whereas a score of 15 or more indicates severe PTS. A lower limb venous ulcer indicates severe PTS regardless of the sum of the remaining signs and symptoms. The Villalta Score is quantitative and useful for longitudinal assessment of PTS.

#### 7.1.2 The Clinical-Etiology-Anatomic-Pathophysiologic (CEAP) classification<sup>48;49</sup>

This is a classification of Clinical (dermatological) signs, Etiology, Anatomic distribution and Pathophysiologic dysfunction:

|                                       |                                                                  |                                                                              |
|---------------------------------------|------------------------------------------------------------------|------------------------------------------------------------------------------|
| <b>Clinical signs</b>                 | <b>Class 0</b>                                                   | <b>No visible or palpable signs of venous disease</b>                        |
|                                       | <b>Class 1</b>                                                   | <b>Teleangiectases or reticular veins</b>                                    |
|                                       | <b>Class 2</b>                                                   | <b>Varicose veins</b>                                                        |
|                                       | <b>Class 3</b>                                                   | <b>Edema</b>                                                                 |
|                                       | <b>Class 4</b>                                                   | <b>a. pigmentation, eczema<br/>b. lipodermatosclerosis, atrophie blanche</b> |
|                                       | <b>Class 5</b>                                                   | <b>Healed ulceration (and skin changes as defined above)</b>                 |
|                                       | <b>Class 6</b>                                                   | <b>Active ulceration (and skin changes as defined above)</b>                 |
| <b>Etiological classification</b>     | <b>Congenital, primary, secondary</b>                            |                                                                              |
| <b>Anatomic distribution</b>          | <b>Superficial, deep, or perforator, alone or in combination</b> |                                                                              |
| <b>Pathophysiological dysfunction</b> | <b>Reflux or obstruction, alone or in combination</b>            |                                                                              |

## 7.2 Non-invasive assessment of veins

### 7.2.1 Deep vein thrombosis<sup>50</sup>

#### 7.2.1.1 Acute deep vein thrombosis

The principal criterion is inability to completely compress the vein lumen when examining the vein in the transverse plane. Other possible findings are distention of the vein, absence of flow, loss of phasic flow, and visualization of clot.

#### 7.2.1.2 Chronic thrombosis and postthrombotic changes

Absence of complete incompressibility indicates residual thrombosis. Other postthrombotic features are wall-thickening and intraluminal hyperechoic structure.

### 7.2.2 Flow

Using Doppler-ultrasound, flow will be graded as spontaneous flow, forced flow (on peripheral compression), and no flow (obstruction)<sup>38</sup>. Flow will also be examined in supine position.

### 7.2.3 Reflux

Using Doppler-ultrasound and a distal inflation cuff with the patient in standing position, reflux is defined as reversal of the velocity curve after distal pneumatic decompression lasting longer than 0.5 second<sup>51-53</sup>.

### 7.2.4 Assessment of functional venous obstruction

Venous obstruction will be assessed by using air plethysmography<sup>54;55</sup>. The patients will lie supine with the calf elevated (by a cushion) to the level of the heart. An occlusion cuff will be placed proximally on the thigh, and a recording cuff with a pressure of 6 mmHg will be placed on the calf. The proximal cuff will be inflated to 50 mmHg for 1 min. A venous outflow curve will be recorded when this cuff is deflated, and maximum outflow can then be calculated (delta mm/sec). Low outflow rates indicate presence of functional venous obstruction. The procedure will be performed on both legs.

### 7.2.5 Assessment of venous patency

Assessment of venous patency will include compressibility, flow and functional venous obstruction.

### 7.3 Evaluation of thrombolysis

Based on venography before and after CDT, thrombolysis will be graded by a scoring system<sup>38</sup>. Score=0 indicates an open vein, score=1 a partly occluded vein, and score=2 a completely occluded vein.

Each of the following 7 venous segments will be given a grade (0-2): IVC, the common iliac vein, the external iliac vein, the common femoral vein, the proximal and distal superficial femoral veins, and the popliteal vein. A total thrombus score before and after lysis will be calculated by adding the 7 scores. The difference between the pre- and postlysis thrombus scores divided by the prelysis score gives the grade of thrombolysis. Grade I=<50%; grade II=50-90%, and grade III=complete thrombolysis

### 7.4 Bleeding Complications

7.4.1 **Major bleeding** – any bleeding associated with a reduction in hemoglobin by  $\geq 2$  g/100 mL or bleeding requiring transfusion of  $\geq 2$  U pack red blood cells or whole blood or bleeding in a critical organ, intracranial, retroperitoneal or pericardial or bleeding contributing to death.

7.4.2 **Clinically relevant non-major bleeding** – overt bleeding not meeting criteria for major bleeding but satisfying a priori criteria defined by the safety monitoring committee including for example skin hematomas  $>100$  cm<sup>2</sup>, epistaxis lasting  $>5$  min, being repetitive ( $\geq 2/24$  h) or requiring intervention (packing, electrocoagulation), macroscopic hematuria – either spontaneous or lasting  $>24$  h after instrumentation (catheter or surgery) of the urogenital tract, or any other bleeding type that is considered to have clinical consequences for the patient.

7.4.3 **Trivial bleeding** - all other overt bleeding episodes not meeting the criteria for clinically relevant bleeding.

### 7.5 Thrombophilia screening

Includes screening for antithrombin, protein C- and protein S deficiencies, factor V Leiden mutation, the prothrombin gene 20210GA allele variation and the methylene tetrahydrofolate reductase (MTHFR) mutation, homocystein, lupus anticoagulants and anticardiolipin antibodies.

## 8 STATISTICS

### 8.1 Sample size

Numerous studies indicate that conventional treatment, i.e., UFH or LMWH followed by oral anticoagulants is associated with PTS in more than 60-80% of the cases, whereas systemic thrombolytic therapy is associated with PTS in approximately 30% of the patients<sup>5;21;56</sup>. More recent studies employing systematic use of elastic compression stockings suggest PTS in approximately 25% of the patients.<sup>11</sup> In the present study, we will assume that the rate of PTS after 2 years will be at least 25% in those allocated conventional therapy as compared with less than 10% in those given CDT. For patency after 6 m we assume that the rate is less than 50% in those allocated conventional treatment as compared with at least 80% in those given CDT. With a significance level of  $\alpha \leq 5\%$  and a statistical power  $(1-\beta)$  of  $\geq 80\%$ , we will need to randomize approximately 100 patients in each group.

Also as presented in our hypotheses, we assume that venous patency after 6 months occurs in less than 50% in those allocated conventional treatment as compared to at least 80% in those given adjunctive CDT. It may then be shown that with a significance level of 5% and a statistical power  $\geq 80\%$ , 76 patients must be included to test this short-term hypothesis. We plan to analyse patency rates after 6 months based on the first 100 patients with 6 months patency data. This analysis will be repeated when 200 patients have 6 months patency data.

### 8.2 Statistical methods

All statistical analysis will be performed according to the intention-to-treat principle. If ineligible patients are mistakenly included, they may be excluded (ref Ferguson et al BMJ 2002), apart from this, no other post-randomization exclusions will be made. The effect of treatment will be determined using 2x2 tables with assessment of the difference between patent vessels and prevalence of PTS, relative risks, and odds ratios with 95% confidence limits. The prevalence of clinically relevant bleeding, PTS, vein anomalies, thrombophilia, recurrent DVT will be determined using point estimates with 95% confidence intervals. A stratification analysis will be carried out using the Mantel-Haenzel method. Differences in baseline characteristics may be adjusted for using a multivariate logistic model. This may be done if there are substantial differences between the two groups, and if the variable(s) is probably or certainly associated with the outcome measure, e.g., age and previous VTE. Missing data on end-point variables will be scored as previous score or last/worst score carried forward.

## 9 ETHICAL CONSIDERATIONS

This study will recruit patients with proximal DVT. Even though the efficacy and safety of CDT for the treatment of acute proximal DVT remains to be established, some hospitals in many countries now offer CDT to selected patients with severe DVT, especially when the DVT extends into the caval vein. In the present study, non-trial CDT to selected patients with severe DVT will be left to the discretion of the responsible physician.

The study will be performed in accordance with the revised Helsinki Declaration and Good Clinical Practice (GCP). The study will only start after approval with the Regional Ethical Committee and the Norwegian Medical Agency. All patients will be given study specific identification codes and all data will be stored in a secured database on a secured server for research at the Ullevål University Hospital. This server as well as data management will be controlled by the Patient Protection Ombud at the Ullevål University Hospital. A non-linked database will provide information on the patients' contact information to allow follow-up. A biobank will be established at Ullevål University Hospital after approval.

## 10 MILESTONES

|             |                                                                             |
|-------------|-----------------------------------------------------------------------------|
| Q1-2006     | First patient randomized                                                    |
| Q4-2007     | Last patient randomized                                                     |
| Q2-2008     | Six months follow-up of all patients for primary efficacy parameter patency |
| Q2-3-2008   | Reporting of study design and primary efficacy parameter patency            |
| Q4-2009     | Two-years follow-up of all patients for primary efficacy parameter PTS      |
| Q4-Q1-09-10 | Reporting of primary efficacy parameter PTS                                 |
| Q4-2012     | Five years follow-up of last patient for patency and PTS.                   |

# 11 TRIAL ORGANIZATION

## 11.1 GENERAL ORGANIZATION

The study is an investigator initiated study which will be run independently of the pharmaceutical industry. The study is financially supported by a grant from Eastern Norway Health Authority (doctoral fellow; Helse Øst grant no 2005-090).

The study will be a major collaborative effort among hospitals of the Eastern and Southern Norway Health Authorities (Helse Øst and Sør). All hospitals will be invited to participate in the study. Patients allocated to conventional treatment will be treated at the local hospital, whereas patients allocated CDT will be treated at Ullevål and Aker University Hospitals, the National Hospital and the Central Hospital in Østfold.

## 11.2 COMMITTEES

### 11.2.1 Executive committee

- Per Morten Sandset (chair) – UUS – Hematologist
- Nils-Einar Kløw – UUS – Radiologist
- Leiv Sandvik – UUS – Statistician
- Tone Enden – UUS – Research fellow – Resident in Radiology
- Carl-Erik Slagsvold – AUS – Angiologist
- Anne Mette Njåstad – AUS – Hematologist
- Gunnar Sandbaek – AUS – Radiologist
- Pål Andre Holme – RR – Hematologist
- Geir Hafsaahl – RR – Radiologist
- Waleed Ghanima – Østfold Hospital Trust Fredrikstad – Hematologist
- Lars Olav Holmen – Østfold Hospital Trust Fredrikstad – Radiologist

### 11.2.2 Steering committee

- Executive committee (chair Per Morten Sandset)
- One member from each collaborating hospital

### 11.2.3 Safety and monitoring committee

- Professor emeritus Ulrich Abildgaard
- Professor Frank Brosstad, Rikshospitalet-Radiumhospitalet, Oslo



## 12 PUBLICATION

Results of this study will be published in international medical journals, but will also be communicated to the general population whenever appropriate. The results may potentially have great interest for the scientific community, for health-providers in decision making, and for the general population. Publication will follow the Vancouver convention. Tone Enden will be the first author of these publications.

For peer review only

## REFERENCES

1. White RH. The epidemiology of venous thromboembolism. *Circulation* 2003;107:14-18.
2. Kearon C. Natural history of venous thromboembolism. *Circulation* 2003;107:122-130.
3. Kearon C. Initial treatment of venous thromboembolism. *Thromb.Haemost.* 1999;82:887-891.
4. Kearon C. Duration of anticoagulation for venous thromboembolism. *J.Thromb.Thrombolysis.* 2001;12:59-65.
5. Kahn SR, Ginsberg JS. Relationship between deep venous thrombosis and the postthrombotic syndrome. *Arch.Intern.Med.* 2004;164:17-26.
6. Prandoni P, Lensing AW, Cogo A et al. The long-term clinical course of acute deep venous thrombosis. *Ann.Intern.Med.* 1996;125:1-7.
7. Lindner DJ, Edwards JM, Phinney ES, Taylor LM, Jr., Porter JM. Long-term hemodynamic and clinical sequelae of lower extremity deep vein thrombosis. *J.Vasc.Surg.* 1986;4:436-442.
8. Brandjes DP, Buller HR, Heijboer H et al. Randomised trial of effect of compression stockings in patients with symptomatic proximal-vein thrombosis. *Lancet* 1997;349:759-762.
9. Franzeck UK, Schalch I, Bollinger A. On the relationship between changes in the deep veins evaluated by duplex sonography and the postthrombotic syndrome 12 years after deep vein thrombosis. *Thromb.Haemost.* 1997;77:1109-1112.
10. Biguzzi E, Mozzi E, Alatri A et al. The post-thrombotic syndrome in young women: retrospective evaluation of prognostic factors. *Thromb.Haemost.* 1998;80:575-577.
11. Prandoni P, Lensing AWA, Prins MH et al. Below-Knee Elastic Compression Stockings To Prevent the Post-Thrombotic Syndrome: A Randomized, Controlled Trial. *Ann Intern Med* 2004;141:249-256.
12. Ginsberg JS. Routine Stocking Therapy after Deep Venous Thrombosis: A Clinical Dilemma. *Ann Intern Med* 2004;141:314-315.
13. Wells PS, Forster AJ. Thrombolysis in deep vein thrombosis: is there still an indication? *Thromb.Haemost.* 2001;86:499-508.
14. Marder VJ, Stewart D. Towards safer thrombolytic therapy. *Semin.Hematol.* 2002;39:206-216.
15. Robertson BR, Nilsson IM, Nylander G. Value of streptokinase and heparin in treatment of acute deep venous thrombosis. A coded investigation. *Acta Chir Scand.* 1968;134:203-208.
16. Kakkar VV, Flanc C, Howe CT, O'Shea M, Flute PT. Treatment of deep vein thrombosis. A trial of heparin, streptokinase, and arvin. *Br.Med.J.* 1969;1:806-810.
17. Robertson BR, Nilsson IM, Nylander G. Thrombolytic effect of streptokinase as evaluated by phlebography of deep venous thrombi of the leg. *Acta Chir Scand.* 1970;136:173-180.
18. Tsapogas MJ, Peabody RA, Wu KT et al. Controlled study of thrombolytic therapy in deep vein thrombosis. *Surgery* 1973;74:973-984.
19. Porter JM, Seaman AJ, Common HH et al. Comparison of heparin and streptokinase in the treatment of venous thrombosis. *Am.Surg.* 1975;41:511-519.
20. Elliot MS, Immelman EJ, Jeffery P et al. A comparative randomized trial of heparin versus streptokinase in the treatment of acute proximal venous thrombosis: an interim report of a prospective trial. *Br.J.Surg.* 1979;66:838-843.

- 1
  - 2
  - 3
  - 4
  - 5
  - 6
  - 7
  - 8
  - 9
  - 10
  - 11
  - 12
  - 13
  - 14
  - 15
  - 16
  - 17
  - 18
  - 19
  - 20
  - 21
  - 22
  - 23
  - 24
  - 25
  - 26
  - 27
  - 28
  - 29
  - 30
  - 31
  - 32
  - 33
  - 34
  - 35
  - 36
  - 37
  - 38
  - 39
  - 40
  - 41
  - 42
  - 43
  - 44
  - 45
  - 46
  - 47
  - 48
  - 49
  - 50
  - 51
  - 52
  - 53
  - 54
  - 55
  - 56
  - 57
  - 58
  - 59
  - 60
21. Arnesen H, Hoiseth A, Ly B. Streptokinase of heparin in the treatment of deep vein thrombosis. Follow-up results of a prospective study. *Acta Med.Scand.* 1982;211:65-68.
22. Schulman S, Granqvist S, Juhlin-Dannfelt A, Lockner D. Long-term sequelae of calf vein thrombosis treated with heparin or low-dose streptokinase. *Acta Med.Scand.* 1986;219:349-357.
23. Goldhaber SZ, Hirsch DR, MacDougall RC, Polak JF, Creager MA. Bolus recombinant urokinase versus heparin in deep venous thrombosis: a randomized controlled trial. *Am.Heart J.* 1996;132:314-318.
24. Kiil J, Carvalho A, Sakso P, Nielsen HO. Urokinase or heparin in the management of patients with deep vein thrombosis? *Acta Chir Scand.* 1981;147:529-532.
25. Turpie AG, Levine MN, Hirsh J et al. Tissue plasminogen activator (rt-PA) vs heparin in deep vein thrombosis. Results of a randomized trial. *Chest* 1990;97:172S-175S.
26. Verhaeghe R, Besse P, Bounameaux H, Marbet GA. Multicenter pilot study of the efficacy and safety of systemic rt-PA administration in the treatment of deep vein thrombosis of the lower extremities and/or pelvis. *Thromb.Res.* 1989;55:5-11.
27. O'Meara JJ, III, McNutt RA, Evans AT, Moore SW, Downs SM. A decision analysis of streptokinase plus heparin as compared with heparin alone for deep-vein thrombosis. *N.Engl.J.Med.* 1994;330:1864-1869.
28. Semba CP, Dake MD. Iliofemoral deep venous thrombosis: aggressive therapy with catheter-directed thrombolysis. *Radiology* 1994;191:487-494.
29. Sharafuddin MJ, Sun S, Hoballah JJ et al. Endovascular management of venous thrombotic and occlusive diseases of the lower extremities. *J.Vasc.Interv.Radiol.* 2003;14:405-423.
30. Semba CP, Bakal CW, Calis KA et al. Alteplase as an Alternative to Urokinase. *J Vasc Interv Radiol* 2000;11:279-287.
31. Ly B, Njaastad AM, Sandbaek G et al. [Catheter-directed thrombolysis of iliofemoral venous thrombosis]. *Tidsskr.Nor Laegeforen.* 2004;124:478-480.
32. Semba CP, Sugimoto K, Razavi MK. Alteplase and tenecteplase: applications in the peripheral circulation. *Tech.Vasc Interv Radiol* 2001;4:99-106.
33. Benenati J, Shlansky-Goldberg R, Meglin A, Seidl E. Thrombolytic and Antiplatelet Therapy in Peripheral Vascular Disease with Use of Reteplase and/or Abciximab: The SCVIR Consultants' Conference; May 22, 2000; Orlando, FL. *J Vasc Interv Radiol* 2001;12:795-805.
34. Bjarnason H, Kruse JR, Asinger DA et al. Iliofemoral deep venous thrombosis: safety and efficacy outcome during 5 years of catheter-directed thrombolytic therapy. *J Vasc Interv Radiol* 1997;8:405-418.
35. Grossman C, McPherson S. Safety and efficacy of catheter-directed thrombolysis for iliofemoral venous thrombosis. *AJR Am.J.Roentgenol.* 1999;172:667-672.
36. Patel NH, Stookey KR, Ketcham DB, Cragg AH. Endovascular Management of Acute Extensive Iliofemoral Deep Venous Thrombosis Caused by May-Thurner Syndrome. *J Vasc Interv Radiol* 2000;11:1297-1302.
37. Grunwald MR, Hofmann LV. Comparison of Urokinase, Alteplase, and Reteplase for Catheter-directed Thrombolysis of Deep Venous Thrombosis. *J Vasc Interv Radiol* 2004;15:347-352.
38. Mewissen MW, Seabrook GR, Meissner MH et al. Catheter-directed thrombolysis for lower extremity deep venous thrombosis: report of a national multicenter registry. *Radiology* 1999;211:39-49.
39. Comerota AJ, Throm RC, Mathias SD, Haughton S, Mewissen M. Catheter-directed thrombolysis for iliofemoral deep venous thrombosis improves health-related quality of life. *J.Vasc.Surg.* 2000;32:130-137.
40. Elsharawy M, Elzayat E. Early results of thrombolysis vs anticoagulation in iliofemoral venous thrombosis. *A*

- 1  
2  
3 randomised clinical trial. *Eur.J.Vasc.Endovasc.Surg.* 2002;24:209-214.
- 4  
5 41. Cho JS, Martelli E, Mozes G, Miller V, Gloviczki P. Effects of thrombolysis and venous thrombectomy on valvular  
6 competence, thrombogenicity, venous wall morphology, and function. *J Vasc Surg* 1998;28:787-799.
- 7  
8 42. Rhodes(a) J, Cho JS, Gloviczki P et al. Thrombolysis for experimental deep venous thrombosis maintains valvular  
9 competence and vasoreactivity. *J Vasc Surg* 2000;31:1193-1205.
- 10  
11 43. Villalta S, Prandoni P, Cogo A et al. The utility of non-invasive tests for detection of previous proximal-vein  
12 thrombosis. *Thromb.Haemost.* 1995;73:592-596.
- 13  
14 44. Baker SR, Burnand KG, Sommerville KM et al. Comparison of venous reflux assessed by duplex scanning and  
15 descending phlebography in chronic venous disease. *The Lancet* 1993;341:400-403.
- 16  
17 45. Gaitini D, Torem S, Pery M, Kaftori JK. Image-directed Doppler ultrasound in the diagnosis of lower-limb venous  
18 insufficiency. *J Clin.Ultrasound* 1994;22:291-297.
- 19  
20 46. Magnusson M, Kalebo P, Lukes P, Sivertsson R, Risberg B. Colour Doppler ultrasound in diagnosing venous  
21 insufficiency. A comparison to descending phlebography. *Eur.J Vasc Endovasc.Surg* 1995;9:437-443.
- 22  
23 47. Mantoni M, Larsen L, Lund JO et al. Evaluation of chronic venous disease in the lower limbs: comparison of five  
24 diagnostic methods. *Br J Radiol* 2002;75:578-583.
- 25  
26 48. Rutherford R, Padberg F, Comerota A et al. Venous severity scoring: An adjunct to venous outcome assessment. *J*  
27 *Vasc Surg* 2000;31:1307-1312.
- 28  
29 49. Eklof B, Rutherford RB, Bergan JJ et al. Revision of the CEAP classification for chronic venous disorders: Consensus  
30 statement. *Journal of Vascular Surgery* 2004;40:1248-1252.
- 31  
32 50. Fraser JD, Anderson DR. Deep Venous Thrombosis: Recent Advances and Optimal Investigation with US. *Radiology*  
33 1999;211:9-24.
- 34  
35 51. Sarin S, Sommerville K, Farrah J, Scurr JH, Coleridge Smith PD. Duplex ultrasonography for assessment of venous  
36 valvular function of the lower limb. *Br J Surg.* 1994;81:1591-1595.
- 37  
38 52. Labropoulos N, Tiongson J, Pryor L et al. Definition of venous reflux in lower-extremity veins. *Journal of Vascular*  
39 *Surgery* 2003;38:793-798.
- 40  
41 53. Coleridge-Smith P, Labropoulos N, Partsch H et al. Duplex Ultrasound Investigation of the Veins in Chronic Venous  
42 Disease of the Lower Limbs--UIP Consensus Document. Part I. Basic Principles. *European Journal of Vascular and*  
43 *Endovascular Surgery*;In Press, Corrected Proof:
- 44  
45 54. Strandén E, Laerum F. [Plethysmographic diagnosis of deep vein thrombosis]. *Tidsskr.Nor Laegeforen.*  
46 1982;102:321-323.
- 47  
48 55. Nicolaides AN. Investigation of Chronic Venous Insufficiency : A Consensus Statement. *Circulation* 2000;102:126e-  
49 163.
- 50  
51 56. Heldal M, Seem E, Sandset PM, Abildgaard U. Deep vein thrombosis: a 7-year follow-up study. *J Intern.Med.*  
52 1993;234:71-75.
- 53  
54  
55  
56  
57  
58  
59  
60

1  
2  
3  
4  
5  
6  
7  
8  
9  
10  
11  
12  
13  
14  
15  
16  
17  
18  
19  
20  
21  
22  
23  
24  
25  
26  
27  
28  
29  
30  
31  
32  
33  
34  
35  
36  
37  
38  
39  
40  
41  
42  
43  
44  
45  
46  
47  
48  
49  
50  
51  
52  
53  
54  
55  
56  
57  
58  
59  
60

For peer review only

## Appendix 1

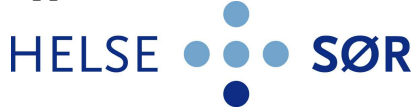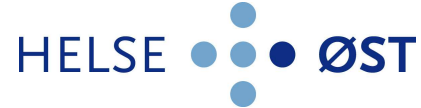

## FORESPØRSEL OM Å DELTA I EN FORSKNINGSSSTUDIE:

*CaVenT-studien – kateterbasert trombolyse ved akutt dyp venetrombose*

Denne forespørselen om å delta i forskningsprosjektet ”CaVenT” går til pasienter som legges inn med akutt blodpropp i lår- og bekkenener ved sykehus i Helseregion Sør og Øst.

**Du bestemmer selv**

Det er frivillig å delta i studien. Dersom du velger å ikke delta, trenger du ikke oppgi noen grunn for dette. Dersom du ikke ønsker å delta i studien, vil behandlingen din være den vanlige behandlingen som pasienter med din sykdom mottar. Du kan når som helst trekke deg underveis uten begrunnelse.

**Bakgrunn**

Undersøkelsene viser at du har fått en blodpropp i en samleblodåre (vene) i låret og/eller i bekkenet. Tilstanden kalles dyp venetrombose. Standardbehandlingen ved akutt dyp venetrombose er blodfortynnende medisin, først sprøyter med lavmolekylært heparin (inneholder legemidlene Fragmin eller Klexane) i 4-8 dager og deretter tabletter (legemidlet Marevan) i minst 3-6 måneder. Målet med behandlingen er å stoppe utviklingen av blodproppen, forhindre at blodproppen løsner og går til lungene og å redusere plagsomme senfølger i form av smerter, hevelse og hudforandringer. Slike senfølger kalles posttrombotisk syndrom. Om lag en fjerdedel av pasientene utvikler posttrombotisk syndrom i løpet av de første 2 årene etter standardbehandling for blodpropp.

De siste årene er det utviklet en ny behandling for å løse opp blodpropp som kalles kateterbasert trombolyse. Behandlingen er beskrevet i detalj under. Foreløpige resultater tyder på at denne behandlingen kan løse opp blodproppen raskere og forebygge senplagene, men så langt har det ikke vært gjennomført studier som kan gi gode svar på dette.

**Prosjektets formål**

Hensikten med dette forskningsprosjektet er å avklare om tilleggsbehandling med kateterbasert trombolyse gir bedre resultat i akutt fase og færre plager på lang sikt uten økt risiko for bivirkninger sammenliknet med standard blodfortynnende medisin alene.

**Om kateterbasert trombolyse/blodproppløsende behandling**

Behandlingen gjennomføres i samarbeid mellom hematologisk/indremedisinsk avdeling og røntgenavdelingen. Selve prosedyren blir utført ved røntgenavdelingen. Du får først lokalbedøvelse. Deretter fører vi inn et 2 mm tykt plastrør i venen (blodåren) i knehasen og inn i selve blodproppen. Så gir vi kontinuerlig en lav dose av et blodproppløsende medikament (legemidlet Actilyse) gjennom plastrøret i inntil 3-4 dager. Samtidig gir vi også en lav dose blodfortynnende medisin (legemidlet heparin) som drypp intravenøst. Blodproppen løser seg langsomt opp, og tidspunktet for å avslutte behandlingen blir bestemt ut fra daglige kontroller med røntgen kontrastundersøkelse. Mens behandlingen pågår må man holde sengen.

Dersom det i forløpet av behandlingen påvises en unormal blodåre (vene), oftest en medfødt innsnevring, som kan forklare hvorfor blodpropp oppsto, vil vi vurdere å gi tilleggsbehandling ved å

1  
2  
3 utvide blodåren ved hjelp av et ballongkateter, eventuelt legge inn en stent (forsterkning). Dette vil sikre  
4 normal blodstrøm etter behandlingen.

5  
6 Behandling med blodpropp-oppløsning utføres ved flere av de store sykehusene i regionen, og dersom  
7 ditt sykehus ikke kan utføre behandlingen, vil du bli overført til et av disse.

8  
9 Etter avsluttet kateterbasert behandling vil du få vanlig behandling med lavmolekylært heparin og  
10 Marevan og bli fulgt opp etter gjeldende retningslinjer ved ditt lokalsykehus.

### 11 12 13 14 **Gjennomføring**

15 For å kunne gjøre en vitenskapelig sammenlikning av resultatene, vil det bli foretatt en trekning slik at  
16 halvparten av pasientene vil få standard behandling, mens den andre halvparten vil få kateterbasert  
17 trombolysse i tillegg. Du gis skriftlig og muntlig informasjon om forskningsprosjektet når du legges inn.

18  
19 Deltagelse i studien medfører i tillegg til vanlig behandling og oppfølging, ekstra samtaler med lege  
20 (noen som telefonkonsultasjon) og enkelte undersøkelser (ultralyd, blodprøver) ved ulike tidspunkt i de  
21 påfølgende 2 år. Uansett behandling vil vi kontakte deg regelmessig, enten per telefon (etter 12, 36 og  
22 48 måneder) eller ved kontrollundersøkelse (etter 6, 24 og 60 måneder). Undersøkelsene omfatter  
23 ultralydundersøkelse og blodprøver.

### 24 25 26 27 **Risiko ved behandlingen**

28 Kateterbasert trombolysse medfører en litt økt risiko for blødning sammenliknet med den vanlige  
29 behandlingen. Det vanligste er mindre blødning ved innstikksstedet der plastrøret er lagt inn. Hos noen  
30 få pasienter har det vært rapportert blødninger andre steder, mest alvorlig er blødninger i tarm og hode.  
31 Dersom slik blødning oppstår, vil vi stoppe den trombolytiske behandlingen og sette i gang tiltak for å  
32 behandle blødningen etter gjeldende rutiner ved sykehusene.

### 33 34 35 **Blodprøver og biobank**

36 Blodprøvene som blir tatt og informasjonen utledet av dette materialet vil bli lagret i en såkalt  
37 "forskningsbiobank" ved Ullevål universitetssykehus HF. Hvis du sier ja til å delta i studien, gir du også  
38 samtykke til at det biologiske materialet og analyseresultater inngår i biobanken. Blodprøvene vil bli  
39 lagret i fryseboks ved hematologisk forskningslaboratorium i tråd med interne retningslinjer.  
40 Viseadministrerende direktør ved sykehuset er ansvarlig for biobanken. Biobanken planlegges å vare til  
41 2027. Etter dette vil materiale og opplysninger bli destruert/slettet etter interne retningslinjer.

### 42 43 44 **Slik ivaretas dine prøver og personopplysninger**

45 Personvernet ivaretas i samsvar med betingelser gitt i konsesjon fra Datatilsynet/melding til sykehusets  
46 personvernombud. Forskningsdata, inklusive opplysninger utledet av det biologiske materialet, lagres på  
47 eget, sikret datasystem ved sykehuset. Alle opplysningene vil bli behandlet konfidensielt. I prosjektet  
48 har du et prosjektnummer som knytter deg som person til prosjektet gjennom en adresseliste. Kun  
49 prosjektansvarlig har adgang til adresselisten.

### Hvem som har vurdert prosjektet

Regional komité for medisinsk forskningsetikk, Øst-Norge, har vurdert prosjektet, og har ingen innvendinger mot at det gjennomføres. Forskningsbiobanken er meldt til Sosial- og helsedirektoratet, som ikke har innsigelser til opprettelse av biobanken.

### Økonomi

Forskningsprosjektet er et samarbeid mellom sykehusavdelinger i Helse Sør og Øst. Prosjektet er delvis finansiert gjennom forskningsmidler fra Helse Øst. Det er ikke aktuelt å samarbeide med industri, og det er heller ikke aktuelt med kommersialisering av produkter. Prosjektansvarlig og andre som arbeider med prosjektet har ingen form for økonomisk vinning knyttet til prosjektet.

### Dine rettigheter

Hvis du sier ja til å delta i studien, har du rett til å få innsyn i hvilke opplysninger som er registrert om deg. Du har videre rett til å få korrigert evt. feil i de opplysningene vi har registrert. Hvis du senere trekker deg fra studien, kan du kreve at materialet destrueres. Du kan også kreve å få slettet opplysninger vi har registrert. Ved henvendelse til prosjektansvarlig kan du få nærmere opplysninger om dette. Du kan ikke få slettet opplysninger eller destruert materiale dersom de er anonymisert, er viderebehandlet og inngår i et annet biologisk produkt eller dersom opplysningene allerede har inngått i et vitenskapelig arbeid. Adgangen til destruksjon gjelder heller ikke dersom det ved lov er fastsatt at materialet eller opplysningene skal oppbevares.

### Prosjektansvarlig – mer informasjon

Dersom du har flere spørsmål om studien eller biobanken kan du kontakte en av de prosjektansvarlige legene (se under) eller legen som er ansvarlig for oppfølging ved ditt sykehus (se under).

-----  
Per Morten Sandset  
Avd. overlege, professor, dr. med  
Prosjektansvarlig  
Hematologisk avdeling, UUS

-----  
Nils Einar Kløw  
Seksjonsoverlege, professor, dr. med  
Hjerte- og karradiologisk avdeling, UUS

-----  
Tone Enden  
Lege, stipendiat  
Prosjektleder, UUS  
Tlf UUS 22 11 80 80, calling nr. 581 78389  
e-mail: [tone.enden@uus.no](mailto:tone.enden@uus.no)

Prosjektansvarlig lege ved ditt sykehus er:

Navn:  
Tittel:  
Adresse:  
Telefon:



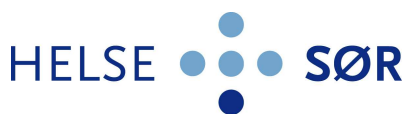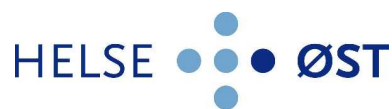

## CaVenT-studien

### Samtykke – prosjektdeltaker

Deltakelse i studien er basert på ditt frivillige, informerte samtykke. Dersom du ønsker informasjon utover det som framkommer i dette informasjonsskrivet og den muntlige informasjonen du har mottatt/vil få, har du full anledning til å be om dette.

Dersom du etter å ha fått den informasjon du synes er nødvendig, sier ja til å delta i studien, må du signere samtykkeerklæringen.

Jeg, \_\_\_\_\_ (navn med blokkbokstaver), bekrefter at jeg har mottatt skriftlig informasjon om studien, har fått anledning til å innhente den informasjon jeg har hatt behov for, og er villig til å delta i prosjektet.

Signatur \_\_\_\_\_ Dato \_\_\_\_\_  
(sign. prosjektdeltaker) (datert av prosjektdeltaker)

Informasjon om studien er gitt av:

Lege, \_\_\_\_\_ (navn med blokkbokstaver)

Signatur \_\_\_\_\_ Dato \_\_\_\_\_  
(sign. lege)

## Appendix 2: VEINES-QoL and EQ-D5

**Spørreskjema om helse**

Opplysningene vil være til hjelp for å holde rede på hvordan du har det, og om hvordan du klarer å utføre dine vanlige aktiviteter.

Vis hvilke utsagn som passer best på **din helsetilstand i dag** ved å sette et kryss i en av rutene utenfor hver av gruppene nedenfor.

**Gange**

Jeg har ingen problemer med å gå omkring.

Jeg har litt problemer med å gå omkring.

Jeg er sengeliggende.

**Personlig stell**

Jeg har ingen problemer med personlig stell.

Jeg har litt problemer med å vaske meg eller kle meg.

Jeg er ute av stand til å vaske meg eller kle meg.

**Vanlige gjøremål** (f.eks. arbeid, studier, husarbeid, familie- eller fritidsaktiviteter).

Jeg har ingen problemer med å utføre mine vanlige gjøremål

Jeg har litt problemer med å utføre mine vanlige gjøremål.

Jeg er ute av stand til å utføre mine vanlige gjøremål.

**Smerte/ubehag**

Jeg har verken smerte eller ubehag.

Jeg har moderat smerte eller ubehag.

Jeg har sterk smerte eller ubehag.

**Angst/depresjon**

Jeg er verken engstelig eller deprimert.

Jeg er noe engstelig eller deprimert.

Jeg er svært engstelig eller deprimert.

Besvar hvert spørsmål nedenfor ved å krysse av svaret som angitt. Hvis du er usikker på hva du skal svare, vennligst svar etter beste evne.

Disse spørsmålene er om din oppfatning av **beina dine**.

1. I løpet av de 4 siste ukene, hvor ofte har du hatt noen av disse plagene i beina?

| (Sett ett kryss på hver linje)   | Daglig                                | Flere ganger i uka                    | Omtrent én gang i uka                 | Sjeldnere enn én gang i uka           | Aldri                                 |
|----------------------------------|---------------------------------------|---------------------------------------|---------------------------------------|---------------------------------------|---------------------------------------|
| 1. Tunge bein                    | <input type="checkbox"/> <sub>1</sub> | <input type="checkbox"/> <sub>2</sub> | <input type="checkbox"/> <sub>3</sub> | <input type="checkbox"/> <sub>4</sub> | <input type="checkbox"/> <sub>5</sub> |
| 2. Vondt i beina                 | <input type="checkbox"/> <sub>1</sub> | <input type="checkbox"/> <sub>2</sub> | <input type="checkbox"/> <sub>3</sub> | <input type="checkbox"/> <sub>4</sub> | <input type="checkbox"/> <sub>5</sub> |
| 3. Hevelse                       | <input type="checkbox"/> <sub>1</sub> | <input type="checkbox"/> <sub>2</sub> | <input type="checkbox"/> <sub>3</sub> | <input type="checkbox"/> <sub>4</sub> | <input type="checkbox"/> <sub>5</sub> |
| 4. Kramper om natta              | <input type="checkbox"/> <sub>1</sub> | <input type="checkbox"/> <sub>2</sub> | <input type="checkbox"/> <sub>3</sub> | <input type="checkbox"/> <sub>4</sub> | <input type="checkbox"/> <sub>5</sub> |
| 5. Varme eller brennende følelse | <input type="checkbox"/> <sub>1</sub> | <input type="checkbox"/> <sub>2</sub> | <input type="checkbox"/> <sub>3</sub> | <input type="checkbox"/> <sub>4</sub> | <input type="checkbox"/> <sub>5</sub> |
| 6. Urolige bein                  | <input type="checkbox"/> <sub>1</sub> | <input type="checkbox"/> <sub>2</sub> | <input type="checkbox"/> <sub>3</sub> | <input type="checkbox"/> <sub>4</sub> | <input type="checkbox"/> <sub>5</sub> |
| 7. Banking                       | <input type="checkbox"/> <sub>1</sub> | <input type="checkbox"/> <sub>2</sub> | <input type="checkbox"/> <sub>3</sub> | <input type="checkbox"/> <sub>4</sub> | <input type="checkbox"/> <sub>5</sub> |
| 8. Kløe                          | <input type="checkbox"/> <sub>1</sub> | <input type="checkbox"/> <sub>2</sub> | <input type="checkbox"/> <sub>3</sub> | <input type="checkbox"/> <sub>4</sub> | <input type="checkbox"/> <sub>5</sub> |
| 9. Prikking                      | <input type="checkbox"/> <sub>1</sub> | <input type="checkbox"/> <sub>2</sub> | <input type="checkbox"/> <sub>3</sub> | <input type="checkbox"/> <sub>4</sub> | <input type="checkbox"/> <sub>5</sub> |

2. Når på dagen er **plagene i beina** mest uttalte? (Sett ett kryss)

- |                                                           |                                                                      |
|-----------------------------------------------------------|----------------------------------------------------------------------|
| <input type="checkbox"/> <sub>1</sub> Når jeg våkner      | <input type="checkbox"/> <sub>4</sub> Om natta                       |
| <input type="checkbox"/> <sub>2</sub> Midt på dagen       | <input type="checkbox"/> <sub>5</sub> Når som helst i løpet av dagen |
| <input type="checkbox"/> <sub>3</sub> På slutten av dagen | <input type="checkbox"/> <sub>6</sub> Aldri                          |

3. Sammenlignet med for ett år siden, hvordan vil du vurdere dine **plager i beina nå**? (Sett ett kryss)

- |                                                                                 |                                                                             |
|---------------------------------------------------------------------------------|-----------------------------------------------------------------------------|
| <input type="checkbox"/> <sub>1</sub> Mye bedre nå enn for ett år siden         | <input type="checkbox"/> <sub>4</sub> Noe verre nå enn for ett år siden     |
| <input type="checkbox"/> <sub>2</sub> Noe bedre nå enn for ett år siden         | <input type="checkbox"/> <sub>5</sub> Mye verre nå enn for ett år siden     |
| <input type="checkbox"/> <sub>3</sub> Omtrent det samme nå som for ett år siden | <input type="checkbox"/> <sub>6</sub> Jeg hadde ingen plager i beina i fjor |

4. Følgende spørsmål gjelder daglige aktiviteter. Setter **plagene i beina** begrensninger for dine daglige aktiviteter? Hvis « ja », i hvilken grad?

| (Sett ett kryss på hver linje)                                                    | Jeg jobber ikke            | JA, begrenser meg mye      | JA, begrenser meg litt     | NEI, begrenser meg ikke    |
|-----------------------------------------------------------------------------------|----------------------------|----------------------------|----------------------------|----------------------------|
| a. Daglige aktiviteter på jobb.                                                   | <input type="checkbox"/> 0 | <input type="checkbox"/> 1 | <input type="checkbox"/> 2 | <input type="checkbox"/> 3 |
| b. Daglige aktiviteter hjemme (husarbeid, småjobber, hagearbeid, o.l.)            |                            | <input type="checkbox"/> 1 | <input type="checkbox"/> 2 | <input type="checkbox"/> 3 |
| c. Fritidsaktiviteter hvor du må <u>stå</u> lenge (selskap, ta buss, handle o.l.) |                            | <input type="checkbox"/> 1 | <input type="checkbox"/> 2 | <input type="checkbox"/> 3 |
| d. Fritidsaktiviteter hvor du må <u>sitte</u> lenge (kino, teater, på reise o.l.) |                            | <input type="checkbox"/> 1 | <input type="checkbox"/> 2 | <input type="checkbox"/> 3 |

5. 3. I løpet av de 4 siste ukene, har du hatt noen av disse problemene i jobb eller i daglige aktiviteter på grunn av **plagene i beina**?

(Sett ett kryss på hver linje)

|                                                                                                           | JA                         | NEI                        |
|-----------------------------------------------------------------------------------------------------------|----------------------------|----------------------------|
| a. Redusert arbeidstid eller tid til andre aktiviteter                                                    | <input type="checkbox"/> 1 | <input type="checkbox"/> 2 |
| b. Gjennomført mindre enn du skulle ønsket                                                                | <input type="checkbox"/> 1 | <input type="checkbox"/> 2 |
| c. Blitt begrenset i type jobb eller aktiviteter                                                          | <input type="checkbox"/> 1 | <input type="checkbox"/> 2 |
| d. Hatt vanskeligheter med å utføre jobben eller andre aktiviteter (f eks det krevde større anstrengelse) | <input type="checkbox"/> 1 | <input type="checkbox"/> 2 |

6. I løpet av de 4 siste ukene, i hvilken grad har plagene i beina kommet i veien for samvær med familie, venner, naboer eller grupper? (Sett ett kryss)

- |                                                 |                                        |
|-------------------------------------------------|----------------------------------------|
| <input type="checkbox"/> 1 Ikke i det hele tatt | <input type="checkbox"/> 4 Ganske stor |
| <input type="checkbox"/> 2 Lett                 | <input type="checkbox"/> 5 Svær        |
| <input type="checkbox"/> 3 Moderat              |                                        |

7. Hvor mye smerter har du hatt i beina i løpet av de 4 siste ukene? (sett ett kryss)

- |                                       |                                      |
|---------------------------------------|--------------------------------------|
| <input type="checkbox"/> 1 Ingen      | <input type="checkbox"/> 4 Moderat   |
| <input type="checkbox"/> 2 Svært lite | <input type="checkbox"/> 5 Mye       |
| <input type="checkbox"/> 3 Lite       | <input type="checkbox"/> 6 Svært mye |

8. Disse spørsmålene er om hvordan du føler deg, og om hvordan du har hatt det de siste 4 ukene som følge av plagene i beina. For hvert spørsmål, kryss av for det svaret som passer best med hvordan du har følt deg. Hvor mye i løpet av de 4 siste ukene-

| (Sett ett kryss på hver linje) | Hele tiden | Det meste av tiden | Ganske ofte | Av og til | Sjelden | Aldri |
|--------------------------------|------------|--------------------|-------------|-----------|---------|-------|
|                                |            |                    |             |           |         |       |

|    |                                                                |                                       |                                       |                                       |                                       |                                       |                                       |
|----|----------------------------------------------------------------|---------------------------------------|---------------------------------------|---------------------------------------|---------------------------------------|---------------------------------------|---------------------------------------|
| a. | har du vært bekymret for hvordan beina dine ser ut?            | <input type="checkbox"/> <sub>1</sub> | <input type="checkbox"/> <sub>2</sub> | <input type="checkbox"/> <sub>3</sub> | <input type="checkbox"/> <sub>4</sub> | <input type="checkbox"/> <sub>5</sub> | <input type="checkbox"/> <sub>6</sub> |
| b. | har du følt deg irritabel                                      | <input type="checkbox"/> <sub>1</sub> | <input type="checkbox"/> <sub>2</sub> | <input type="checkbox"/> <sub>3</sub> | <input type="checkbox"/> <sub>4</sub> | <input type="checkbox"/> <sub>5</sub> | <input type="checkbox"/> <sub>6</sub> |
| c. | har du følt at du har vært til byrde for familie eller venner? | <input type="checkbox"/> <sub>1</sub> | <input type="checkbox"/> <sub>2</sub> | <input type="checkbox"/> <sub>3</sub> | <input type="checkbox"/> <sub>4</sub> | <input type="checkbox"/> <sub>5</sub> | <input type="checkbox"/> <sub>6</sub> |
| d. | har du vært bekymret for å skumpe bort ting?                   | <input type="checkbox"/> <sub>1</sub> | <input type="checkbox"/> <sub>2</sub> | <input type="checkbox"/> <sub>3</sub> | <input type="checkbox"/> <sub>4</sub> | <input type="checkbox"/> <sub>5</sub> | <input type="checkbox"/> <sub>6</sub> |
| e. | har dine beins utseende påvirket ditt klesvalg ?               | <input type="checkbox"/> <sub>1</sub> | <input type="checkbox"/> <sub>2</sub> | <input type="checkbox"/> <sub>3</sub> | <input type="checkbox"/> <sub>4</sub> | <input type="checkbox"/> <sub>5</sub> | <input type="checkbox"/> <sub>6</sub> |

Vennligst oppgi dato for utfyllingen: \_\_\_\_/\_\_\_\_/\_\_\_\_ (dag/måned/år)



**Health-related quality of life after catheter-directed thrombolysis for deep vein thrombosis; from the CaVenT study (an open RCT)**

|                                 |                                                                                                                                                                                                                                                                                                                                                                                                                                                                                                                                                                                                                                                    |
|---------------------------------|----------------------------------------------------------------------------------------------------------------------------------------------------------------------------------------------------------------------------------------------------------------------------------------------------------------------------------------------------------------------------------------------------------------------------------------------------------------------------------------------------------------------------------------------------------------------------------------------------------------------------------------------------|
| Journal:                        | <i>BMJ Open</i>                                                                                                                                                                                                                                                                                                                                                                                                                                                                                                                                                                                                                                    |
| Manuscript ID:                  | bmjopen-2013-002984.R1                                                                                                                                                                                                                                                                                                                                                                                                                                                                                                                                                                                                                             |
| Article Type:                   | Research                                                                                                                                                                                                                                                                                                                                                                                                                                                                                                                                                                                                                                           |
| Date Submitted by the Author:   | 05-Jun-2013                                                                                                                                                                                                                                                                                                                                                                                                                                                                                                                                                                                                                                        |
| Complete List of Authors:       | Enden, Tone; Oslo University Hospital, Radiology<br>Wik, Hilde; Oslo University Hospital Rikshospitalet, Department of Haematology; University of Oslo, Institute of Clinical Medicine<br>Kvam, Ann Kristin; Oslo University Hospital Rikshospitalet, Department of Haematology<br>Haig, Ylva; Oslo University Hospital, Radiology; University of Oslo, Institute of Clinical Medicine<br>Kløw, Nils-Einar; Oslo University Hospital, Radiology; University of Oslo, Institute of Clinical Medicine<br>Sandset, Per Morten; Oslo University Hospital Rikshospitalet, Department of Haematology; University of Oslo, Institute of Clinical Medicine |
| <b>Primary Subject Heading</b>: | Cardiovascular medicine                                                                                                                                                                                                                                                                                                                                                                                                                                                                                                                                                                                                                            |
| Secondary Subject Heading:      | Haematology (incl blood transfusion), Patient-centred medicine                                                                                                                                                                                                                                                                                                                                                                                                                                                                                                                                                                                     |
| Keywords:                       | Bleeding disorders & coagulopathies < HAEMATOLOGY, Vascular medicine < INTERNAL MEDICINE, Interventional radiology < RADIOLOGY & IMAGING                                                                                                                                                                                                                                                                                                                                                                                                                                                                                                           |
|                                 |                                                                                                                                                                                                                                                                                                                                                                                                                                                                                                                                                                                                                                                    |

1  
2  
3  
4  
5 **Health-related quality of life after catheter-directed thrombolysis for**  
6 **deep vein thrombosis: secondary outcomes of the randomised, non-**  
7 **blinded, parallel-group CaVenT study**  
8  
9  
10  
11  
12  
13

14  
15  
16 ~~**Health-related quality of life after catheter-directed thrombolysis for**~~  
17 ~~**deep vein thrombosis; from the CaVenT study (an open RCT)**~~  
18  
19  
20  
21  
22  
23

24 Tone Enden\*†, Hilde Skuterud Wik\*§, Ann Kristin Kvam\*, Ylva Haig†§, Nils Einar Kløw†§, Per Morten  
25 Sandset\*§  
26  
27  
28

29  
30 \*Department of haematology, Oslo University Hospital, Oslo, Norway  
31

32  
33 †Department of radiology, Oslo University Hospital, Oslo, Norway  
34

35  
36 §Institute of Clinical Medicine, University of Oslo, Oslo, Norway  
37  
38  
39

40  
41 Corresponding author: Tone Enden, Department of radiology, Oslo University Hospital, Postboks 4950  
42 Nydalen, 0424 OSLO, Norway, phone +47 915 02770, fax +47 22 11 92 40  
43  
44  
45  
46

47 **Keywords:** health outcomes, post-thrombotic syndrome, quality of life, venous thrombosis, thrombolytic  
48  
49 therapy  
50  
51

52  
53 Word count: 2309 words in main text  
54  
55  
56  
57  
58  
59  
60

## Summary:

Objectives: To investigate whether additional catheter-directed thrombolysis (CDT) improves long-term ~~patient reported~~ quality of life (QOL) compared to standard treatment with anticoagulation and compression stockings alone in patients with proximal deep vein thrombosis (DVT).

Design: Open-label randomised controlled trial.

Setting: 19 hospitals in the Norwegian southeastern health region.

Participants: Patients (18-75 years) with a high proximal DVT, symptoms <21 days, and no increased risk of bleeding were eligible. 189 of 209 recruited patients completed 24 months follow-up.

Interventions: Participants were randomized to additional CDT with alteplase for 1-4 days or to standard treatment only with 6 months anticoagulation and 24 months of compression stockings.

Primary and secondary outcome measures: Planned secondary outcome measures included QOL as assessed with the generic instrument EQ-5D and the disease specific instrument VEINES-QOL/Sym.

Primary outcome measure was post-thrombotic syndrome (PTS) after 24 months.

Results: After 24 months there were no differences in QOL between the additional CDT and standard treatment arms; ~~mean difference for the EQ-5D index was 0.80-0.04 (95% CI 0.746-0.849-0.10-0.17) and 0.84 (95% CI 0.807-0.875), for the VEINES-QOL score was 50.10.2 (95% CI 47.9-52.3-2.8-3.0) and 49.9 (95% CI 48.0-51.8), and for the VEINES-Sym score was 50.3-0.5 (95% CI 48.0-52.5-2.4-3.4); and 49.8 (95% CI 47.9-51.6), respectively~~ (p-values >0.37). Independent of treatment arms, patients with PTS had poorer outcomes than patient without PTS; ~~mean difference for EQ-5D index was 0.770.09 (95% CI 0.730-0.8190.03-0.15) vs. 0.86 (95% CI 0.823-0.903), for VEINES-QOL score was 45.68.6 (95% CI 43.4-47.95.9-11.2) vs. 54.2 (95% CI 52.8-55.6), and for VEINES-Sym score was 45.09.8 (95% CI 7.3-12.342.7-47.2) vs. 54.8 (95% CI 53.5-56.0), respectively;~~ (p-values <0.001).

Conclusions: QOL did not differ between patients treated with additional CDT compared to standard treatment alone. Patients who developed PTS reported poorer QOL and more symptoms than patients without PTS. QOL should be included as an outcome measure in clinical studies on patients at risk of PTS.

Trial registration: NCT00251771



## Article summary

### Article Focus

- Assessment of ~~patient-reported~~ quality of life may provide meaningful information not captured by clinical scores and other traditional health outcome measures.
- Additional catheter-directed thrombolysis for proximal deep vein thrombosis improves long-term clinical outcome by reducing post-thrombotic syndrome and is likely to be a cost-effective alternative to standard treatment alone.
- Our objective was to investigate whether additional thrombolysis also improves long-term quality of life compared to standard treatment alone.

### Key Messages

- Quality of life did not differ between patients allocated thrombolytic therapy compared to control patients who receive standard anticoagulation and compression stockings only.
- Patients who developed post-thrombotic syndrome had poorer generic and disease specific quality of life scores compared to patients without post-thrombotic syndrome.
- Quality of life assessment should be among the long-term outcome measures in clinical research on patients who are at risk of developing post-thrombotic syndrome.

### Strengths and Limitations

- A robust study design where patient reported quality of life was assessed using validated generic and disease-specific instruments within the setting of a multicenter open-label randomized controlled trial.
- The study was designed to detect a difference in the frequency of post-thrombotic syndrome between the two treatment arms and may have been underpowered to detect a clinically meaningful difference in quality of life. Other possible explanations include a relatively small effect on the reduction in post-thrombotic syndrome and the smaller proportion presenting with iliofemoral DVT relative to infrainguinal DVT.
- More frequent study visits and longitudinal assessments of quality of life would have allowed for better explanatory analyses, and may have added to the interpretation of clinically meaningful differences in the disease specific quality of life scores.

## Introduction

Following standard treatment including anticoagulation and compression stockings, still at least 1 in 4 are at risk of developing a post-thrombotic syndrome (PTS) after suffering a proximal deep vein thrombosis (DVT), i.e., DVT in the popliteal vein or above [1-3]. PTS is characterized by persistent pain, heaviness, swelling, and deterioration of the skin. Previously in the CaVenT Study we have shown that additional catheter-directed thrombolysis (CDT) in patients with a high proximal DVT localized in the mid-thigh level or above, and a low risk of bleeding, reduced the frequency of PTS from 56% to 41% (p=0.047) after 2 years and that CDT is likely to be a cost-effective alternative to standard treatment only [4,5]. However, as PTS is a chronic condition associated with substantial morbidity and with no healing treatment options, ~~patient-reported~~ assessment of both generic and disease-specific health-related quality of life (QOL) including the impact on health and daily functioning may provide meaningful information not captured by clinical scores and other traditional health outcome measures. Development of PTS has been shown to be a principal determinant of QOL following DVT of the lower limb; however, there is currently no gold standard for the PTS diagnosis [6]. We aimed at investigating whether additional CDT for a high proximal DVT improved long-term QOL compared to standard treatment alone.

## Materials and methods

### Study population

Patients were recruited as part of the CaVenT study, an open randomized controlled trial (RCT), from 19 hospitals within the South-Eastern Norway Regional Health Authority, which serves a population of 2.6 million people. Patients aged 18–75 years with a first-time objectively verified acute high proximal DVT, defined as thrombus in mid-thigh level or higher, and with a low risk of bleeding, were eligible for

1  
2  
3 inclusion if symptoms had lasted <21 days. Complete eligibility criteria and trial profile have been  
4  
5 reported previously [5,7]. Patients were randomly assigned, using sealed numbered envelopes, to  
6  
7 standard treatment with at least 6 months of anticoagulation and compression stockings for 24 months  
8  
9 or to CDT with alteplase for 1-4 days in addition to standard treatment; the treatment strategies have  
10  
11 previously been reported in detail [5,8]. Prior to treatment allocation, written informed consent was  
12  
13 obtained by the local trial site investigator. The study protocol was approved by the Regional Committee  
14  
15 for Medical and Health Research Ethics and the Norwegian Medicines Agency, and was registered at  
16  
17 [www.clinicaltrials.gov](http://www.clinicaltrials.gov) with the unique trial identifier NCT00251771.  
18  
19  
20  
21

## 22 **Variables and instruments**

### 23 **Long-term quality of life**

24  
25  
26  
27  
28 After 6 and 24 months follow-up the patients completed a self-reporting questionnaire including the  
29  
30 validated Norwegian versions of the generic instrument EQ-5D ([www.euroqol.org](http://www.euroqol.org)) and the disease-  
31  
32 specific QOL instrument VEINES-QOL/Sym [9,10]. The VEINES-QOL/Sym comprises 26 items regarding  
33  
34 problems of the lower limbs [4]. The instrument measures symptoms, limitations in daily activity and  
35  
36 psychological impact during the previous 4 weeks, and change over the past year. Responses are rated  
37  
38 on 2- to 7-point descriptive scales, and two summary scores are computed. The VEINES-QOL summary  
39  
40 score assesses QOL, and the VEINES-Sym score is a subscale that measures symptom severity only.  
41  
42 Higher scores represent better QOL and/or fewer symptoms, and a difference or change of  $\geq 4$  points has  
43  
44 been suggested to represent a clinically meaningful difference [10].  
45  
46  
47  
48

49  
50 The EQ-5D is a preference-based generic instrument for describing and valuing QOL, and is a widely used  
51  
52 health measure outcome in clinical trials and cost-effectiveness and cost-utility analyses. This descriptive  
53  
54 classification system comprises the five items mobility, self-care, activity, pain, and anxiety; each with  
55  
56 the three levels reflecting the patient's status that particular day. The scoring gives a single  
57  
58  
59  
60

1  
2  
3 number/health status index ranging from 0 (dead) to 1 (best possible health). A difference or change in  
4  
5 this index of  $\geq 0.08$  is likely to represent a clinically meaningful difference [11,12].  
6  
7

### 8 9 **Assessment of post-thrombotic syndrome**

10  
11 In the absence of a gold standard for a PTS diagnosis, the Villalta score has been recommended for PTS  
12  
13 assessment in clinical trials [13]. This score includes the five patient-rated symptoms pain, cramps,  
14  
15 heaviness, paresthesia, pruritus, and the six clinician-rated signs edema, skin induration,  
16  
17 hyperpigmentation, pain during calf compression, venous ectasia, and redness. Each sign or symptom is  
18  
19 rated as 0 (none), 1 (mild), 2 (moderate), or 3 (severe), and summed to produce a total score, where less  
20  
21 than 5 indicates no PTS, 5–14 indicates mild or moderate PTS, and 15 or more (or presence of venous  
22  
23 ulcer) indicates severe PTS.  
24  
25  
26  
27

### 28 29 **Statistical analysis and sample size**

30  
31 Health related QOL was among the pre-specified secondary outcomes of the CaVenT Study, while the  
32  
33 primary outcome of PTS after 2 years was the basis for the sample size calculation [7]. For all patients a  
34  
35 EQ-5D summary index was calculated based on values from a Danish population as no Norwegian  
36  
37 algorithm exists [14]. Scores for VEINES-QOL and VEINES-Sym were computed using standard scoring  
38  
39 algorithms obtained from the authors [10]. Statistical analyses were by intention to treat. Any ineligible  
40  
41 patients mistakenly included were excluded. Missing outcome data because of withdrawal of consent or  
42  
43 death from cancer or other causes not related to CDT or anticoagulation were assumed to be missing  
44  
45 independently of treatment received and were not included in the analyses [5]. When comparing  
46  
47  
48  
49 dichotomous variables between groups, a two-sided chi-square test was used. Normal distribution was  
50  
51 tested visually using plots, followed by comparing non-normally distributed continuous variables  
52  
53 between independent groups with a two-sided Mann-Whitney U test. Findings with p-values less than  
54  
55  
56  
57  
58  
59  
60

1  
2  
3 0.05 were deemed statistically significant. The statistical analyses were performed using the statistical  
4  
5 package SPSS, version 18.0 (SPSS Inc, Chicago, IL, USA).  
6  
7

## 8 **Results**

9  
10  
11 209 patients with a high proximal DVT were recruited and randomized to additional CDT or to standard  
12  
13 treatment alone during 2006-2009. Table 1 shows the demographic and clinical characteristics of the 189  
14  
15 patients with complete 2 years follow-up included in the present analysis; 90 in the CDT group and 99  
16  
17 controls. Mean age was 51.5 years (SD 15.8) and 70 (37%) participants were female. Mean duration of  
18  
19 symptoms before diagnosis and start of treatment was 6.6 days (SD 4.6). Most baseline demographic and  
20  
21 clinical characteristics, including VEINES-QOL/Sym and EQ-5D scores, were fairly equally distributed  
22  
23 between the two treatment groups. Figure 1 presents details on the study participants including and  
24  
25 the complete trial profile ~~have been reported elsewhere~~ [5].  
26  
27  
28  
29  
30  
31  
32  
33  
34  
35  
36  
37  
38  
39  
40  
41  
42  
43  
44  
45  
46  
47  
48  
49  
50  
51  
52  
53  
54  
55  
56  
57  
58  
59  
60

Table 1 Demographic and clinical characteristics

|                                                        | Adjunctive catheter-directed thrombolysis (n=90) |               | Standard treatment only (n=99) |               |
|--------------------------------------------------------|--------------------------------------------------|---------------|--------------------------------|---------------|
| Baseline                                               |                                                  |               |                                |               |
| Age (years)                                            | 53.3                                             | (15.7)        | 50.0                           | (15.8)        |
| Women                                                  | 32                                               | (35.6)        | 38                             | (38.4)        |
| Duration of symptoms of acute DVT (days)               | 6.4                                              | (4.4)         | 6.8                            | (4.8)         |
| EQ-5D index                                            | 0.46                                             | (0.372-0.548) | 0.63                           | (0.422-0.844) |
| VEINES-QOL score                                       | 50.2                                             | (48.2-52.3)   | 50.1                           | (47.8-52.4)   |
| VEINES-Sym score                                       | 50.4                                             | (48.4-52.5)   | 49.5                           | (47.2-51.8)   |
| No risk factor for venous thrombosis                   | 31                                               | (34.4)        | 26                             | (26.3)        |
| Transient risk factors for venous thrombosis           |                                                  |               |                                |               |
| Surgery previous 3 months                              | 15                                               | (16.7)        | 13                             | (13.1)        |
| Trauma previous 3 months                               | 10                                               | (11.1)        | 15                             | (15.2)        |
| Short term immobility                                  | 20                                               | (22.2)        | 19                             | (19.2)        |
| Infection previous 6 weeks                             | 6                                                | (6.7)         | 9                              | (9.1)         |
| Pregnancy previous 3 months                            | 5                                                | (5.6)         | 3                              | (3.0)         |
| Hormonal replacement therapy                           | 4                                                | (4.4)         | 6                              | (6.1)         |
| Oral contraceptive pill                                | 3                                                | (3.3)         | 11                             | (11.1)        |
| Permanent risk factors for venous thrombosis           |                                                  |               |                                |               |
| Previous venous thrombosis                             | 9                                                | (10.0)        | 9                              | (9.1)         |
| Cancer                                                 | 3                                                | (3.3)         | 1                              | (1.0)         |
| Obesity                                                | 9                                                | (10.0)        | 11                             | (11.1)        |
| Inflammatory bowel disease                             | 0                                                | (0.0)         | 3                              | (3.0)         |
| 1 <sup>st</sup> degree relative with venous thrombosis | 9                                                | (10.0)        | 13                             | (13.1)        |
| Two risk factors for venous thrombosis                 | 26                                               | (28.9)        | 18                             | (18.2)        |
| Three risk factors for venous thrombosis               | 10                                               | (11.1)        | 14                             | (14.1)        |
| Thrombophilia                                          |                                                  |               |                                |               |
| Heterozygous F5 6025 polymorphism                      | 23                                               | (25.6)        | 22                             | (22.2)        |
| Homozygous F5 6025 polymorphism                        | 1                                                | (1.1)         | 4                              | (4.0)         |
| Other thrombophilic factor(s)                          | 15                                               | (16.7)        | 13                             | (13.1)        |
| At 24 months follow up                                 |                                                  |               |                                |               |
| Daily wear of compression stockings class II           | 57                                               | (63.3)        | 51                             | (51.5)        |
| Recurrent venous thromboembolism                       | 10                                               | (11.1)        | 18                             | (18.2)        |
| Diagnosed with cancer                                  | 4                                                | (4.4)         | 7                              | (7.1)         |

DVT=deep vein thrombosis. Data are mean (SD) for time, mean (95% CI) for scores, or n (%)

Figure 1. Trial Profile

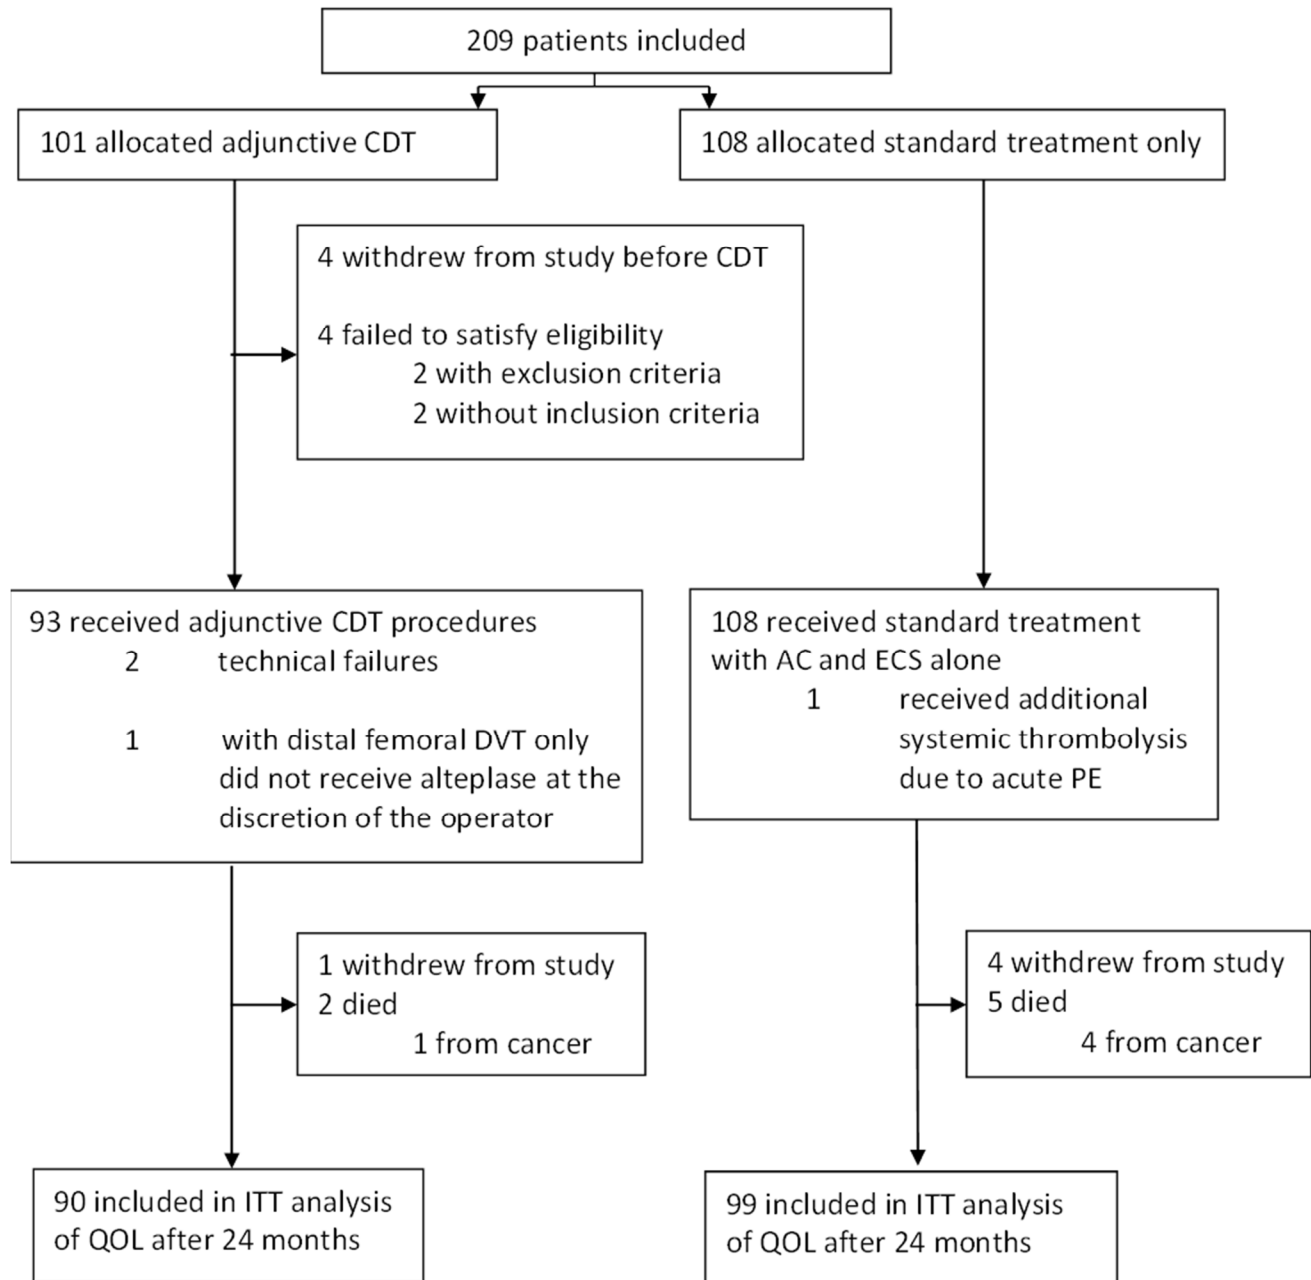

CDT=catheter-directed thrombolysis. VCI=vena cava inferior. AC=anticoagulation. ECS=elastic compression stockings. PE=pulmonary embolism. ITT=intention to treat. QOL=quality of life.

There were no differences between the two treatments groups in mean generic QOL scores, disease-specific QOL scores, or symptom severity score after 24 months follow-up (Table 2). Both VEINES-QOL and VEINES-Sym scores obtained at 6 months follow-up were higher in the CDT arm compared to control patients (p=0.048 and p=0.016, respectively), however, the mean differences of 2.43.2 and 3.22.4 points, respectively, were below the  $\geq 4$  points cut-off for a clinically meaningful difference. The 6 months' EQ-5D score did not differ between the treatment groups. After 24 months follow-up 57 (63.3%) of patients allocated additional CDT reported to wear compression stocking daily vs 51 (51.5%) controls. In the CDT arm 10 (11.1%) experienced a recurrent venous thromboembolism and 4 (4.4%) were diagnosed with cancer. The corresponding numbers among control arm patients were 18 (18.2%) and 7 (7.1%), respectively [5].

Table 2 Generic and disease-specific quality of life and symptom severity according to treatment allocation

|                      |            | Additional catheter-directed thrombolysis (n=90) | Standard treatment only (n=99) | P-value* |
|----------------------|------------|--------------------------------------------------|--------------------------------|----------|
| <b>24 months</b>     |            |                                                  |                                |          |
| Generic QOL          | EQ-5D      | 0.80 (0.746-0.849)                               | 0.84 (0.807-0.875)             | 0.705    |
| Disease-specific QOL | VEINES-QOL | 50.1 (47.9-52.3)                                 | 49.9 (48.0-51.8)               | 0.595    |
|                      | VEINES-Sym | 50.3 (48.0-52.5)                                 | 49.8 (47.9-51.6)               | 0.368    |
| <b>6 months</b>      |            |                                                  |                                |          |
| Generic QOL          | EQ-5D      | 0.82 (0.780-0.856)                               | 0.81 (0.777-0.852)             | 0.893    |
| Disease-specific QOL | VEINES-QOL | 51.3 (49.2-53.4)                                 | 48.9 (46.8-50.9)               | 0.048    |
|                      | VEINES-Sym | 51.7 (49.8-53.7)                                 | 48.5 (46.4-50.6)               | 0.016    |

Data are mean scores (95% CI). \*Mann-Whitney U test



|                             |                   | <u>Additional catheter-directed thrombolysis (n=90)</u> | <u>Standard treatment only (n=99)</u> | <u>Mean difference</u>   | <u>P-value*</u> |
|-----------------------------|-------------------|---------------------------------------------------------|---------------------------------------|--------------------------|-----------------|
| <u>24 months</u>            |                   |                                                         |                                       |                          |                 |
| <u>Generic QOL</u>          | <u>EQ-5D</u>      | <u>0.80 (0.746-0.849)</u>                               | <u>0.84 (0.807-0.875)</u>             | <u>0.04 (-0.01-0.17)</u> | <u>0.705</u>    |
| <u>Disease-specific QOL</u> | <u>VEINES-QOL</u> | <u>50.1 (47.9-52.3)</u>                                 | <u>49.9 (48.0-51.8)</u>               | <u>0.2 (-2.8-3.0)</u>    | <u>0.595</u>    |
|                             | <u>VEINES-Sym</u> | <u>50.3 (48.0-52.5)</u>                                 | <u>49.8 (47.9-51.6)</u>               | <u>0.5 (-2.4-3.4)</u>    | <u>0.368</u>    |
| <u>6 months</u>             |                   |                                                         |                                       |                          |                 |
| <u>Generic QOL</u>          | <u>EQ-5D</u>      | <u>0.82 (0.780-0.856)</u>                               | <u>0.81 (0.777-0.852)</u>             | <u>0.01 (-0.05-0.06)</u> | <u>0.893</u>    |
| <u>Disease-specific QOL</u> | <u>VEINES-QOL</u> | <u>51.3 (49.2-53.4)</u>                                 | <u>48.9 (46.8-50.9)</u>               | <u>2.4 (-0.5-5.3)</u>    | <u>0.048</u>    |
|                             | <u>VEINES-Sym</u> | <u>51.7 (49.8-53.7)</u>                                 | <u>48.5 (46.4-50.6)</u>               | <u>3.2 (0.4-6.1)</u>     | <u>0.016</u>    |

Data are mean values (95% CI). \*Mann Whitney U test

Independent of treatment allocation, the mean VEINES-QOL and VEINES-Sym scores were lower in patients who developed PTS compared to patients without PTS at both 6 and 24 months follow-up (p-values <0.001) (Table 3). The mean differences were 6.0 points after 6 month, and increased to 8.6 and 9.8 points, respectively, after 24 months. The mean EQ-5D index was 0.09 points lower in PTS patients at 24 months follow-up (p<0.001); however, there was no mean difference after 6 months. When looking at the PTS cases only at 24 months follow-up the three scores did not differ between the two treatment groups (p-value >0.8, data not shown).

Table 3 Generic and disease-specific quality of life and symptom severity according to PTS development

|                             |                   | <u>PTS (n=92)</u>         | <u>No-PTS (n=97)</u>      | <u>P-value*</u>  |
|-----------------------------|-------------------|---------------------------|---------------------------|------------------|
| <u>24 months</u>            |                   |                           |                           |                  |
| <u>Generic QOL</u>          | <u>EQ-5D</u>      | <u>0.77 (0.730-0.819)</u> | <u>0.86 (0.823-0.903)</u> | <u>&lt;0.001</u> |
| <u>Disease-specific QOL</u> | <u>VEINES-QOL</u> | <u>45.6 (43.4-47.9)</u>   | <u>54.2 (52.8-55.6)</u>   | <u>&lt;0.001</u> |
|                             | <u>VEINES-Sym</u> | <u>45.0 (42.7-47.2)</u>   | <u>54.8 (53.5-56.0)</u>   | <u>&lt;0.001</u> |
| <u>6 months</u>             |                   |                           |                           |                  |
| <u>Generic QOL</u>          | <u>EQ-5D</u>      | <u>0.80 (0.770-0.837)</u> | <u>0.82 (0.788-0.869)</u> | <u>0.062</u>     |
| <u>Disease-specific QOL</u> | <u>VEINES-QOL</u> | <u>46.8 (44.6-49.0)</u>   | <u>53.0 (51.3-54.7)</u>   | <u>&lt;0.001</u> |
|                             | <u>VEINES-Sym</u> | <u>46.9 (44.6-49.1)</u>   | <u>53.0 (51.4-54.6)</u>   | <u>&lt;0.001</u> |

Data are mean scores (95% CI). \* Mann Whitney U test

|                                                             |                   | <u>PTS (n=92)</u>         | <u>No PTS (n=97)</u>      | <u>Mean difference</u>   | <u>P-value*</u>  |
|-------------------------------------------------------------|-------------------|---------------------------|---------------------------|--------------------------|------------------|
| <u>24 months</u>                                            |                   |                           |                           |                          |                  |
| <u>Generic QOL</u>                                          | <u>EQ-5D</u>      | <u>0.77 (0.730-0.819)</u> | <u>0.86 (0.823-0.903)</u> | <u>0.09 (0.03-0.15)</u>  | <u>&lt;0.001</u> |
| <u>Disease-specific QOL</u>                                 | <u>VEINES-QOL</u> | <u>45.6 (43.4-47.9)</u>   | <u>54.2 (52.8-55.6)</u>   | <u>8.6 (5.9-11.2)</u>    | <u>&lt;0.001</u> |
|                                                             | <u>VEINES-Sym</u> | <u>45.0 (42.7-47.2)</u>   | <u>54.8 (53.5-56.0)</u>   | <u>9.8 (7.3-12.3)</u>    | <u>&lt;0.001</u> |
| <u>6 months</u>                                             |                   |                           |                           |                          |                  |
| <u>Generic QOL</u>                                          | <u>EQ-5D</u>      | <u>0.80 (0.770-0.837)</u> | <u>0.82 (0.788-0.869)</u> | <u>0.02 (-0.08-0.28)</u> | <u>0.062</u>     |
| <u>Disease-specific QOL</u>                                 | <u>VEINES-QOL</u> | <u>46.8 (44.6-49.0)</u>   | <u>53.0 (51.3-54.7)</u>   | <u>6.2 (3.4-9.09)</u>    | <u>&lt;0.001</u> |
|                                                             | <u>VEINES-Sym</u> | <u>46.9 (44.6-49.1)</u>   | <u>53.0 (51.4-54.6)</u>   | <u>6.1 (3.4-8.9)</u>     | <u>&lt;0.001</u> |
| <u>Data are mean values (95% CI). * Mann Whitney U test</u> |                   |                           |                           |                          |                  |

Looking at individual items concerning problems with mobility (EQ-5D) and limitations in daily activities at home, work or during leisure time (VEINES-QOL) there was no differences between the two treatment groups; however patients with PTS reported more problems and limitations than patients without PTS (data not shown).

The proportions of patients that reported clinically meaningful changes over time during the 6 to 24 months follow-up did not differ between the two treatment groups with regards to the two QOL scores, and the majority of patients reported no QOL change (table 4). In both groups 1 in 5 patients reported worsening of the Sym score, and 32% of control patients reported improved symptom severity compared to 16% treated with CDT (p=0.029).

Table 4 Changes in generic and disease-specific quality of life and symptom severity during 6 to 24 months follow-up\*

|                      |                     | Additional catheter-directed thrombolysis (n=90) |                  | Standard treatment only (n=99) |                  | P-value** |
|----------------------|---------------------|--------------------------------------------------|------------------|--------------------------------|------------------|-----------|
|                      |                     | n                                                | % (95% CI)       | n                              | % (95% CI)       |           |
| Generic QOL          | EQ-5D improved      | 15                                               | 16.7 (10.0-24.4) | 24                             | 24.5 (16.6-33.4) | 0.233     |
|                      | EQ-5D worsened      | 22                                               | 24.4 (16.4-34.1) | 16                             | 16.3 (9.9-24.4)  |           |
| Disease-specific QOL | VEINES-QOL improved | 17                                               | 19.5 (11.8-28.0) | 27                             | 27.3 (19.2-36.7) | 0.462     |
|                      | VEINES-QOL worsened | 19                                               | 21.8 (13.6-30.4) | 19                             | 19.2 (12.3-27.8) |           |
|                      | VEINES-Sym improved | 14                                               | 15.9 (9.1-24.2)  | 32                             | 32.3 (23.7-42.0) | 0.029     |
|                      | VEINES-Sym worsened | 20                                               | 22.7 (14.5-31.7) | 21                             | 21.2 (14.0-30.1) |           |
|                      |                     | PTS (n=92)                                       |                  | No PTS (n=97)                  |                  | P-value*  |
|                      |                     | n                                                | % (95% CI)       | n                              | % (95% CI)       |           |
| Generic QOL          | EQ-5D improved      | 15                                               | 16.5 (9.8-24.9)  | 24                             | 24.7 (16.9-34.0) | 0.041     |
|                      | EQ-5D worsened      | 25                                               | 27.5 (18.8-36.9) | 13                             | 13.4 (7.7-21.3)  |           |
| Disease-specific QOL | VEINES-QOL improved | 21                                               | 23.3 (15.1-32.2) | 23                             | 24.0 (16.1-32.9) | 0.017     |
|                      | VEINES-QOL worsened | 26                                               | 28.9 (19.8-38.1) | 12                             | 12.5 (6.9-20.1)  |           |
|                      | VEINES-Sym improved | 20                                               | 22.0 (14.2-31.0) | 26                             | 27.1 (18.7-36.3) | 0.017     |
|                      | VEINES-Sym worsened | 28                                               | 30.8 (21.7-40.4) | 12                             | 13.5 (7.7-21.3)  |           |

\*A meaningful change was defined as  $\geq 4$  points for VEINES-QOL/Sym scores and  $\geq 0.08$  for the EQ-5D index; improvement or worsening below this was registered as no change. \*\*chi-square test

Correspondingly, when comparing proportions with meaningful changes in the three different scores during follow-up in patients with and without development of PTS independent of treatment allocation, the EQ-5D and VEINES-QOL scores worsened in nearly 30% of patients with PTS compared to 13% of patients who did not develop PTS ( $p=0.041$  and  $p=0.017$ , respectively)(table 4). Finally, 31% patients with PTS reported worsening of the Sym score compared to 14% of patients without PTS ( $p=0.017$ ).

## Discussion

We have previously shown that after a high proximal DVT additional CDT reduces the frequency of PTS [5]. Nevertheless, in the present report we found no differences in long-term QOL between patients

1  
2  
3 treated with additional CDT compared to patients who received standard treatment with anticoagulation  
4  
5 and compression stockings alone. However, patients who developed PTS after 24 months reported  
6  
7 poorer QOL with both EQ-5D and VEINES-QOL, and more symptoms on Sym score compared to patients  
8  
9 without PTS. This finding is in line with other reports, and the VEINES-QOL/Sym scores were in similar  
10  
11 ranges as previously reported in DVT populations [6,15-17].  
12  
13

14  
15 To our knowledge we are the first to investigate QOL after CDT in a well-designed study using validated  
16  
17 QOL instruments and PTS assessment. We have recently in a retrospective study of 71 patients  
18  
19 previously treated with CDT shown that VEINES-QOL/Sym scores were poorer in patients with  
20  
21 established PTS compared to no PTS (median) 6 years after the index DVT, and poorer in patients  
22  
23 compared to a control group without previous DVT [17]. Another retrospective study of corresponding  
24  
25 size found improved QOL and less post-thrombotic symptoms in patients treated with CDT compared to  
26  
27 similar patients treated with anticoagulation only; however, this study did not use a disease-specific QOL  
28  
29 instrument or a validated assessment of PTS [18]. This finding was not supported in our RCT, and long-  
30  
31 term QOL may not represent a significant secondary efficacy outcome after CDT.  
32  
33  
34  
35

36  
37 The baseline scores were obtained within 1-2 days following the verification of the acute DVT, and the  
38  
39 low EQ-5D scores are likely to reflect the patients' medical emergency situation at that time point. The  
40  
41 items of the VEINES instrument are concerned with "the last 4 weeks" and mean symptom duration  
42  
43 among study participants was only 6-7 days and, as indicated by the relatively better scores, the VEINES-  
44  
45 QOL/Sym baseline results are likely to reflect a longer period including time before symptom onset.  
46  
47

48  
49 Finally, QOL is a more appropriate outcome for chronic conditions, and together with our lack of more  
50  
51 frequent study visits and longitudinal assessments, we did not include baseline scores in our analyses.  
52  
53

54  
55 The finding that more control patients reported a meaningful improvement in the Sym score during  
56  
57 follow-up than patients treated with CDT, should be interpreted with caution as the 6 months Sym score  
58  
59  
60

1  
2  
3 was higher in the CDT arm, though this difference did not reach a meaningful difference of at least 4  
4  
5 points.  
6  
7

8  
9 We regard our study population to be representative and the CDT procedure to be applicable in a clinical  
10  
11 setting [5]. However, due to the open label design, bias in patient reported outcomes like QOL cannot be  
12  
13 excluded, and it is uncertain in what direction such bias would impact the results. As our eligibility  
14  
15 criteria allowed for study participants to enroll with up to 21 days of symptoms, this meant that patients  
16  
17 with sub-acute DVT, that is more than 14 days of symptoms, may have entered the study and possibly  
18  
19 contributed to the overall high PTS frequency and lack of treatment group differences in the QOL scores  
20  
21 [19]. However, as the mean symptom duration was less than 7 days and only 15 patients (hereunder 8  
22  
23 controls) had more than 14 days of symptom, we find this unlikely. Finally, two ongoing RCTs; the  
24  
25 American ATTRACT study and the DUTCH CAVA trial, will provide additional data to the field of QOL after  
26  
27 CDT treatment ([www.clinicaltrials.gov](http://www.clinicaltrials.gov); NCT 00790335 and NCT 00970619).  
28  
29

30  
31  
32 The Villalta scale has been validated and recommended for assessment of PTS [13,20], however, as no  
33  
34 gold standard exists and a relatively high frequency of PTS was found in both treatment arms, concerns  
35  
36 have been raised about the clinical benefit of CDT as shown in the CaVenT study [5,21]. The present  
37  
38 findings of poorer QOL in those who developed PTS, as obtained within an appropriately designed RCT,  
39  
40 underpin our perception that the 15% absolute reduction in PTS as assessed with the Villalta scale and  
41  
42 shown in CaVenT, does represent a clinically meaningful effect of additional CDT [5].  
43  
44  
45

46  
47 It has been recommended to include QOL as part of the long-term follow-up assessment of patients at  
48  
49 risk of PTS [6], and a recent review “recommend(s) that the Villalta score combined with a venous  
50  
51 disease-specific quality-of-life questionnaire be considered as the “gold standard” for the diagnosis and  
52  
53 classification of PTS” [22]. The VEINES questionnaire would be a candidate, but such a combination must  
54  
55 be validated in properly designed studies and take into account the apparent overlap between the  
56  
57  
58  
59  
60

1  
2  
3 Villalta score and the VEINES-scores; all items in the Sym score are covered in the QOL score, 2/3 of Sym  
4  
5 items are covered in Villalta, and 1/4 of the QOL items are covered in Villalta. Finally, 5 of 11 items in  
6  
7 Villalta score, i.e., the symptom rating, are in fact patient reported outcomes (PRO), and combining with  
8  
9 another patient PRO instrument should seek to avoid assessing the same thing twice over.  
10  
11

12  
13 The generic instrument EQ-5D showed a clinically meaningful and statistically significant poorer QOL  
14  
15 measure in patients who developed PTS, indicating that this preference based questionnaire can be  
16  
17 included in studies on PTS and thereby allowing analyses on utilities and cost-effectiveness for decision  
18  
19 making [23]. However, the sample size was powered to detect a 15% reduction in PTS after additional  
20  
21 CDT, not improvement in QOL, which was among the secondary outcome measures. Accordingly, the  
22  
23 negative finding in terms of no difference in QOL between the treatment arms, may relate to the  
24  
25 sensitivity of the instruments, the prevalence of PTS, and the lack of power to detect a statistically  
26  
27 significant difference. Finally, the VEINES scores differed significantly between patients with PTS vs. no  
28  
29 PTS, and the magnitude of the mean difference was 6 points or higher. This has been reported to  
30  
31 represent meaningful differences, but a well-established definition or cut-off for a clinically meaningful  
32  
33 difference in VEINES scores is lacking, and also this limitation must be taken into account when  
34  
35 interpreting the results [10].  
36  
37  
38  
39  
40

41  
42 In conclusion, there was no difference in long-term QOL between patients with a high proximal DVT  
43  
44 treated with additional CDT compared to those treated with anticoagulation and compression therapy  
45  
46 alone. Patients who developed PTS reported poorer QOL and more symptoms than patients without PTS.  
47  
48 This is in line with previous reports, and supports the use of QOL as an outcome measure in clinical  
49  
50 research on patients who are at risk of PTS.  
51  
52  
53  
54  
55  
56  
57  
58  
59  
60

### Addendum: role of each author

T Enden: Design of study, acquisition of data, analysis and interpretation of data, drafting of manuscript, critical revision of manuscript, obtaining funding

H S Wik: Acquisition of data, interpretation of data, critical revision of manuscript

A K Kvam: Interpretation of data, and critical revision of manuscript

Y Haig: Acquisition of data and critical revision of manuscript

N E Kløw: Design of study, acquisition of data, critical revision of manuscript, obtaining funding

P M Sandset: Design of study, acquisition of data, critical revision of manuscript, obtaining funding

### Acknowledgements

We want to thank all study participants and study collaborators; without their contributions the CaVenT study would not have been feasible.

### Disclosure of Conflicts of Interests

The authors state that they have no conflict of interest.

### Funding

This work was funded by South-Eastern Norway Regional Health Authority, Research Council of Norway, University of Oslo and Oslo University Hospital, and the Unger-Vetlesen Medical Fund. The funding bodies played no role in the design and conduct of the study, the collection, management, analysis, interpretation and reporting of study data, or the writing or submission of the manuscript.

## References

- 1 Prandoni P, Lensing AW, Prins MH, Frulla M, Marchiori A, Bernardi E, et al. Below-knee elastic compression stockings to prevent the post-thrombotic syndrome: a randomized, controlled trial. *Ann Intern Med* 2004;141:249-56.
- 2 Brandjes DP, Buller HR, Heijboer H, Huisman MV, de RM, Jagt H, et al. Randomised trial of effect of compression stockings in patients with symptomatic proximal-vein thrombosis. *Lancet* 1997;349:759-62.
- 3 Kearon C, Akl EA, Comerota AJ, Prandoni P, Bounameaux H, Oldhaber SZ, et al. Antithrombotic therapy for VTE disease: Antithrombotic Therapy and Prevention of Thrombosis, 9th ed: American College of Chest Physicians Evidence-Based Clinical Practice Guidelines. *Chest* 2012;141:e419S-e494S.
- 4 Enden T, Resch S, White C, Wik HS, Klow NE, Sandset PM. Cost-Effectiveness of Additional Catheter-Directed Thrombolysis for Deep Vein Thrombosis. *J Thromb Haemost* 2013.
- 5 Enden T, Haig Y, Klow NE, Slagsvold CE, Sandvik L, Ghanima W, et al. Long-term outcome after additional catheter-directed thrombolysis versus standard treatment for acute iliofemoral deep vein thrombosis (the CaVenT study): a randomised controlled trial. *Lancet* 2012;379:31-8.
- 6 Kahn SR, Shbaklo H, Lamping DL, Holcroft CA, Shrier I, Miron MJ, et al. Determinants of health-related quality of life during the 2 years following deep vein thrombosis. *J Thromb Haemost* 2008;6:1105-12.
- 7 Enden T, Sandvik L, Klow NE, Hafsaahl G, Holme PA, Holmen LO, et al. Catheter-directed Venous Thrombolysis in acute iliofemoral vein thrombosis-the CaVenT Study: Rationale and design of a multicenter, randomized, controlled, clinical trial (NCT00251771). *Am Heart J* 2007;154:808-14.
- 8 Enden T, Klow NE, Sandvik L, Slagsvold CE, Ghanima W, Hafsaahl G, et al. Catheter-directed thrombolysis vs. anticoagulant therapy alone in deep vein thrombosis: results of an open randomized, controlled trial reporting on short-term patency. *J Thromb Haemost* 2009;7:1268-75.
- 9 Enden T, Garratt AM, Klow NE, Sandset PM. Assessing burden of illness following acute deep vein thrombosis: data quality, reliability and validity of the Norwegian version of VEINES-QOL/Sym, a disease-specific questionnaire. *Scand J Caring Sci* 2009;369-74.
- 10 Lamping DL, Schroter S, Kurz X, Kahn SR, Abenhaim L. Evaluation of outcomes in chronic venous disorders of the leg: development of a scientifically rigorous, patient-reported measure of symptoms and quality of life. *J Vasc Surg* 2003;37:410-9.
- 11 Walters SJ, Brazier JE. Comparison of the minimally important difference for two health state utility measures: EQ-5D and SF-6D. *Qual Life Res* 2005;14:1523-32.
- 12 Pickard AS, Neary MP, Cella D. Estimation of minimally important differences in EQ-5D utility and VAS scores in cancer. *Health Qual Life Outcomes* 2007;5:70.



- 1  
2  
3 13 Kahn SR, Partsch H, Vedantham S, Prandoni P, Kearon C. Definition of post-thrombotic syndrome  
4 of the leg for use in clinical investigations: a recommendation for standardization. *J Thromb*  
5 *Haemost* 2009;7:879-83.  
6  
7  
8 14 Wittrup-Jensen KU, Lauridsen J, Gudex C, Pedersen KM. Generation of a Danish TTO value set for  
9 EQ-5D health states. *Scand J Public Health* 2009;37:459-66.  
10  
11 15 Kahn SR, Ducruet T, Lamping DL, Arsenault L, Miron MJ, Roussin A, et al. Prospective evaluation of  
12 health-related quality of life in patients with deep venous thrombosis. *Arch Intern Med*  
13 2005;165:1173-8.  
14  
15 16 Broholm R, Sillesen H, Damsgaard MT, Jorgensen M, Just S, Jensen LP, et al. Postthrombotic  
16 syndrome and quality of life in patients with iliofemoral venous thrombosis treated with catheter-  
17 directed thrombolysis. *J Vasc Surg* 2011;54:18S-25S.  
18  
19 17 Ghanima W, Kleven IW, Enden T, Rosales A, Wik HS, Pederstad L, et al. Recurrent venous  
20 thrombosis, post-thrombotic syndrome and quality of life after catheter-directed thrombolysis in  
21 severe proximal deep vein thrombosis. *J Thromb Haemost* 2011;9:1261-3.  
22  
23 18 Comerota AJ. Quality-of-life improvement using thrombolytic therapy for iliofemoral deep venous  
24 thrombosis. *Rev Cardiovasc Med* 2002;3 Suppl 2:S61-S67.  
25  
26 19 Vedantham S, Grassi CJ, Ferral H, Patel NH, Thorpe PE, Antonacci VP, et al. Reporting standards for  
27 endovascular treatment of lower extremity deep vein thrombosis. *J Vasc Interv Radiol*  
28 2009;20:S391-S408.  
29  
30 20 Kahn SR. Measurement properties of the Villalta scale to define and classify the severity of the  
31 post-thrombotic syndrome. *J Thromb Haemost* 2009;7:884-8.  
32  
33 21 Hofmann LV, Kuo WT. Catheter-directed thrombolysis for acute DVT. *Lancet* 2012;379:3-4.  
34  
35 22 Soosainathan A, Moore HM, Gohel MS, Davies AH. Scoring systems for the post-thrombotic  
36 syndrome. *J Vasc Surg* 2012;57:254-61.  
37  
38 23 Drummond MF, Sculpher M, et al. *Methods for the Economic Evaluation of Health Care*  
39 *Programmes*. 3rd ed. 2006.  
40  
41  
42  
43  
44  
45  
46  
47  
48  
49  
50  
51  
52  
53  
54  
55  
56  
57  
58  
59  
60

1  
2  
3  
4  
5 **Health-related quality of life after catheter-directed thrombolysis for**  
6  
7  
8 **deep vein thrombosis: secondary outcomes of the randomised, non-**  
9  
10  
11 **blinded, parallel-group CaVenT study**  
12  
13

14  
15  
16  
17 Tone Enden\*†, Hilde Skuterud Wik\*§, Ann Kristin Kvam\*, Ylva Haig†§, Nils Einar Kløw†§, Per Morten  
18  
19 Sandset\*§  
20

21  
22 \*Department of haematology, Oslo University Hospital, Oslo, Norway  
23

24  
25 †Department of radiology, Oslo University Hospital, Oslo, Norway  
26

27  
28 §Institute of Clinical Medicine, University of Oslo, Oslo, Norway  
29  
30

31  
32  
33 Corresponding author: Tone Enden, Department of radiology, Oslo University Hospital, Postboks 4950  
34  
35 Nydalen, 0424 OSLO, Norway, phone +47 915 02770, fax +47 22 11 92 40  
36  
37

38  
39  
40 **Keywords:** health outcomes, post-thrombotic syndrome, quality of life, venous thrombosis, thrombolytic  
41  
42 therapy  
43  
44

45  
46 Word count: 2309 words in main text  
47  
48  
49  
50  
51  
52  
53  
54  
55  
56  
57  
58  
59  
60

## Summary:

Objectives: To investigate whether additional catheter-directed thrombolysis (CDT) improves long-term quality of life (QOL) compared to standard treatment with anticoagulation and compression stockings alone in patients with proximal deep vein thrombosis (DVT).

Design: Open-label randomised controlled trial.

Setting: 19 hospitals in the Norwegian southeastern health region.

Participants: Patients (18-75 years) with a high proximal DVT, symptoms <21 days, and no increased risk of bleeding were eligible. 189 of 209 recruited patients completed 24 months follow-up.

Interventions: Participants were randomized to additional CDT with alteplase for 1-4 days or to standard treatment only with 6 months anticoagulation and 24 months of compression stockings.

Primary and secondary outcome measures: Planned secondary outcome measures included QOL as assessed with the generic instrument EQ-5D and the disease specific instrument VEINES-QOL/Sym. Primary outcome measure was post-thrombotic syndrome (PTS) after 24 months.

Results: After 24 months there were no differences in QOL between the additional CDT and standard treatment arms; mean difference for the EQ-5D index was 0.04 (95% CI -0.10-0.17), for the VEINES-QOL score 0.2 (95% CI -2.8-3.0), and for the VEINES-Sym score 0.5 (95% CI -2.4-3.4);(p-values >0.37). Independent of treatment arms, patients with PTS had poorer outcomes than patient without PTS; mean difference for EQ-5D was 0.09 (95% CI 0.03-0.15) , for VEINES-QOL score 8.6 (95% CI 5.9-11.2) , and for VEINES-Sym score 9.8 (95% CI 7.3-12.3); (p-values <0.001).

Conclusions: QOL did not differ between patients treated with additional CDT compared to standard treatment alone. Patients who developed PTS reported poorer QOL and more symptoms than patients without PTS. QOL should be included as an outcome measure in clinical studies on patients at risk of PTS.

Trial registration: NCT00251771

## Article summary

### Article Focus

- Assessment of quality of life may provide meaningful information not captured by clinical scores and other traditional health outcome measures.
- Additional catheter-directed thrombolysis for proximal deep vein thrombosis improves long-term clinical outcome by reducing post-thrombotic syndrome and is likely to be a cost-effective alternative to standard treatment alone.
- Our objective was to investigate whether additional thrombolysis also improves long-term quality of life compared to standard treatment alone.

### Key Messages

- Quality of life did not differ between patients allocated thrombolytic therapy compared to control patients who receive standard anticoagulation and compression stockings only.
- Patients who developed post-thrombotic syndrome had poorer generic and disease specific quality of life scores compared to patients without post-thrombotic syndrome.
- Quality of life assessment should be among the long-term outcome measures in clinical research on patients who are at risk of developing post-thrombotic syndrome.

### Strengths and Limitations

- A robust study design where patient reported quality of life was assessed using validated generic and disease-specific instruments within the setting of a multicenter open-label randomized controlled trial.
- The study was designed to detect a difference in the frequency of post-thrombotic syndrome between the two treatment arms and may have been underpowered to detect a clinically meaningful difference in quality of life. Other possible explanations include a relatively small effect on the reduction in post-thrombotic syndrome and the smaller proportion presenting with iliofemoral DVT relative to infrainguinal DVT.
- More frequent study visits and longitudinal assessments of quality of life would have allowed for better explanatory analyses, and may have added to the interpretation of clinically meaningful differences in the disease specific quality of life scores.

## Introduction

Following standard treatment including anticoagulation and compression stockings, still at least 1 in 4 are at risk of developing a post-thrombotic syndrome (PTS) after suffering a proximal deep vein thrombosis (DVT), i.e., DVT in the popliteal vein or above [1-3]. PTS is characterized by persistent pain, heaviness, swelling, and deterioration of the skin. Previously in the CaVenT Study we have shown that additional catheter-directed thrombolysis (CDT) in patients with a high proximal DVT localized in the mid-thigh level or above, and a low risk of bleeding, reduced the frequency of PTS from 56% to 41% ( $p=0.047$ ) after 2 years and that CDT is likely to be a cost-effective alternative to standard treatment only [4,5]. However, as PTS is a chronic condition associated with substantial morbidity and with no healing treatment options, assessment of both generic and disease-specific health-related quality of life (QOL) including the impact on health and daily functioning may provide meaningful information not captured by clinical scores and other traditional health outcome measures. Development of PTS has been shown to be a principal determinant of QOL following DVT of the lower limb; however, there is currently no gold standard for the PTS diagnosis [6]. We aimed at investigating whether additional CDT for a high proximal DVT improved long-term QOL compared to standard treatment alone.

## Materials and methods

### Study population

Patients were recruited as part of the CaVenT study, an open randomized controlled trial (RCT), from 19 hospitals within the South-Eastern Norway Regional Health Authority, which serves a population of 2.6 million people. Patients aged 18–75 years with a first-time objectively verified acute high proximal DVT, defined as thrombus in mid-thigh level or higher, and with a low risk of bleeding, were eligible for inclusion if symptoms had lasted <21 days. Complete eligibility criteria and trial profile have been

1  
2  
3 reported previously [5,7]. Patients were randomly assigned, using sealed numbered envelopes, to  
4  
5 standard treatment with at least 6 months of anticoagulation and compression stockings for 24 months  
6  
7 or to CDT with alteplase for 1-4 days in addition to standard treatment; the treatment strategies have  
8  
9 previously been reported in detail [5,8]. Prior to treatment allocation, written informed consent was  
10  
11 obtained by the local trial site investigator. The study protocol was approved by the Regional Committee  
12  
13 for Medical and Health Research Ethics and the Norwegian Medicines Agency, and was registered at  
14  
15 [www.clinicaltrials.gov](http://www.clinicaltrials.gov) with the unique trial identifier NCT00251771.  
16  
17

## 18 19 20 **Variables and instruments**

### 21 22 **Long-term quality of life**

23  
24  
25 After 6 and 24 months follow-up the patients completed a self-reporting questionnaire including the  
26  
27 validated Norwegian versions of the generic instrument EQ-5D ([www.euroqol.org](http://www.euroqol.org)) and the disease-  
28  
29 specific QOL instrument VEINES-QOL/Sym [9,10]. The VEINES-QOL/Sym comprises 26 items regarding  
30  
31 problems of the lower limbs [4]. The instrument measures symptoms, limitations in daily activity and  
32  
33 psychological impact during the previous 4 weeks, and change over the past year. Responses are rated  
34  
35 on 2- to 7-point descriptive scales, and two summary scores are computed. The VEINES-QOL summary  
36  
37 score assesses QOL, and the VEINES-Sym score is a subscale that measures symptom severity only.  
38  
39 Higher scores represent better QOL and/or fewer symptoms, and a difference or change of  $\geq 4$  points has  
40  
41 been suggested to represent a clinically meaningful difference [10].  
42  
43  
44  
45

46  
47 The EQ-5D is a preference-based generic instrument for describing and valuing QOL, and is a widely used  
48  
49 health measure outcome in clinical trials and cost-effectiveness and cost-utility analyses. This descriptive  
50  
51 classification system comprises the five items mobility, self-care, activity, pain, and anxiety; each with  
52  
53 the three levels reflecting the patient's status that particular day. The scoring gives a single  
54  
55  
56  
57  
58  
59  
60

1  
2  
3 number/health status index ranging from 0 (dead) to 1 (best possible health). A difference or change in  
4  
5 this index of  $\geq 0.08$  is likely to represent a clinically meaningful difference [11,12].  
6  
7

### 8 9 **Assessment of post-thrombotic syndrome**

10  
11 In the absence of a gold standard for a PTS diagnosis, the Villalta score has been recommended for PTS  
12  
13 assessment in clinical trials [13]. This score includes the five patient-rated symptoms pain, cramps,  
14  
15 heaviness, paresthesia, pruritus, and the six clinician-rated signs edema, skin induration,  
16  
17 hyperpigmentation, pain during calf compression, venous ectasia, and redness. Each sign or symptom is  
18  
19 rated as 0 (none), 1 (mild), 2 (moderate), or 3 (severe), and summed to produce a total score, where less  
20  
21 than 5 indicates no PTS, 5–14 indicates mild or moderate PTS, and 15 or more (or presence of venous  
22  
23 ulcer) indicates severe PTS.  
24  
25  
26  
27

### 28 29 **Statistical analysis and sample size**

30  
31 Health related QOL was among the pre-specified secondary outcomes of the CaVenT Study, while the  
32  
33 primary outcome of PTS after 2 years was the basis for the sample size calculation [7]. For all patients a  
34  
35 EQ-5D summary index was calculated based on values from a Danish population as no Norwegian  
36  
37 algorithm exists [14]. Scores for VEINES-QOL and VEINES-Sym were computed using standard scoring  
38  
39 algorithms obtained from the authors [10]. Statistical analyses were by intention to treat. Any ineligible  
40  
41 patients mistakenly included were excluded. Missing outcome data because of withdrawal of consent or  
42  
43 death from cancer or other causes not related to CDT or anticoagulation were assumed to be missing  
44  
45 independently of treatment received and were not included in the analyses [5]. When comparing  
46  
47 dichotomous variables between groups, a two-sided chi-square test was used. Normal distribution was  
48  
49 tested visually using plots, followed by comparing non-normally distributed continuous variables  
50  
51 between independent groups with a two-sided Mann-Whitney U test. Findings with p-values less than  
52  
53  
54  
55  
56  
57  
58  
59  
60

1  
2  
3 0.05 were deemed statistically significant. The statistical analyses were performed using the statistical  
4  
5 package SPSS, version 18.0 (SPSS Inc, Chicago, IL, USA).  
6  
7

## 8 9 **Results**

10  
11 209 patients with a high proximal DVT were recruited and randomized to additional CDT or to standard  
12  
13 treatment alone during 2006-2009. Table 1 shows the demographic and clinical characteristics of the 189  
14  
15 patients with complete 2 years follow-up included in the present analysis; 90 in the CDT group and 99  
16  
17 controls. Mean age was 51.5 years (SD 15.8) and 70 (37%) participants were female. Mean duration of  
18  
19 symptoms before diagnosis and start of treatment was 6.6 days (SD 4.6). Most baseline demographic and  
20  
21 clinical characteristics, including VEINES-QOL/Sym and EQ-5D scores, were fairly equally distributed  
22  
23 between the two treatment groups. Figure 1 presents details on the study participants and the complete  
24  
25 trial profile [5].  
26  
27  
28  
29  
30  
31  
32  
33  
34  
35  
36  
37  
38  
39  
40  
41  
42  
43  
44  
45  
46  
47  
48  
49  
50  
51  
52  
53  
54  
55  
56  
57  
58  
59  
60



Table 1 Demographic and clinical characteristics

|                                                        | Adjunctive catheter-directed thrombolysis (n=90) |        | Standard treatment only (n=99) |        |
|--------------------------------------------------------|--------------------------------------------------|--------|--------------------------------|--------|
| Baseline                                               |                                                  |        |                                |        |
| Age (years)                                            | 53.3                                             | (15.7) | 50.0                           | (15.8) |
| Women                                                  | 32                                               | (35.6) | 38                             | (38.4) |
| Duration of symptoms of acute DVT (days)               | 6.4                                              | (4.4)  | 6.8                            | (4.8)  |
| EQ-5D index                                            | 0.46 (0.39)                                      |        | 0.63 (0.99)                    |        |
| VEINES-QOL score                                       | 50.2 (9.3)                                       |        | 50.1 (10.7)                    |        |
| VEINES-Sym score                                       | 50.4 (9.3)                                       |        | 49.5 (10.7)                    |        |
| No risk factor for venous thrombosis                   | 31                                               | (34.4) | 26                             | (26.3) |
| Transient risk factors for venous thrombosis           |                                                  |        |                                |        |
| Surgery previous 3 months                              | 15                                               | (16.7) | 13                             | (13.1) |
| Trauma previous 3 months                               | 10                                               | (11.1) | 15                             | (15.2) |
| Short term immobility                                  | 20                                               | (22.2) | 19                             | (19.2) |
| Infection previous 6 weeks                             | 6                                                | (6.7)  | 9                              | (9.1)  |
| Pregnancy previous 3 months                            | 5                                                | (5.6)  | 3                              | (3.0)  |
| Hormonal replacement therapy                           | 4                                                | (4.4)  | 6                              | (6.1)  |
| Oral contraceptive pill                                | 3                                                | (3.3)  | 11                             | (11.1) |
| Permanent risk factors for venous thrombosis           |                                                  |        |                                |        |
| Previous venous thrombosis                             | 9                                                | (10.0) | 9                              | (9.1)  |
| Cancer                                                 | 3                                                | (3.3)  | 1                              | (1.0)  |
| Obesity                                                | 9                                                | (10.0) | 11                             | (11.1) |
| Inflammatory bowel disease                             | 0                                                | (0.0)  | 3                              | (3.0)  |
| 1 <sup>st</sup> degree relative with venous thrombosis | 9                                                | (10.0) | 13                             | (13.1) |
| Two risk factors for venous thrombosis                 | 26                                               | (28.9) | 18                             | (18.2) |
| Three risk factors for venous thrombosis               | 10                                               | (11.1) | 14                             | (14.1) |
| Thrombophilia                                          |                                                  |        |                                |        |
| Heterozygous F5 6025 polymorphism                      | 23                                               | (25.6) | 22                             | (22.2) |
| Homozygous F5 6025 polymorphism                        | 1                                                | (1.1)  | 4                              | (4.0)  |
| Other thrombophilic factor(s)                          | 15                                               | (16.7) | 13                             | (13.1) |

DVT=deep vein thrombosis. Data are mean (SD) or n (%)

Figure 1. Trial Profile

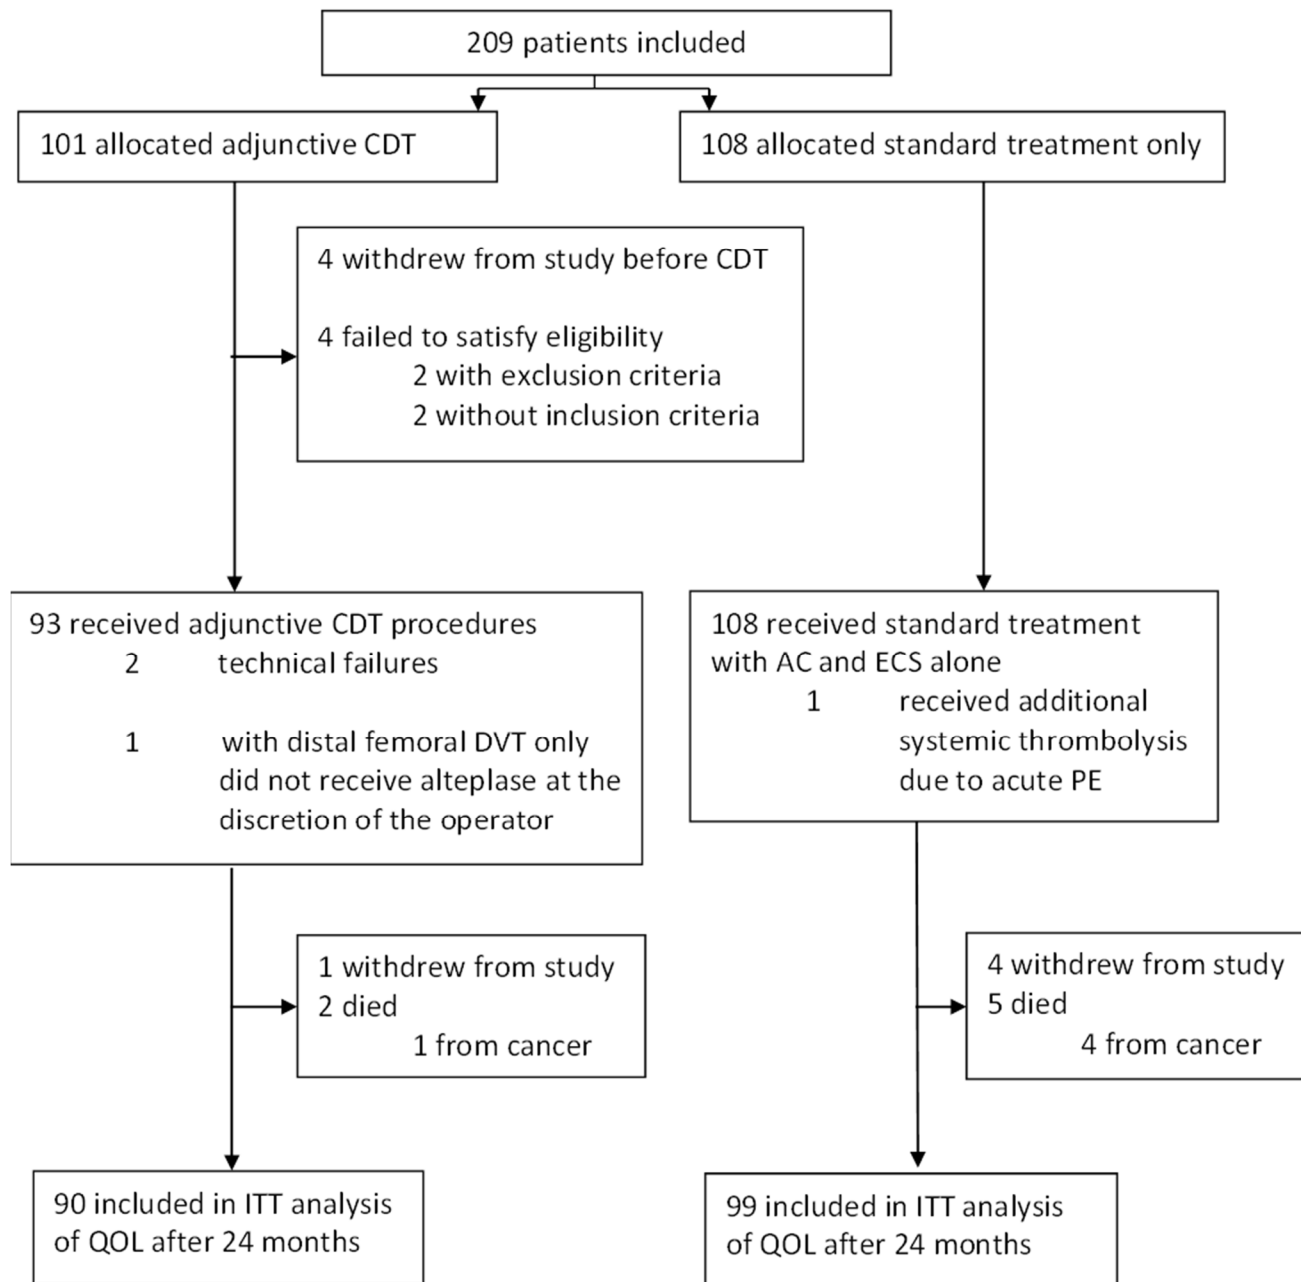

CDT=catheter-directed thrombolysis. VCI=vena cava inferior. AC=anticoagulation. ECS=elastic compression stockings. PE=pulmonary embolism. ITT=intention to treat. QOL=quality of life.

There were no differences between the two treatments groups in mean generic QOL scores, disease-specific QOL scores, or symptom severity score after 24 months follow-up (Table 2). Both VEINES-QOL and VEINES-Sym scores obtained at 6 months follow-up were higher in the CDT arm compared to control patients ( $p=0.048$  and  $p=0.016$ , respectively), however, the mean differences of 2.4 and 3.2 points, respectively, were below the  $\geq 4$  points cut-off for a clinically meaningful difference. The 6 months' EQ-5D score did not differ between the treatment groups. After 24 months follow-up 57 (63.3%) of patients allocated additional CDT reported to wear compression stocking daily vs 51 (51.5%) controls. In the CDT arm 10 (11.1%) experienced a recurrent venous thromboembolism and 4 (4.4%) were diagnosed with cancer. The corresponding numbers among control arm patients were 18 (18.2%) and 7 (7.1%), respectively [5].

Table 2 Generic and disease-specific quality of life and symptom severity according to treatment allocation

|                      |            | Additional catheter-directed thrombolysis (n=90) | Standard treatment only (n=99) | Mean difference   | P-value* |
|----------------------|------------|--------------------------------------------------|--------------------------------|-------------------|----------|
| 24 months            |            |                                                  |                                |                   |          |
| Generic QOL          | EQ-5D      | 0.80 (0.746-0.849)                               | 0.84 (0.807-0.875)             | 0.04 (-0.01-0.17) | 0.705    |
| Disease-specific QOL | VEINES-QOL | 50.1 (47.9-52.3)                                 | 49.9 (48.0-51.8)               | 0.2 (-2.8-3.0)    | 0.595    |
|                      | VEINES-Sym | 50.3 (48.0-52.5)                                 | 49.8 (47.9-51.6)               | 0.5 (-2.4-3.4)    | 0.368    |
| 6 months             |            |                                                  |                                |                   |          |
| Generic QOL          | EQ-5D      | 0.82 (0.780-0.856)                               | 0.81 (0.777-0.852)             | 0.01 (-0.05-0.06) | 0.893    |
| Disease-specific QOL | VEINES-QOL | 51.3 (49.2-53.4)                                 | 48.9 (46.8-50.9)               | 2.4 (-0.5-5.3)    | 0.048    |
|                      | VEINES-Sym | 51.7 (49.8-53.7)                                 | 48.5 (46.4-50.6)               | 3.2 (0.4-6.1)     | 0.016    |

Data are mean values (95% CI). \*Mann Whitney U test

Independent of treatment allocation, the mean VEINES-QOL and VEINES-Sym scores were lower in patients who developed PTS compared to patients without PTS at both 6 and 24 months follow-up ( $p$ -

values <0.001) (Table 3). The mean differences were 6 points after 6 month, and increased to 8.6 and 9.8 points, respectively, after 24 months. The mean EQ-5D index was 0.09 points lower in PTS patients at 24 months follow-up ( $p<0.001$ ); however, there was no mean difference after 6 months. When looking at the PTS cases only at 24 months follow-up the three scores did not differ between the two treatment groups ( $p$ -value >0.8, data not shown).

Table 3 Generic and disease-specific quality of life and symptom severity according to PTS development

|                      |            | PTS (n=92)         | No PTS (n=97)      | Mean difference   | P-value* |
|----------------------|------------|--------------------|--------------------|-------------------|----------|
| 24 months            |            |                    |                    |                   |          |
| Generic QOL          | EQ-5D      | 0.77 (0.730-0.819) | 0.86 (0.823-0.903) | 0.09 (0.03-0.15)  | <0.001   |
| Disease-specific QOL | VEINES-QOL | 45.6 (43.4-47.9)   | 54.2 (52.8-55.6)   | 8.6 (5.9-11.2)    | <0.001   |
|                      | VEINES-Sym | 45.0 (42.7-47.2)   | 54.8 (53.5-56.0)   | 9.8 (7.3-12.3)    | <0.001   |
| 6 months             |            |                    |                    |                   |          |
| Generic QOL          | EQ-5D      | 0.80 (0.770-0.837) | 0.82 (0.788-0.869) | 0.02 (-0.08-0.28) | 0.062    |
| Disease-specific QOL | VEINES-QOL | 46.8 (44.6-49.0)   | 53.0 (51.3-54.7)   | 6.2 (3.4-9.09)    | <0.001   |
|                      | VEINES-Sym | 46.9 (44.6-49.1)   | 53.0 (51.4-54.6)   | 6.1 (3.4-8.9)     | <0.001   |

Data are mean values (95% CI). \* Mann Whitney U test

Looking at individual items concerning problems with mobility (EQ-5D) and limitations in daily activities at home, work or during leisure time (VEINES-QOL) there was no differences between the two treatment groups; however patients with PTS reported more problems and limitations than patients without PTS (data not shown).

The proportions of patients that reported clinically meaningful changes over time during the 6 to 24 months follow-up did not differ between the two treatment groups with regards to the two QOL scores, and the majority of patients reported no QOL change (table 4). In both groups 1 in 5 patients reported worsening of the Sym score, and 32% of control patients reported improved symptom severity compared to 16% treated with CDT ( $p=0.029$ ).

Table 4 Changes in generic and disease-specific quality of life and symptom severity during 6 to 24 months follow-up\*

|                      |                     | Additional catheter-directed thrombolysis (n=90) |                  | Standard treatment only (n=99) |                  | P-value** |
|----------------------|---------------------|--------------------------------------------------|------------------|--------------------------------|------------------|-----------|
|                      |                     | n                                                | % (95% CI)       | n                              | % (95% CI)       |           |
| Generic QOL          | EQ-5D improved      | 15                                               | 16.7 (10.0-24.4) | 24                             | 24.5 (16.6-33.4) | 0.233     |
|                      | EQ-5D worsened      | 22                                               | 24.4 (16.4-34.1) | 16                             | 16.3 (9.9-24.4)  |           |
| Disease-specific QOL | VEINES-QOL improved | 17                                               | 19.5 (11.8-28.0) | 27                             | 27.3 (19.2-36.7) | 0.462     |
|                      | VEINES-QOL worsened | 19                                               | 21.8 (13.6-30.4) | 19                             | 19.2 (12.3-27.8) |           |
|                      | VEINES-Sym improved | 14                                               | 15.9 (9.1-24.2)  | 32                             | 32.3 (23.7-42.0) | 0.029     |
|                      | VEINES-Sym worsened | 20                                               | 22.7 (14.5-31.7) | 21                             | 21.2 (14.0-30.1) |           |
|                      |                     | PTS (n=92)                                       |                  | No PTS (n=97)                  |                  | P-value*  |
|                      |                     | n                                                | % (95% CI)       | n                              | % (95% CI)       |           |
| Generic QOL          | EQ-5D improved      | 15                                               | 16.5 (9.8-24.9)  | 24                             | 24.7 (16.9-34.0) | 0.041     |
|                      | EQ-5D worsened      | 25                                               | 27.5 (18.8-36.9) | 13                             | 13.4 (7.7-21.3)  |           |
| Disease-specific QOL | VEINES-QOL improved | 21                                               | 23.3 (15.1-32.2) | 23                             | 24.0 (16.1-32.9) | 0.017     |
|                      | VEINES-QOL worsened | 26                                               | 28.9 (19.8-38.1) | 12                             | 12.5 (6.9-20.1)  |           |
|                      | VEINES-Sym improved | 20                                               | 22.0 (14.2-31.0) | 26                             | 27.1 (18.7-36.3) | 0.017     |
|                      | VEINES-Sym worsened | 28                                               | 30.8 (21.7-40.4) | 12                             | 13.5 (7.7-21.3)  |           |

\*A meaningful change was defined as  $\geq 4$  points for VEINES-QOL/Sym scores and  $\geq 0.08$  for the EQ-5D index; improvement or worsening below this was registered as no change. \*\*chi-square test

Correspondingly, when comparing proportions with meaningful changes in the three different scores during follow-up in patients with and without development of PTS independent of treatment allocation, the EQ-5D and VEINES-QOL scores worsened in nearly 30% of patients with PTS compared to 13% of patients who did not develop PTS ( $p=0.041$  and  $p=0.017$ , respectively)(table 4). Finally, 31% patients with PTS reported worsening of the Sym score compared to 14% of patients without PTS ( $p=0.017$ ).

## Discussion

We have previously shown that after a high proximal DVT additional CDT reduces the frequency of PTS [5]. Nevertheless, in the present report we found no differences in long-term QOL between patients

1  
2  
3 treated with additional CDT compared to patients who received standard treatment with anticoagulation  
4  
5 and compression stockings alone. However, patients who developed PTS after 24 months reported  
6  
7 poorer QOL with both EQ-5D and VEINES-QOL, and more symptoms on Sym score compared to patients  
8  
9 without PTS. This finding is in line with other reports, and the VEINES-QOL/Sym scores were in similar  
10  
11 ranges as previously reported in DVT populations [6,15-17].  
12  
13

14  
15 To our knowledge we are the first to investigate QOL after CDT in a well-designed study using validated  
16  
17 QOL instruments and PTS assessment. We have recently in a retrospective study of 71 patients  
18  
19 previously treated with CDT shown that VEINES-QOL/Sym scores were poorer in patients with  
20  
21 established PTS compared to no PTS (median) 6 years after the index DVT, and poorer in patients  
22  
23 compared to a control group without previous DVT [17]. Another retrospective study of corresponding  
24  
25 size found improved QOL and less post-thrombotic symptoms in patients treated with CDT compared to  
26  
27 similar patients treated with anticoagulation only; however, this study did not use a disease-specific QOL  
28  
29 instrument or a validated assessment of PTS [18]. This finding was not supported in our RCT, and long-  
30  
31 term QOL may not represent a significant secondary efficacy outcome after CDT.  
32  
33  
34  
35

36  
37 The baseline scores were obtained within 1-2 days following the verification of the acute DVT, and the  
38  
39 low EQ-5D scores are likely to reflect the patients' medical emergency situation at that time point. The  
40  
41 items of the VEINES instrument are concerned with "the last 4 weeks" and mean symptom duration  
42  
43 among study participants was only 6-7 days and, as indicated by the relatively better scores, the VEINES-  
44  
45 QOL/Sym baseline results are likely to reflect a longer period including time before symptom onset.  
46  
47 Finally, QOL is a more appropriate outcome for chronic conditions, and together with our lack of more  
48  
49 frequent study visits and longitudinal assessments, we did not include baseline scores in our analyses.  
50  
51  
52

53  
54 The finding that more control patients reported a meaningful improvement in the Sym score during  
55  
56 follow-up than patients treated with CDT, should be interpreted with caution as the 6 months Sym score  
57  
58  
59  
60

1  
2  
3 was higher in the CDT arm, though this difference did not reach a meaningful difference of at least 4  
4  
5 points.  
6  
7

8  
9 We regard our study population to be representative and the CDT procedure to be applicable in a clinical  
10  
11 setting [5]. However, due to the open label design, bias in patient reported outcomes like QOL cannot be  
12  
13 excluded, and it is uncertain in what direction such bias would impact the results. As our eligibility  
14  
15 criteria allowed for study participants to enroll with up to 21 days of symptoms, this meant that patients  
16  
17 with sub-acute DVT, that is more than 14 days of symptoms, may have entered the study and possibly  
18  
19 contributed to the overall high PTS frequency and lack of treatment group differences in the QOL scores  
20  
21 [19]. However, as the mean symptom duration was less than 7 days and only 15 patients (hereunder 8  
22  
23 controls) had more than 14 days of symptom, we find this unlikely. Finally, two ongoing RCTs; the  
24  
25 American ATTRACT study and the DUTCH CAVA trial, will provide additional data to the field of QOL after  
26  
27 CDT treatment ([www.clinicaltrials.gov](http://www.clinicaltrials.gov); NCT 00790335 and NCT 00970619).  
28  
29  
30  
31

32  
33 The Villalta scale has been validated and recommended for assessment of PTS [13,20], however, as no  
34  
35 gold standard exists and a relatively high frequency of PTS was found in both treatment arms, concerns  
36  
37 have been raised about the clinical benefit of CDT as shown in the CaVenT study [5,21]. The present  
38  
39 findings of poorer QOL in those who developed PTS, as obtained within an appropriately designed RCT,  
40  
41 underpin our perception that the 15% absolute reduction in PTS as assessed with the Villalta scale and  
42  
43 shown in CaVenT, does represent a clinically meaningful effect of additional CDT [5].  
44  
45  
46

47  
48 It has been recommended to include QOL as part of the long-term follow-up assessment of patients at  
49  
50 risk of PTS [6], and a recent review “recommend(s) that the Villalta score combined with a venous  
51  
52 disease-specific quality-of-life questionnaire be considered as the “gold standard” for the diagnosis and  
53  
54 classification of PTS” [22]. The VEINES questionnaire would be a candidate, but such a combination must  
55  
56 be validated in properly designed studies and take into account the apparent overlap between the  
57  
58  
59  
60

1  
2  
3 Villalta score and the VEINES-scores; all items in the Sym score are covered in the QOL score, 2/3 of Sym  
4  
5 items are covered in Villalta, and 1/4 of the QOL items are covered in Villalta. Finally, 5 of 11 items in  
6  
7 Villalta score, i.e., the symptom rating, are in fact patient reported outcomes (PRO), and combining with  
8  
9 another patient PRO instrument should seek to avoid assessing the same thing twice over.  
10  
11

12  
13 The generic instrument EQ-5D showed a clinically meaningful and statistically significant poorer QOL  
14  
15 measure in patients who developed PTS, indicating that this preference based questionnaire can be  
16  
17 included in studies on PTS and thereby allowing analyses on utilities and cost-effectiveness for decision  
18  
19 making [23]. However, the sample size was powered to detect a 15% reduction in PTS after additional  
20  
21 CDT, not improvement in QOL, which was among the secondary outcome measures. Accordingly, the  
22  
23 negative finding in terms of no difference in QOL between the treatment arms, may relate to the  
24  
25 sensitivity of the instruments, the prevalence of PTS, and the lack of power to detect a statistically  
26  
27 significant difference. Finally, the VEINES scores differed significantly between patients with PTS vs. no  
28  
29 PTS, and the magnitude of the mean difference was 6 points or higher. This has been reported to  
30  
31 represent meaningful differences, but a well-established definition or cut-off for a clinically meaningful  
32  
33 difference in VEINES scores is lacking, and also this limitation must be taken into account when  
34  
35 interpreting the results [10].  
36  
37  
38  
39  
40

41  
42 In conclusion, there was no difference in long-term QOL between patients with a high proximal DVT  
43  
44 treated with additional CDT compared to those treated with anticoagulation and compression therapy  
45  
46 alone. Patients who developed PTS reported poorer QOL and more symptoms than patients without PTS.  
47  
48 This is in line with previous reports, and supports the use of QOL as an outcome measure in clinical  
49  
50 research on patients who are at risk of PTS.  
51  
52  
53  
54  
55  
56  
57  
58  
59  
60



### Addendum: role of each author

T Enden: Design of study, acquisition of data, analysis and interpretation of data, drafting of manuscript, critical revision of manuscript, obtaining funding

H S Wik: Acquisition of data, interpretation of data, critical revision of manuscript

A K Kvam: Interpretation of data, and critical revision of manuscript

Y Haig: Acquisition of data and critical revision of manuscript

N E Kløw: Design of study, acquisition of data, critical revision of manuscript, obtaining funding

P M Sandset: Design of study, acquisition of data, critical revision of manuscript, obtaining funding

### Acknowledgements

We want to thank all study participants and study collaborators; without their contributions the CaVenT study would not have been feasible.

### Disclosure of Conflicts of Interests

The authors state that they have no conflict of interest.

### Funding

This work was funded by South-Eastern Norway Regional Health Authority, Research Council of Norway, University of Oslo and Oslo University Hospital, and the Unger-Vetlesen Medical Fund. The funding bodies played no role in the design and conduct of the study, the collection, management, analysis, interpretation and reporting of study data, or the writing or submission of the manuscript.

## References

- 1 Prandoni P, Lensing AW, Prins MH, Frulla M, Marchiori A, Bernardi E, et al. Below-knee elastic compression stockings to prevent the post-thrombotic syndrome: a randomized, controlled trial. *Ann Intern Med* 2004;141:249-56.
- 2 Brandjes DP, Buller HR, Heijboer H, Huisman MV, de RM, Jagt H, et al. Randomised trial of effect of compression stockings in patients with symptomatic proximal-vein thrombosis. *Lancet* 1997;349:759-62.
- 3 Kearon C, Akl EA, Comerota AJ, Prandoni P, Bounameaux H, oldhaber SZ, et al. Antithrombotic therapy for VTE disease: Antithrombotic Therapy and Prevention of Thrombosis, 9th ed: American College of Chest Physicians Evidence-Based Clinical Practice Guidelines. *Chest* 2012;141:e419S-e494S.
- 4 Enden T, Resch S, White C, Wik HS, Klow NE, Sandset PM. Cost-Effectiveness of Additional Catheter-Directed Thrombolysis for Deep Vein Thrombosis. *J Thromb Haemost* 2013.
- 5 Enden T, Haig Y, Klow NE, Slagsvold CE, Sandvik L, Ghanima W, et al. Long-term outcome after additional catheter-directed thrombolysis versus standard treatment for acute iliofemoral deep vein thrombosis (the CaVenT study): a randomised controlled trial. *Lancet* 2012;379:31-8.
- 6 Kahn SR, Shbaklo H, Lamping DL, Holcroft CA, Shrier I, Miron MJ, et al. Determinants of health-related quality of life during the 2 years following deep vein thrombosis. *J Thromb Haemost* 2008;6:1105-12.
- 7 Enden T, Sandvik L, Klow NE, Hafsaahl G, Holme PA, Holmen LO, et al. Catheter-directed Venous Thrombolysis in acute iliofemoral vein thrombosis-the CaVenT Study: Rationale and design of a multicenter, randomized, controlled, clinical trial (NCT00251771). *Am Heart J* 2007;154:808-14.
- 8 Enden T, Klow NE, Sandvik L, Slagsvold CE, Ghanima W, Hafsaahl G, et al. Catheter-directed thrombolysis vs. anticoagulant therapy alone in deep vein thrombosis: results of an open randomized, controlled trial reporting on short-term patency. *J Thromb Haemost* 2009;7:1268-75.
- 9 Enden T, Garratt AM, Klow NE, Sandset PM. Assessing burden of illness following acute deep vein thrombosis: data quality, reliability and validity of the Norwegian version of VEINES-QOL/Sym, a disease-specific questionnaire. *Scand J Caring Sci* 2009;369-74.
- 10 Lamping DL, Schroter S, Kurz X, Kahn SR, Abenhaim L. Evaluation of outcomes in chronic venous disorders of the leg: development of a scientifically rigorous, patient-reported measure of symptoms and quality of life. *J Vasc Surg* 2003;37:410-9.
- 11 Walters SJ, Brazier JE. Comparison of the minimally important difference for two health state utility measures: EQ-5D and SF-6D. *Qual Life Res* 2005;14:1523-32.
- 12 Pickard AS, Neary MP, Cella D. Estimation of minimally important differences in EQ-5D utility and VAS scores in cancer. *Health Qual Life Outcomes* 2007;5:70.

- 13 Kahn SR, Partsch H, Vedantham S, Prandoni P, Kearon C. Definition of post-thrombotic syndrome of the leg for use in clinical investigations: a recommendation for standardization. *J Thromb Haemost* 2009;7:879-83.
- 14 Wittrup-Jensen KU, Lauridsen J, Gudex C, Pedersen KM. Generation of a Danish TTO value set for EQ-5D health states. *Scand J Public Health* 2009;37:459-66.
- 15 Kahn SR, Ducruet T, Lamping DL, Arsenault L, Miron MJ, Roussin A, et al. Prospective evaluation of health-related quality of life in patients with deep venous thrombosis. *Arch Intern Med* 2005;165:1173-8.
- 16 Broholm R, Sillesen H, Damsgaard MT, Jorgensen M, Just S, Jensen LP, et al. Postthrombotic syndrome and quality of life in patients with iliofemoral venous thrombosis treated with catheter-directed thrombolysis. *J Vasc Surg* 2011;54:18S-25S.
- 17 Ghanima W, Kleven IW, Enden T, Rosales A, Wik HS, Pederstad L, et al. Recurrent venous thrombosis, post-thrombotic syndrome and quality of life after catheter-directed thrombolysis in severe proximal deep vein thrombosis. *J Thromb Haemost* 2011;9:1261-3.
- 18 Comerota AJ. Quality-of-life improvement using thrombolytic therapy for iliofemoral deep venous thrombosis. *Rev Cardiovasc Med* 2002;3 Suppl 2:S61-S67.
- 19 Vedantham S, Grassi CJ, Ferral H, Patel NH, Thorpe PE, Antonacci VP, et al. Reporting standards for endovascular treatment of lower extremity deep vein thrombosis. *J Vasc Interv Radiol* 2009;20:S391-S408.
- 20 Kahn SR. Measurement properties of the Villalta scale to define and classify the severity of the post-thrombotic syndrome. *J Thromb Haemost* 2009;7:884-8.
- 21 Hofmann LV, Kuo WT. Catheter-directed thrombolysis for acute DVT. *Lancet* 2012;379:3-4.
- 22 Soosainathan A, Moore HM, Gohel MS, Davies AH. Scoring systems for the post-thrombotic syndrome. *J Vasc Surg* 2012;57:254-61.
- 23 Drummond MF, Sculpher M, et al. *Methods for the Economic Evaluation of Health Care Programmes*. 3rd ed. 2006.

CONSORT Statement 2001 - Checklist   
 Items to include when reporting a randomized trial

| <i>PAPER SECTION<br/>And topic</i>         | Item | Descriptor                                                                                                                                                                                                                                                                                                                                                  | Reported on<br>Page #      |
|--------------------------------------------|------|-------------------------------------------------------------------------------------------------------------------------------------------------------------------------------------------------------------------------------------------------------------------------------------------------------------------------------------------------------------|----------------------------|
| <i>TITLE &amp; ABSTRACT</i>                | 1    | <u>How participants were allocated to interventions</u> (e.g., "random allocation", "randomized", or "randomly assigned").                                                                                                                                                                                                                                  | 2                          |
| <i>INTRODUCTION<br/>Background</i>         | 2    | <u>Scientific background and explanation of rationale.</u>                                                                                                                                                                                                                                                                                                  | 3                          |
| <i>METHODS<br/>Participants</i>            | 3    | <u>Eligibility criteria for participants</u> and the <u>settings and locations where the data were collected.</u>                                                                                                                                                                                                                                           | 3                          |
| Interventions                              | 4    | <u>Precise details of the interventions intended for each group and how and when they were actually administered.</u>                                                                                                                                                                                                                                       | 4                          |
| Objectives                                 | 5    | <u>Specific objectives and hypotheses.</u>                                                                                                                                                                                                                                                                                                                  | 3                          |
| Outcomes                                   | 6    | <u>Clearly defined primary and secondary outcome measures</u> and, when applicable, any <u>methods used to enhance the quality of measurements</u> (e.g., multiple observations, training of assessors).                                                                                                                                                    | 5                          |
| Sample size                                | 7    | <u>How sample size was determined</u> and, when applicable, <u>explanation of any interim analyses and stopping rules.</u>                                                                                                                                                                                                                                  | 5                          |
| Randomization --<br>Sequence generation    | 8    | <u>Method used to generate the random allocation sequence, including details of any restrictions</u> (e.g., blocking, stratification)                                                                                                                                                                                                                       | 3,4                        |
| Randomization --<br>Allocation concealment | 9    | <u>Method used to implement the random allocation sequence</u> (e.g., numbered containers or central telephone), clarifying whether the sequence was concealed until interventions were assigned.                                                                                                                                                           | 3                          |
| Randomization --<br>Implementation         | 10   | <u>Who generated the allocation sequence, who enrolled participants, and who assigned participants to their groups.</u>                                                                                                                                                                                                                                     | 4                          |
| Blinding (masking)                         | 11   | <u>Whether or not participants, those administering the interventions, and those assessing the outcomes were blinded to group assignment.</u> If done, <u>how the success of blinding was evaluated.</u>                                                                                                                                                    | 3                          |
| Statistical methods                        | 12   | <u>Statistical methods used to compare groups for primary outcome(s); Methods for additional analyses</u> , such as subgroup analyses and adjusted analyses.                                                                                                                                                                                                | 5                          |
| <i>RESULTS<br/>Participant flow</i>        | 13   | <u>Flow of participants through each stage</u> (a diagram is strongly recommended). Specifically, for each group report the numbers of participants randomly assigned, receiving intended treatment, completing the study protocol, and analyzed for the primary outcome. <u>Describe protocol deviations from study as planned, together with reasons.</u> | 6                          |
| Recruitment                                | 14   | <u>Dates defining the periods of recruitment and follow-up.</u>                                                                                                                                                                                                                                                                                             | 5                          |
| Baseline data                              | 15   | <u>Baseline demographic and clinical characteristics of each group.</u>                                                                                                                                                                                                                                                                                     | 6 + table 1                |
| Numbers analyzed                           | 16   | <u>Number of participants (denominator) in each group included in each analysis and whether the analysis was by "intention-to-treat".</u> State the results in absolute numbers when feasible (e.g., 10/20, not 50%).                                                                                                                                       | 5 + table 2                |
| Outcomes and estimation                    | 17   | <u>For each primary and secondary outcome, a summary of results for each group, and the estimated effect size and its precision</u> (e.g., 95% confidence interval).                                                                                                                                                                                        | 8 + tables<br>2,3,4        |
| Ancillary analyses                         | 18   | <u>Address multiplicity by reporting any other analyses performed</u> , including subgroup analyses and adjusted analyses, indicating those pre-specified and those exploratory.                                                                                                                                                                            | 3                          |
| Adverse events                             | 19   | <u>All important adverse events or side effects in each intervention group.</u>                                                                                                                                                                                                                                                                             | Previous<br>publication(s) |
| <i>DISCUSSION<br/>Interpretation</i>       | 20   | <u>Interpretation of the results</u> , taking into account study hypotheses, sources of potential bias or imprecision and the dangers associated with multiplicity of analyses and outcomes.                                                                                                                                                                | 11-13                      |
| Generalizability                           | 21   | <u>Generalizability (external validity) of the trial findings.</u>                                                                                                                                                                                                                                                                                          | 12                         |
| Overall evidence                           | 22   | <u>General interpretation of the results in the context of current evidence.</u>                                                                                                                                                                                                                                                                            | 11-13                      |



Protocol

Catheter-directed Venous Thrombolysis in Acute Iliofemoral  
Vein Thrombosis - an open Randomized, Controlled, Clinical  
Trial

The CaVenT Study Group



Working Protocol - Amendment 04 – August 2007

1  
2  
3  
4  
5  
6  
7  
8  
9  
10  
11  
12  
13  
14  
15  
16  
17  
18  
19  
20  
21  
22  
23  
24  
25  
26  
27  
28  
29  
30  
31  
32  
33  
34  
35  
36  
37  
38  
39  
40  
41  
42  
43  
44  
45  
46  
47  
48  
49  
50  
51  
52  
53  
54  
55  
56  
57  
58  
59  
60

For peer review only

**CONTENTS**

|    |                                                    |    |
|----|----------------------------------------------------|----|
|    | Investigators                                      | 5  |
|    | CaVenT study group                                 | 7  |
| 1  | Synopsis                                           | 9  |
| 2  | Background                                         | 11 |
| 3  | Objectives                                         | 17 |
| 4  | Hypothesis                                         | 17 |
| 5  | Patient population                                 | 18 |
| 6  | Methods                                            | 19 |
| 7  | Definitions                                        | 24 |
| 8  | Statistics                                         | 27 |
| 9  | Ethical considerations                             | 28 |
| 10 | Milestones                                         | 28 |
| 11 | Trial organization                                 | 29 |
| 12 | Publication                                        | 30 |
|    | References                                         | 31 |
|    | Appendix 1 (Patient Information/Approval formular) | 35 |
|    | Appendix 2 (VEINES-QoL and EQ-D5 formulars)        | 39 |

1  
2  
3  
4  
5  
6  
7  
8  
9  
10  
11  
12  
13  
14  
15  
16  
17  
18  
19  
20  
21  
22  
23  
24  
25  
26  
27  
28  
29  
30  
31  
32  
33  
34  
35  
36  
37  
38  
39  
40  
41  
42  
43  
44  
45  
46  
47  
48  
49  
50  
51  
52  
53  
54  
55  
56  
57  
58  
59  
60

For peer review only



**Investigators:****Principal Investigator:**

Professor Per Morten Sandset, MD, PhD  
Department of Hematology, Ullevål University Hospital (UUS)  
NO-0407 Oslo, Norway  
Tel.: +47 22119247 Fax.: +47 22119040  
E-mail: [p.m.sandset@medisin.uio.no](mailto:p.m.sandset@medisin.uio.no)

**Co-investigator:**

Professor Nils-Einar Kløw, MD, PhD,  
Department of Cardiovascular Radiology, UUS  
Tel.: +47 22119415 Fax.: +47 22119415  
E-mail: [n.e.klow@medisin.uio.no](mailto:n.e.klow@medisin.uio.no)

**Research Fellow:**

Tone Enden, MD  
Departments of Hematology and Radiology, UUS  
Tel.: +47 23016097 Mobile: 91716584 Fax.: +47 22119040  
E-mail: [tone.enden@medisin.uio.no](mailto:tone.enden@medisin.uio.no)

**Statistician:**

Professor Leiv Sandvik, PhD, Statistician  
Research Forum, UUS  
Tel.: +47 23015057 Fax.: +47 22118479  
E-mail: [leiv.sandvik@uus.no](mailto:leiv.sandvik@uus.no)

**Angiologist:**

Consultant Carl-Erik Slagsvold, MD, PhD,  
Department of Vascular Diagnosis and Research, Oslo Vascular Center  
Aker University Hospital (AUS)  
Tel.: +47 22894000  
E-mail: [carlerikslagsvold@yahoo.no](mailto:carlerikslagsvold@yahoo.no)

**Hematologists:**

Consultant Pål Andre Holme, MD, PhD  
Department of Hematology, Rikshospitalet-Radiumhospitalet (RR) HF  
Tel.: +47 23070000  
E-mail: [Holme@rikshospitalet.no](mailto:Holme@rikshospitalet.no)

Consultant Waleed Ghanima, MD  
Department of Internal Medicine, Central Hospital in Østfold  
Tel.: +47 69860000  
E-mail: [Waleed.Ghanima@so-hf.no](mailto:Waleed.Ghanima@so-hf.no)

Consultant Anne Mette Njaastad, MD  
Department of Hematology, AUS  
Tel.: +47 22894865  
E-mail: [AnneMette.Njaastad@akersykehus.no](mailto:AnneMette.Njaastad@akersykehus.no)

**Radiologists:**

Consultant Geir Hafsahl, MD  
The Interventional Centre, RR  
Tel.: +47 23070000  
E-mail: [geir.hafsahl@rikshospitalet.no](mailto:geir.hafsahl@rikshospitalet.no)

Consultant Lars Olaf Holmen, MD  
Department of Radiology, Østfold Hospital Trust Fredrikstad  
Tel.: +47 69860000  
E-mail: [Lars.Olaf.Holmen@so-hf.no](mailto:Lars.Olaf.Holmen@so-hf.no)

1  
2  
3 Consultant Gunnar Sandbæk, MD, PhD  
4 Department of Radiology, Aker University Hospital  
5 Tel.: +47 22 89 40 00  
6 E-mail: [gunnar.sandbaek@medisin.uio.no](mailto:gunnar.sandbaek@medisin.uio.no)  
7

**Research Nurse:**

8 Torill Moan  
9 Department of Hematology, UUS  
10 Tel.: +47 22119242  
11 E-mail: [torillnyborg.moan@uus.no](mailto:torillnyborg.moan@uus.no)  
12

**Technician:**

13 Marie-Christine Mowinckel  
14 Department of Hematology/ Hematological Res Lab, UUS  
15 Tel.: +47 23015783  
16 E-mail: [Marie-Christine.Mowinckel@uus.no](mailto:Marie-Christine.Mowinckel@uus.no)  
17  
18  
19  
20  
21  
22  
23  
24  
25  
26  
27  
28  
29  
30  
31  
32  
33  
34  
35  
36  
37  
38  
39  
40  
41  
42  
43  
44  
45  
46  
47  
48  
49  
50  
51  
52  
53  
54  
55  
56  
57  
58  
59  
60

## The Cavent Study Group

### Interventional Centres

| Participating Centre                        | Collaborator                | E-mail                                                                                   |
|---------------------------------------------|-----------------------------|------------------------------------------------------------------------------------------|
| <b>Aker University Hospital (AUS)</b>       |                             |                                                                                          |
| ▪ Hematologist                              | Anne Mette Njåstad, MD      | <a href="mailto:AnneMette.Njaastad@akersykehus.no">AnneMette.Njaastad@akersykehus.no</a> |
| ▪ Radiologist                               | Gunnar Sandbæk, MD, PhD     | <a href="mailto:gunnar.sandbaek@medisin.uio.no">gunnar.sandbaek@medisin.uio.no</a>       |
| <b>Østold Hospital Trust Fredrikstad</b>    |                             |                                                                                          |
| ▪ Hematologist                              | Waleed Ghanima, MD          | <a href="mailto:Waleed.Ghanima@so-hf.no">Waleed.Ghanima@so-hf.no</a>                     |
| ▪ Radiologist                               | Lars Olav Holmen, MD        | <a href="mailto:Lars.Olaf.Holmen@so-hf.no">Lars.Olaf.Holmen@so-hf.no</a>                 |
| <b>Rikshospitalet-Radiumhospitalet (RR)</b> |                             |                                                                                          |
| ▪ Hematologist                              | Pål Andre Holmen, MD, PhD   | <a href="mailto:Holme@rikshospitalet.no">Holme@rikshospitalet.no</a>                     |
| ▪ Radiologist                               | Geir Hafsahl, MD            | <a href="mailto:geir.hafsahl@rikshospitalet.no">geir.hafsahl@rikshospitalet.no</a>       |
| <b>Ullevaal University Hospital (UUS)</b>   |                             |                                                                                          |
| ▪ Hematologist                              | Per Morten Sandset, MD, PhD | <a href="mailto:p.m.sandset@medisin.uio.no">p.m.sandset@medisin.uio.no</a>               |
| ▪ Radiologist                               | Nils-Einar Kløw, MD, PhD    | <a href="mailto:n.e.klow@medisin.uio.no">n.e.klow@medisin.uio.no</a>                     |

# The Cavent Study Group

## Participating Centres

### Helse Sør RHF:

| Participating Centre           | Collaborator            | E-mail                                                                                         |
|--------------------------------|-------------------------|------------------------------------------------------------------------------------------------|
| <b>Blefjell sykehus HF</b>     |                         |                                                                                                |
| ▪ Rjukan                       | Oddvar Øygarden, MD     | <a href="mailto:Oddvar.Oygarden@blefjellsykehus.no">Oddvar.Oygarden@blefjellsykehus.no</a>     |
| ▪ Notodden                     | Thomas Baisa, MD        | <a href="mailto:tbaisa@online.no">tbaisa@online.no</a>                                         |
| ▪ Kongsberg                    | Lydia Klevstul, MD      | <a href="mailto:lidia.klevstul@blefjellsykehus.no">lidia.klevstul@blefjellsykehus.no</a>       |
| <b>Ringerike sykehus HF</b>    | Vigdis Stenberg, MD     | <a href="mailto:vigdis.stenberg@Ringerike-sykehus.no">vigdis.stenberg@Ringerike-sykehus.no</a> |
| <b>Sykehuset Buskerud HF</b>   | Jacob Dalgaard, MD, PhD | <a href="mailto:jakob.dalgaard@sb-hf.no">jakob.dalgaard@sb-hf.no</a>                           |
| <b>Sykehuset i Vestfold HF</b> |                         |                                                                                                |
| ▪ Tønsberg                     | Per Arne Standal, MD    | <a href="mailto:per.standal@siv.no">per.standal@siv.no</a>                                     |
| ▪ Larvik                       | Sverre Nyhus, MD        | <a href="mailto:sverre.nyhus@siv.no">sverre.nyhus@siv.no</a>                                   |
| <b>Sykehuset Telemark HF</b>   | Erwin Müller, MD        | <a href="mailto:erwin.muller@sthf.no">erwin.muller@sthf.no</a>                                 |
| <b>Sørlandet sykehus HF</b>    |                         |                                                                                                |
| ▪ Kristiansand                 | Jürgen Rolke, MD        | <a href="mailto:jurgen.rolke@sshf.no">jurgen.rolke@sshf.no</a>                                 |
| ▪ Arendal                      | Yngve Benestad, MD      | <a href="mailto:yngve.benestad@sshf.no">yngve.benestad@sshf.no</a>                             |
| ▪ Flekkefjord                  | Morten Rønningen, MD    | <a href="mailto:mortenro@gmail.com">mortenro@gmail.com</a>                                     |

### Helse Øst RHF:

| Participating Centre                   | Collaborator           | E-mail                                                                                                   |
|----------------------------------------|------------------------|----------------------------------------------------------------------------------------------------------|
| <b>Sykehuset Asker og Bærum HF</b>     | Arnljot Tveit, MD      | <a href="mailto:arnljot.tveit@broadpark.no">arnljot.tveit@broadpark.no</a>                               |
| <b>Akershus Universitetssykehus HF</b> | Willy Aasebø, MD       | <a href="mailto:willy.aasebo@ahus.no">willy.aasebo@ahus.no</a>                                           |
| <b>Lovisenberg Diakonale sykehus</b>   | Hege Pihlstrøm, MD     | <a href="mailto:hege.pihlstrom@lds.no">hege.pihlstrom@lds.no</a>                                         |
| <b>Diakonhjemmets sykehus</b>          | Torbjørn Holm, MD, PhD | <a href="mailto:torbjorn.holm@diakonsyk.no">torbjorn.holm@diakonsyk.no</a>                               |
| <b>Sykehuset Innlandet HF</b>          |                        |                                                                                                          |
| ▪ Gjøvik                               | Per Vandvik, MD, PhD   | <a href="mailto:per.vandvik@start.no">per.vandvik@start.no</a>                                           |
| ▪ Lillehammer                          | Eystein Brandt, MD     | <a href="mailto:eystein.brandt@sykehuset-innlandet.no">eystein.brandt@sykehuset-innlandet.no</a>         |
| ▪ Hamar                                | Øvind Bukten, MD       | <a href="mailto:buktenoyvin@hotmail.no">buktenoyvin@hotmail.no</a>                                       |
| ▪ Elverum                              | Marianne Kalbakken, MD | <a href="mailto:marianne.kalbakken@sykehuset-innlandet.no">marianne.kalbakken@sykehuset-innlandet.no</a> |

# 1 SYNOPSIS

Deep vein thrombosis (DVT) is a severe disease which may cause severe disability and which is sometimes fatal. Conventional treatment with low molecular weight heparin (LMWH) and oral antiocoagulants is associated with some degree of long-term sequelae, i.e., post-thrombotic syndrome (PTS), in more than 60-80% of the patients. Systemic thrombolytic therapy reduces the risk of PTS, but is associated with an unacceptably high risk of bleeding complications, many being disabling or fatal. Catheter-directed thrombolytic (CDT) therapy is a novel treatment modality which has been introduced in many hospitals worldwide. Low dose fibrinolytic agents are delivered continuously and directly into the thrombus through a catheter until thrombus has dissolved. Although many, mostly small series, have suggested a beneficial effect of this costly treatment in terms of increased patency of the veins and improved short term functional outcome, there are no randomized clinical trials documenting its short and long-term efficacy and safety.

The present study is a randomized, open-label, multi-center clinical trial among hospitals in the Eastern and Southern Norway Health Authorities (Helse Øst and Sør). Patients with acute iliofemoral vein thrombosis will be randomized to either conventional treatment or CDT in addition to conventional treatment. Main outcome parameters are patency rates at 6 months and prevalence of PTS at 24 months. A number of secondary outcomes include bleeding complications, recurrent thrombosis, quality of life (QoL), markers of importance for successful lysis and recurrent thrombosis, and whether PTS is related to patency at the end of treatment.

Our main short-term hypothesis is that CDT of first-time acute DVT will increase patency of the affected iliofemoral vein segments after 6 months from <50% on conventional therapy to >80% after CDT. Our main long-term hypothesis is that CDT will improve long-term functional outcome, i.e., risk of PTS, assessed after 2 years, from >25% on conventional treatment to <10% after CDT. The estimated sample size is at least 100 evaluable patients in each group using a statistical significance ( $\alpha$ ) = 5% and a statistical power ( $1-\beta$ ) = 80%.

1  
2  
3  
4  
5  
6  
7  
8  
9  
10  
11  
12  
13  
14  
15  
16  
17  
18  
19  
20  
21  
22  
23  
24  
25  
26  
27  
28  
29  
30  
31  
32  
33  
34  
35  
36  
37  
38  
39  
40  
41  
42  
43  
44  
45  
46  
47  
48  
49  
50  
51  
52  
53  
54  
55  
56  
57  
58  
59  
60

For peer review only

## 2 BACKGROUND

Deep vein thrombosis (DVT) of the lower extremities is a common disease, which is associated with significant morbidity. The incidence of DVT is estimated as 1 event per 1,000 per year, which ranks it as one of the more common cardiovascular disorders<sup>1</sup>. Furthermore, DVT is associated with several important short- and long-term outcomes<sup>2</sup>. Short-term there are symptoms of pain and swelling due to inflammation and obstruction. In a small minority of cases, the condition leads to phlegmasia cerulea dolens in which extensive venous obstruction leads to ischemia or infarction of the extremity. Lastly, DVT can also lead to pulmonary embolism (PE), which can be fatal. Long-term sequelae of DVT include recurrent venous thromboembolism (VTE), post-thrombotic syndrome (PTS), and chronic thromboembolic pulmonary hypertension.

Anticoagulation therapy is the basic treatment of DVT<sup>3</sup>, which purpose is to inhibit the thrombotic process and the inflammatory response so that the thrombus can be cleared by endogenous fibrinolysis. Anticoagulation therapy thereby alleviates acute symptoms, prevents PE, and recurrent events. In most cases, anticoagulation is achieved acutely with unfractionated heparin (UFH) or low molecular weight heparin (LMWH) therapy, followed by long term anticoagulation with oral vitamin K antagonists (eg warfarin).

Anticoagulation therapy is highly efficacious for the prevention of recurrent VTE, PE, and death<sup>3;4</sup>, but the ability to prevent PTS as an outcome is less clear<sup>5</sup>. PTS is thought to be a result of residual venous stenosis and damage to the venous valves which together cause venous hypertension. Venous hypertension leads to chronic edema and fibrin deposition in the interstitial tissues, which in turn bring about poor oxygen exchange. Insufficient oxygenation induces skin changes, pain and, in severe cases, chronic ulceration.

Several studies have addressed the epidemiology of PTS<sup>5;6</sup>, i.e., the incidence of PTS over time, its risk factors, the relationship between vein patency and development of PTS, and the usefulness of compression stockings to prevent PTS following a first episode of acute DVT treated with anticoagulation alone<sup>5;7-10</sup>. The incidence of moderate or severe PTS varied across these studies, but in general increased over time. Moderate to severe PTS developed in 2% to 11% of patients with DVT provided that compression stockings were worn at some early point after the acute DVT. Elastic compression stockings may reduce the risk of PTS by approximately 50%<sup>11;12</sup>. Risk factors for severe PTS identified by some, but not all of these studies, were recurrent ipsilateral DVT, extent of initial thrombus, and obesity. Although the role of return of vein patency has not been established, it may still be an appropriate surrogate for long-term outcomes.

Thrombolytic agents, such as streptokinase (SK), urokinase (UK), and recombinant tissue plasminogen activator (rt-PA) are, theoretically, ideal adjuvants to standard anticoagulation therapy because they potentially dissolve thrombi, promote early vein recanalization, and thereby, minimize vein stenosis and valve dysfunction<sup>13;14</sup>. Therefore, treatment strategies incorporating these agents with anticoagulation may be more effective than those using anticoagulation alone for the prevention of PTS. In addition, in the minority of cases with phlegmasia cerulea dolens, thrombolytic therapies may prove limb saving. However, despite the theoretical advantages and a history of more than 30 years of use, thrombolytic therapy has not been widely embraced for DVT treatment due to poor

*Table 1* Summary results for the trials comparing streptokinase (SK) to intravenous unfractionated heparin (UFH); Values in parentheses are percent of cases.

| Study                               | SK            |             | UFH           |             | Odds Ratio (95% CI) |                    |
|-------------------------------------|---------------|-------------|---------------|-------------|---------------------|--------------------|
|                                     | Events/N      | (%)         | Events/N      | (%)         |                     |                    |
| <b>Efficacy = significant lysis</b> |               |             |               |             |                     |                    |
| Robertson 1 <sup>15</sup>           | 5/8           | (63)        | 1/8           | (13)        | 9.4                 | (0.9, 98.1)        |
| Kakkar <sup>16</sup>                | 7/10          | (70)        | 2/20          | (20)        | 8.2                 | (1.1, 58.7)        |
| Robertson 2 <sup>17</sup>           | 5/9           | (56)        | 1/7           | (14)        | 6.2                 | (0.6, 62.1)        |
| Tsapogas <sup>18</sup>              | 10/19         | (53)        | 1/15          | (7)         | 12.6                | (1.7, 96.5)        |
| Porter <sup>19</sup>                | 13/24         | (54)        | 8/26          | (31)        | 2.6                 | (0.8, 8.2)         |
| Elliot <sup>20</sup>                | 17/26         | (65)        | 0/25          | (0)         | 188.4               | (3.4, 10494)       |
| Arnesen <sup>21</sup>               | 15/21         | (71)        | 5/21          | (24)        | 7.6                 | (1.9, 29.3)        |
| <b>Total</b>                        | <b>72/117</b> | <b>(62)</b> | <b>18/112</b> | <b>(16)</b> | <b>8.5</b>          | <b>(4.4, 16.3)</b> |
| <b>Major Hemorrhage</b>             |               |             |               |             |                     |                    |
| Robertson                           | 2/8           | (25)        | 0/8           | (0)         | 11.9                | (0.2, 843)         |
| Kakkar                              | 3/30          | (39)        | 2/10          | (20)        | 1.6                 | (0.2, 11.8)        |
| Tsapogas                            | 4/19          | (21)        | 0/15          | (0)         | 17.0                | (0.3, 1022)        |
| Porter                              | 4/24          | (17)        | 1/26          | (4)         | 4.2                 | (0.5, 34)          |
| Elliot                              | 2/26          | (8)         | 0/25          | (0)         | 9.4                 | (0.1, 607)         |
| Schulman <sup>22</sup>              | 3/17          | (18)        | 1/19          | (5)         | 3.3                 | (0.4, 29.4)        |
| Arnesen                             | 2/21          | (10)        | 2/21          | (10)        | 1.0                 | (0.1, 7.1)         |
| <b>Total</b>                        | <b>20/115</b> | <b>(16)</b> | <b>6/124</b>  | <b>(5)</b>  | <b>3.9</b>          | <b>(1.5, 10.3)</b> |



Table 2 Summary results for the trials comparing urokinase (UK) to intravenous unfractionated heparin (UFH); Values in parentheses are percent of cases.

| Study                               | UK<br>Events/N (%) | UFH<br>Events/N (%) | Odds Ratio (95% CI)   |
|-------------------------------------|--------------------|---------------------|-----------------------|
| <b>Efficacy = significant lysis</b> |                    |                     |                       |
| Goldhaber <sup>23</sup>             | 1/8 (13)           | 1/9 (11)            | 1.1 (0.1, 2.9)        |
| Kiil <sup>24</sup>                  | 1/11 (9)           | 1/9 (11)            | 0.8 (0, 14.9)         |
| <b>Total</b>                        | <b>2/19 (11)</b>   | <b>2/18 (11)</b>    | <b>1.0 (0.1, 7.2)</b> |
| <b>Major Hemorrhage</b>             |                    |                     |                       |
| Goldhaber                           | 0/8 (0)            | 1/9 (11)            | 0.2 (0, 16.3)         |
| Kiil                                | 0/11 (0)           | 3/9 (33)            | 0.8 (0, 2.8)          |
| <b>Total</b>                        | <b>0/19 (0)</b>    | <b>4/18 (22)</b>    |                       |

Table 3 Summary results for the trials comparing recombinant tissue plasminogen activator (rt-PA) to intravenous unfractionated heparin (UFH); Values in parentheses are percent of cases.

| Study                               | rt-PA<br>Events/N (%) | UFH<br>Events/N (%) | Odds Ratio (95% CI)   |
|-------------------------------------|-----------------------|---------------------|-----------------------|
| <b>Efficacy = significant lysis</b> |                       |                     |                       |
| Goldhaber <sup>23</sup>             | 15/53 (28)            | 0/12 (0)            | 10.1 (0.8, 999)       |
| Turpie 2 <sup>25</sup>              | 6/29 (21)             | 2/30 (7)            | 3.7 (0.6, 29)         |
| Turpie 1 <sup>25</sup>              | 7/12 (58)             | 0/12 (0)            | 34.1 (2.0, 999)       |
| <b>Total</b>                        | <b>28/94 (30)</b>     | <b>2/54 (4)</b>     | <b>11.7 (2.6, 53)</b> |
| <b>Major Hemorrhage</b>             |                       |                     |                       |
| Goldhaber                           | 1/53 (2)              | 0/12 (0)            | 0.7 (0.01, 999)       |
| Turpie 2                            | 0/29 (0)              | 0/30 (0)            | 0.3 (0, 22000)        |
| Turpie 1                            | 1/12 (0)              | 0/12 (0)            | 1.0 (0.02, 43)        |
| Verhaeghe <sup>26</sup>             | 0/11 (0)              | 3/9 (33)            | 7.3 (0, 2.8)          |
| <b>Total</b>                        | <b>0/105 (2)</b>      | <b>3/63 (48)</b>    | <b>0.4</b>            |

documentation of its efficacy and high short-term risk of bleeding<sup>27</sup>. Overall only a few hundred patients have been evaluated in randomized clinical trials. The effects of SK treatment versus heparin are summarized in Table I, the effects of urokinase versus heparin in Table II, and that of rt-PA versus heparin in Table III. The overall clinical effects are shown in Table IV.

Table 4 Summary results of all trials of thrombolytic therapy for acute DVT (after<sup>13</sup>).

| Treatment                                                           | Success rate<br>(% with significant lysis) | Major hemorrhage<br>(%) |
|---------------------------------------------------------------------|--------------------------------------------|-------------------------|
| Unfractionated heparin                                              | 12                                         | 6                       |
| SK                                                                  | 62                                         | 16                      |
| SK high dose                                                        | Uninterpretable                            | Uninterpretable         |
| SK low dose                                                         | 27                                         | 15                      |
| UK                                                                  | 11                                         | 0                       |
| rt-PA                                                               | 30                                         | 8                       |
| rt-PA high dose                                                     | 6                                          | 29                      |
| rt-PA local administration                                          | 27                                         | 10                      |
| Catheter directed (UK and rt-PA)<br>(no randomized clinical trials) | 83                                         | 11                      |

Several published studies using ultrasound imaging have demonstrated considerable endogenous ability to lyse thrombi after conventional anticoagulation therapy<sup>2</sup>. One year after acute DVT, somewhere between 30% and 73% of patients will normalize their ultrasound findings. Earlier in the disease course, patency rates are lower, demonstrating that over time there is continued recanalization of the vein. The studies do not describe PTS incidence and whether or not development of the condition correlates with recanalization status. Without this information, it is difficult to answer the important question of whether or not early recanalization protects against development of PTS.

*Catheter-directed thrombolytic therapy (CDT)* is a relatively new technique for treatment of DVT<sup>13;28</sup> and its efficacy has recently been reviewed<sup>29</sup>. It involves application of the thrombolytic agent directly into the thrombus using a catheter with multiple side holes. The catheter is passed into the clot under radiographic guidance. The venous puncture may be central or peripheral to the thrombosed vein. For thrombolysis of the pelvic and the femoral veins, the access was in the early studies of the internal jugular, or the contralateral or ipsilateral femoral veins. Subsequent investigators have used the ipsilateral popliteal vein with success and this appears to be the site of choice. The thrombolytic agent is administered over 1-4 days until dissolution of the clot is apparent. Both UK, alteplase (Actilyse®), reteplase (Rapilysin®) and tenecteplase (Metalyse®) has been used, but UK is no longer available in the market, and only alteplase may be given as a continuous iv infusion, preferably at 0.001-0.02 mg/kg/hour<sup>30;31</sup>. Heparin therapy should be given concomitantly intravenously probably at subtherapeutic doses<sup>29;30;32;33</sup>, corresponding to a 1.2-1.7 times prolongation of aPTT.

1  
2  
3 The decision to discontinue the drug is based on daily venographic examinations through the  
4 indwelling catheter. Depending on the findings the catheter may be pulled out, the infusion continued, or  
5 the catheter repositioned. To obtain flow in the veins balloon inflation may be performed at the follow-  
6 up. Thrombolytic agents are given until there is no more evidence of thrombosis or until there is little  
7 improvement in venographic appearance. After 72-96 hours thrombolysis is discontinued. Adjuvant  
8 therapies include angioplasty, angioplasty with stents, thrombectomy, and surgically created arterio-  
9 venous fistulas.  
10

11  
12  
13  
14  
15 So far, there are no randomized clinical trials with long-term follow-up on the efficacy of CDT  
16 therapy, but at least 15 case series have been reported<sup>29,34-37</sup>. Combining the studies, 263 patients  
17 received this type of therapy for thrombosis of the iliofemoral veins or inferior vena cava. 221 (84%)  
18 patients were considered to have successful short-term outcomes based on venographic appearance and  
19 13 (4.9%) patients had bleeding severe enough to warrant transfusion. Long term outcomes were not  
20 reported, and the authors did not describe the proportion of patients requiring adjuvant therapy.  
21

22  
23  
24  
25 A National DVT Registry was established in North-America to analyze results in a large number  
26 of patients treated with CDT<sup>38</sup>. This registry included 473 patients with documented lower extremity  
27 DVT treated with CDT, but follow-up data included only 287 patients who received 312 treatments.  
28 Thrombi subjected to lysis included either ilio-femoral vein thrombosis in 71% of cases and femoro-  
29 popliteal vein thrombosis in 25% of cases. The mean age of patients was 47.5 years and the mean  
30 duration of infusion was 53 h. All patients had six months of therapy with oral anticoagulants following  
31 CDT and many had heparin as well. Complete lysis was obtained in 31% of patients, 50-99% lysis in  
32 52% and <50% lysis in 17%. Successful lysis was not related to location of the thrombus. The overall  
33 primary patency rate was 80% at 12 months, with better patency for ilio-femoral segments than the  
34 femoro-popliteal segments. Major bleeding complications occurred in 11% of patients; 39% of these at  
35 the venous insertion site, 13% were retroperitoneal hematoma. Minor bleeding events occurred in 16%  
36 of patients, again most often at the venous entry site. There was one fatal intracranial hemorrhage, one  
37 subdural hematoma, and 6 pulmonary emboli of which one was fatal. Thus, the overall mortality rate  
38 from lysis was 0.4%. There was no data on PTS.  
39

40  
41  
42  
43  
44  
45  
46  
47  
48 If the PTS differs between standard therapy and thrombolytic therapy then the quality of life may  
49 differ between patients also. Comerota assessed health-related quality of life in patients after CDT  
50 therapy compared to a group of patients treated with standard anticoagulation therapy<sup>39</sup>. The delayed  
51 functional outcome and wellbeing scores were significantly better in the thrombolytic therapy group.  
52 Although this study had some methodological shortcomings<sup>13</sup>, the findings are still suggestive that  
53 thrombolytic therapy may offer improved quality of life in patients who achieve successful  
54 thrombolysis.  
55  
56  
57  
58  
59  
60

1  
2  
3 Compared to historical data of anticoagulation and intravenous thrombolysis, CDT probably has  
4 higher recanalization rates. The studies so far, including one RCT with 6 months follow-up and 35  
5 patients<sup>40</sup>, have been promising, but unfortunately no high-quality randomized studies with long-term  
6 follow-up have been performed. Experimental data indicate that valves of the femoral veins may be  
7 preserved<sup>41;42</sup>. It is therefore possible that PTS may be reduced. However, long term studies have not  
8 been performed. In the absence of well-designed randomized clinical studies both for early findings, the  
9 implications of early patency for long-term clinical results, the complications, and the costs related to  
10 treatment, CDT therapy for DVT should at present be considered experimental treatment. Still, some  
11 Norwegian hospitals including Aker and Ullevål University Hospitals, Rikshospitalet, and the Østfold  
12 Hospital Trust Fredrikstad, do provide this high-intensive treatment to selected patients. A case-series  
13 with careful follow-up at Aker University Hospital has recently been published<sup>31</sup>.

14  
15  
16 In the present study, we aim to investigate the role of CDT therapy for treatment of acute DVT  
17 as compared with established treatment with low molecular weight heparin. The study will be an open-  
18 label, randomized study of patients with first-time acute DVT of the affected limb, and our major  
19 outcome parameter will be the frequency of PTS as related to early venographic patency. The results of  
20 this study have the potential to properly define the role of this costly treatment in the future.  
21  
22  
23  
24  
25  
26  
27  
28  
29  
30  
31  
32  
33  
34  
35  
36  
37  
38  
39  
40  
41  
42  
43  
44  
45  
46  
47  
48  
49  
50  
51  
52  
53  
54  
55  
56  
57  
58  
59  
60

### 3 OBJECTIVES

#### 3.1 PRIMARY OBJECTIVES

To investigate whether catheter-directed thrombolytic therapy for first-time acute DVT of the iliofemoral veins may:

- 3.1.1 increase patency rate at 6 months.
- 3.1.2 reduce the risk of PTS at 2 years.

#### 3.2 SECONDARY OBJECTIVES

- 3.2.1 To investigate frequency of clinically relevant bleeding related to the procedure.
- 3.2.2 To investigate effects on quality of life (QoL).
- 3.2.3 To investigate cost-effectiveness of treatment.
- 3.2.4 To investigate the procedural success of CDT.
- 3.2.5 To identify markers of importance for successful thrombolysis.
- 3.2.6 To investigate patency at 2 years.
- 3.2.7 To investigate PTS at 6 and 60 months.
- 3.2.8 To investigate whether presence or absence of PTS at any time point is related to patency at end of treatment.
- 3.2.9 To investigate prevalence of vein anomalies (and need for angioplasty or stents).
- 3.2.10 To investigate prevalence of underlying thrombophilia.
- 3.2.11 To investigate frequency of recurrent VTE during follow-up.
- 3.2.12 To identify markers of importance for recurrent thrombosis.

### 4 HYPOTHESES

Our main short-term hypothesis is that CDT of first-time acute DVT will increase patency of the affected iliofemoral vein segments after 6 months from <50% on conventional therapy to >80% after CDT. Our main long-term hypothesis is that CDT will improve long-term functional outcome, i.e., risk of PTS, assessed after 2 years, from >25% on conventional treatment to <10% after CDT.

## 5 PATIENT POPULATION

### 5.1 INCLUSION CRITERIA

- 5.1.1 Age 18-75 years.
- 5.1.2 Onset of symptoms <21 days.
- 5.1.3 Objectively verified DVT (ultrasonography, venography, computed tomography, or magnetic resonance imaging) localized in the upper half of the thigh, the common iliac vein or the combined iliofemoral segment.
- 5.1.4 Informed consent (Appendix 1).

### 5.2 EXCLUSION CRITERIA

- 5.2.1 Anticoagulant therapy prior to trial entry for >7 days.
- 5.2.2 Contraindications to thrombolytic therapy, including bleeding diathesis.
- 5.2.3 Indications for thrombolytic therapy, e.g., phlegmacia coerulea dolens or isolated vena cava thrombosis.
- 5.2.4 Severe anemia (hemoglobin <8 g/dL).
- 5.2.5 Thrombocytopenia (platelets <80·10<sup>9</sup>/L).
- 5.2.6 Severe renal failure – creatinine clearance <30 ml/min. Creatinine clearance will be calculated according to the following formula:

$$\text{Creatinine clearance (ml/min)} = \frac{b \times (140 - \text{age (yrs)}) \times \text{body weight (kg)}}{\text{serum creatinine (\mu mol/L)}}$$

$$b=1.23 \text{ (females); } 1.04 \text{ (males)}$$

- 5.2.7 Severe hypertension, i.e. persistent systolic blood pressure >160 mm Hg or diastolic blood pressure >100 mm Hg.
- 5.2.8 Pregnancy and thrombosis ≤7 days post-partum (may be included after 7 days post-partum).
- 5.2.9 Less than 14 days post-surgery or post-trauma (may be included after 14 days).
- 5.2.10 History of subarachnoidal or intracerebral bleeding.
- 5.2.11 Disease with life expectancy <24 months.
- 5.2.12 Drug abuse or mental disease that may interfere with treatment and follow-up.
- 5.2.13 Former ipsilateral proximal DVT.
- 5.2.14 Malignant disease requiring chemotherapy.
- 5.2.15 Any thrombolytic therapy within 7 days prior to trial inclusion.

## 6 METHODS

### 6.1 DESIGN

Multi-center, open-label, randomized clinical study on the effect and safety of CDT therapy as compared with conventional therapy for the treatment of acute, first-time ilio-femoral DVT. The study will be a collaborative study of hospitals belonging to the Eastern and Southern Norway Health Authorities (Helse Øst and Sør).

### 6.2 PATIENT RECRUITMENT

Eligible patients (section 5) will be invited to participate in the study. Informed consent (Appendix 1) in accordance with the revised Helsinki Declaration must be obtained from the patient before randomization.

### 6.3 RANDOMIZATION

Patients will be randomized by sealed numbered envelopes using block randomization. Each envelope will contain information on treatment allocation. A new patient will be allocated the lowest numbered envelope. Treatment will be open-label, but stratified for extension of DVT, i.e., only femoral or iliofemoral DVT.

### 6.4 TREATMENT

#### 6.4.1 Acute treatment

Patients will be randomized to one of the following treatment groups:

|          |                                                                                                                                                     |
|----------|-----------------------------------------------------------------------------------------------------------------------------------------------------|
| Group I  | Catheter-directed thrombolytic therapy with rt-PA in addition to conventional treatment with low molecular weight heparin (for details – see 6.4.2) |
| Group II | Conventional treatment with low molecular weight heparin (see 6.4.3)                                                                                |

Drugs will be ordered from the hospital's pharmacy according to local routines.

- Group I will be given rt-PA (Actilyse®) combined with unfractionated heparin and followed by low molecular weight heparin (LMWH) and warfarin.
- Group II, the conventional treatment arm, will be given LMWH, either sc dalteparin (Fragmin®), 200 IU/kg od, or enoxaparin (Klexane®), 1.5 mg/kg od, according to local routines, and warfarin.

## 6.4.2 Group I - Catheter-Directed Thrombolytic (CDT) therapy – procedures

- **Anticoagulant and fibrinolytic therapy**

- Discontinue oral anticoagulants - INR should be <1.5 before the procedure.
- In case of prior sc LMWH therapy treatment should be discontinued at least 8 h before the procedure, and in case of prior UFH treatment APTT (Cephotest®) should be adjusted to 40-60 sec during the procedure (see below).
- An iv bolus dose of UFH, 5000 U, should be given followed by continuous iv UFH<sup>1</sup> infusion at 15 U/kg/h. Adjust dose to keep APTT (Cephotest®) at 40-60 sec, first adjustment 6-12 h after start of treatment.
- During the thrombolytic treatment keep APTT (Cephotest®) at 40-60 sec.
- At the completion of thrombolytic treatment:
  - ✓ discontinue UFH
  - ✓ give sc LMWH after 1 h, (either dalteparin, Fragmin®, 200 U/kg bid, or enoxaparin, Klexane®, 1,5 mg/kg bid).
  - ✓ Oral warfarin (Marevan®) will be initiated according to local routines.
  - ✓ LMWH will be discontinued when INR has been in therapeutic range (2.0-3.0) for at least 24 hours, but should not be given for less than total 4-5 days.

- **Interventional procedures.** In an interventional radiology unit, an introducer will be inserted into an appropriate vein, preferentially the popliteal vein, guided by ultrasound to prevent puncture of the artery or laceration of the vein wall and to secure only a single puncture. If possible, the wire and catheter should be introduced above the proximal part of the thrombus (use fitting-sized perfusion catheters, e.g., 10, 20, 30, or 50 cm). A venography should then be performed to disclose the topography of the thrombus. CDT may be discontinued if introduction of the catheter through the occluded segment is not successful. Catheters should be properly fixed to the skin.

The perfusion catheter (and the perfusion wire) should cover the central to peripheral part of the thrombus. Rt-PA (Actilyse®), 20 mg diluted in 500 ml 0.9% NaCl, will be infused at 0.01 mg/kg/h. Maximal dose infused will be 20 mg/24 h. The rt-PA dosage may be split into two catheters using lower concentration, keeping flow the same.

---

<sup>1</sup> A suitable working solution should be made to contain UFH 40 U/ml in 0.9% NaCl, e.g., mix 20000 U of UFH in 500 ml 0.9% NaCl or 40000 U in 1000 ml 0.9% NaCl. The infusion rate (ml/h) then reflects total units of UFH per 24 hrs in thousands, e.g., 25 ml/h corresponds to 25000 U/24 h, 30 ml/h 30000 U/24 h, and so on.



1  
2  
3 After insertion of catheter, venography, and start of iv UFH and iv rt-PA infusion, treatment will  
4 continue in medical wards. Blood pressure and pulse and the puncture site are assessed 4 times a  
5 day. Hemostasis is also monitored by daily analysis of hemoglobin, fibrinogen, D-dimer, INR, and  
6 platelet counts. APTT is monitored twice daily for adjustment of heparin dose. The patient will be  
7 encouraged to use the muscle pump of the leg while in bed. No food and drink restrictions.  
8  
9

10  
11 Effect of treatment will be assessed by venography at least every 24 hrs, and catheters  
12 repositioned accordingly. Treatment should normally not continue for >96 h. At the end of  
13 treatment, the catheters will be removed immediately and hemostasis obtained by manual  
14 compression of the puncture site. Pressure will be continued for 2 hrs with a roll while the patient is  
15 immobilized.  
16  
17  
18  
19

- 20  
21 • **Stents.** Balloon dilatation and placement of venous stents will be performed at the discretion of the  
22 operator to establish flow and to obtain <50% residual stenosis.  
23  
24
- 25 • **Concomitant medication during procedure.** During the interventional procedure concomitant use  
26 of other antithrombotic agents should be avoided because of increased risk of bleeding. This  
27 includes antiplatelet agents (e.g., acetylsalicylic acid, thienopyridines, GPIIb/IIIa inhibitors, non  
28 steroidal anti-inflammatory agents, or other) or anticoagulants (e.g., low molecular weight heparin,  
29 pentasaccharide, warfarin, or other). Concomitant use of ACE-inhibitors appears to increase the risk  
30 of anafylactoid reactions.  
31  
32  
33  
34  
35  
36  
37

#### 38 **6.4.3 Group II – conventional treatment with LMWH**

39 Patients allocated the conventional treatment arm will be given sc LMWH, either dalteparin  
40 (Fragmin®), 200 U/kg od, or enoxaparin (Klexane®), 1.5 mg/kg od, according to local hospital  
41 routines, and simultaneous warfarin (Marevan®) according to local routines. LMWH will be  
42 discontinued when INR has been in therapeutic range (2.0-3.0) for at least 24 hours, but should not be  
43 given for less than total 4-5 days.  
44  
45  
46  
47  
48

#### 49 **6.4.4 Subacute and chronic phase after DVT**

50 Patients will be treated with warfarin for at least 6 months with target INR 2.0-3.0. All patients will be  
51 advised to use knee-high compression stockings, grade II, for 6 months.  
52  
53  
54  
55  
56  
57  
58  
59  
60

## 6.5 VISITS AND PROCEDURES DURING FOLLOW-UP

End-point assessment will be performed by a vascular surgeon with no previous contact or knowledge of patients' medical history or treatment allocation. At each visit the patients will explicitly be told not to reveal treatment allocation.

### 6.5.1 Visit 1 (trial entry – at hospital admission/)

6.5.1.1 Case history and general clinical examination.

6.5.1.2 Compression ultrasonography or venography, alternatively CT or MRI angiography diagnosing acute iliofemoral DVT.

6.5.1.3 Laboratory screening (hemoglobin, platelets, leukocytes, creatinine, ASAT, ALAT, GT, bilirubin, INR, APTT, D-Dimer, cholesterol, and CRP).

6.5.1.4 Thrombophilia screening (collection of blood samples).

6.5.1.5 Assessment of baseline QoL before treatment using VEINES-QoL and EQ-D5 (Appendix 2).

6.5.1.6 Assessment of baseline clinical score using Villalta<sup>5,43</sup> score and the C classification of CEAP, see Definitions.

### 6.5.2 Visit 2 (hospital stay)

6.5.2.1 Daily assessment of hemoglobin, platelets, fibrinogen, APTT, INR, and D-Dimer, and bilateral leg circumference.

6.5.2.2 Daily venography will be performed in patients allocated CDT.

6.5.2.4 Bleeding complications.

### 6.5.3 Visit 3 – 6 m ± 2 weeks

6.5.3.1 Clinical history – recurrent thrombosis – malignancy.

6.5.3.2 Clinical PTS scores according to Villalta and CEAP. Bilateral leg circumference.

6.5.3.3 Assessment of functional venous obstruction by air-plethysmography.

6.5.3.4 Ultrasonographic assessment of postthrombotic changes, patency, and reflux<sup>44-47</sup>.

6.5.3.5 Quality of Life (QoL) assessment (Appendix 2).

6.5.3.6 D-dimer testing, INR, thrombophilia screening (if previously inconclusive).

### 6.5.4 VISIT 4 – 12 m ± 4 weeks

Telephone interview – recurrent thrombosis – malignancy.

**6.5.5 VISIT 5 – 24 m ± 4 weeks**

6.5.5.1 Clinical history – recurrent thrombosis – malignancy.

6.5.5.2 Clinical PTS scores according to Villalta and CEAP. Bilateral leg circumference..

6.5.5.3 Assessment of functional venous obstruction by air-plethysmography.

6.5.5.4 Ultrasonographic assessment of postthrombotic changes, patency, and reflux

6.5.5.5 Quality of Life (QoL) assessment (Appendix 2).

6.5.5.6 D-dimer, INR, thrombophilia screening (if previously inconclusive).

**6.5.6 VISIT 6 – 36 m ± 4 weeks**

Telephone interview – recurrent thrombosis – malignancy.

**6.5.7 VISIT 7 – 48 m ± 4 weeks**

Telephone interview – PTS screening – recurrent thrombosis – malignancy.

**6.5.8 VISIT 8 – 60 m ± 8 weeks**

6.5.8.1 Clinical history – recurrent thrombosis – malignancy.

6.5.8.2 Clinical PTS scores according to Villalta and CEAP. Bilateral leg circumference.

6.5.8.3 Ultrasonographic assessment of postthrombotic changes, patency, and reflux.

6.5.8.4 Assessment of functional venous obstruction by air-plethysmography.

6.5.8.5 Quality of Life (QoL) assessment (Appendix 2).

## 7 DEFINITIONS

### 7.1 Post-Thrombotic Syndrome (PTS)

#### 7.1.1 The Villalta Score<sup>5;43</sup>

PTS will be evaluated using the Villalta score, which scores PTS based on five symptoms and six objective signs (each item graded from 0 to 3):

Five symptoms: heaviness, pain (spontaneous or during deambulation), cramps, pruritus, and paresthesia.

Six signs: pretibial edema, induration of the skin, hyperpigmentation, new venous ectasia, redness, pain during calf compression

A total score of 5-14 indicates mild to moderate PTS, whereas a score of 15 or more indicates severe PTS. A lower limb venous ulcer indicates severe PTS regardless of the sum of the remaining signs and symptoms. The Villalta Score is quantitative and useful for longitudinal assessment of PTS.

#### 7.1.2 The Clinical-Etiology-Anatomic-Pathophysiologic (CEAP) classification<sup>48;49</sup>

This is a classification of Clinical (dermatological) signs, Etiology, Anatomic distribution and Pathophysiologic dysfunction:

|                                       |                                                                  |                                                                              |
|---------------------------------------|------------------------------------------------------------------|------------------------------------------------------------------------------|
| <b>Clinical signs</b>                 | <b>Class 0</b>                                                   | <b>No visible or palpable signs of venous disease</b>                        |
|                                       | <b>Class 1</b>                                                   | <b>Teleangiectases or reticular veins</b>                                    |
|                                       | <b>Class 2</b>                                                   | <b>Varicose veins</b>                                                        |
|                                       | <b>Class 3</b>                                                   | <b>Edema</b>                                                                 |
|                                       | <b>Class 4</b>                                                   | <b>a. pigmentation, eczema<br/>b. lipodermatosclerosis, atrophie blanche</b> |
|                                       | <b>Class 5</b>                                                   | <b>Healed ulceration (and skin changes as defined above)</b>                 |
|                                       | <b>Class 6</b>                                                   | <b>Active ulceration (and skin changes as defined above)</b>                 |
| <b>Etiological classification</b>     | <b>Congenital, primary, secondary</b>                            |                                                                              |
| <b>Anatomic distribution</b>          | <b>Superficial, deep, or perforator, alone or in combination</b> |                                                                              |
| <b>Pathophysiological dysfunction</b> | <b>Reflux or obstruction, alone or in combination</b>            |                                                                              |

## 7.2 Non-invasive assessment of veins

### 7.2.1 Deep vein thrombosis<sup>50</sup>

#### 7.2.1.1 Acute deep vein thrombosis

The principal criterion is inability to completely compress the vein lumen when examining the vein in the transverse plane. Other possible findings are distention of the vein, absence of flow, loss of phasic flow, and visualization of clot.

#### 7.2.1.2 Chronic thrombosis and postthrombotic changes

Absence of complete incompressibility indicates residual thrombosis. Other postthrombotic features are wall-thickening and intraluminal hyperechoic structure.

### 7.2.2 Flow

Using Doppler-ultrasound, flow will be graded as spontaneous flow, forced flow (on peripheral compression), and no flow (obstruction)<sup>38</sup>. Flow will also be examined in supine position.

### 7.2.3 Reflux

Using Doppler-ultrasound and a distal inflation cuff with the patient in standing position, reflux is defined as reversal of the velocity curve after distal pneumatic decompression lasting longer than 0.5 second<sup>51-53</sup>.

### 7.2.4 Assessment of functional venous obstruction

Venous obstruction will be assessed by using air plethysmography<sup>54;55</sup>. The patients will lie supine with the calf elevated (by a cushion) to the level of the heart. An occlusion cuff will be placed proximally on the thigh, and a recording cuff with a pressure of 6 mmHg will be placed on the calf. The proximal cuff will be inflated to 50 mmHg for 1 min. A venous outflow curve will be recorded when this cuff is deflated, and maximum outflow can then be calculated (delta mm/sec). Low outflow rates indicate presence of functional venous obstruction. The procedure will be performed on both legs.

### 7.2.5 Assessment of venous patency

Assessment of venous patency will include compressibility, flow and functional venous obstruction.

### 7.3 Evaluation of thrombolysis

Based on venography before and after CDT, thrombolysis will be graded by a scoring system<sup>38</sup>. Score=0 indicates an open vein, score=1 a partly occluded vein, and score=2 a completely occluded vein.

Each of the following 7 venous segments will be given a grade (0-2): IVC, the common iliac vein, the external iliac vein, the common femoral vein, the proximal and distal superficial femoral veins, and the popliteal vein. A total thrombus score before and after lysis will be calculated by adding the 7 scores. The difference between the pre- and postlysis thrombus scores divided by the prelysis score gives the grade of thrombolysis. Grade I=<50%; grade II=50-90%, and grade III=complete thrombolysis

### 7.4 Bleeding Complications

7.4.1 **Major bleeding** – any bleeding associated with a reduction in hemoglobin by  $\geq 2$  g/100 mL or bleeding requiring transfusion of  $\geq 2$  U pack red blood cells or whole blood or bleeding in a critical organ, intracranial, retroperitoneal or pericardial or bleeding contributing to death.

7.4.2 **Clinically relevant non-major bleeding** – overt bleeding not meeting criteria for major bleeding but satisfying a priori criteria defined by the safety monitoring committee including for example skin hematomas  $>100$  cm<sup>2</sup>, epistaxis lasting  $>5$  min, being repetitive ( $\geq 2/24$  h) or requiring intervention (packing, electrocoagulation), macroscopic hematuria – either spontaneous or lasting  $>24$  h after instrumentation (catheter or surgery) of the urogenital tract, or any other bleeding type that is considered to have clinical consequences for the patient.

7.4.3 **Trivial bleeding** - all other overt bleeding episodes not meeting the criteria for clinically relevant bleeding.

### 7.5 Thrombophilia screening

Includes screening for antithrombin, protein C- and protein S deficiencies, factor V Leiden mutation, the prothrombin gene 20210GA allele variation and the methylene tetrahydrofolate reductase (MTHFR) mutation, homocystein, lupus anticoagulants and anticardiolipin antibodies.

## 8 STATISTICS

### 8.1 Sample size

Numerous studies indicate that conventional treatment, i.e., UFH or LMWH followed by oral anticoagulants is associated with PTS in more than 60-80% of the cases, whereas systemic thrombolytic therapy is associated with PTS in approximately 30% of the patients<sup>5;21;56</sup>. More recent studies employing systematic use of elastic compression stockings suggest PTS in approximately 25% of the patients.<sup>11</sup> In the present study, we will assume that the rate of PTS after 2 years will be at least 25% in those allocated conventional therapy as compared with less than 10% in those given CDT. For patency after 6 m we assume that the rate is less than 50% in those allocated conventional treatment as compared with at least 80% in those given CDT. With a significance level of  $\alpha \leq 5\%$  and a statistical power  $(1-\beta)$  of  $\geq 80\%$ , we will need to randomize approximately 100 patients in each group.

Also as presented in our hypotheses, we assume that venous patency after 6 months occurs in less than 50% in those allocated conventional treatment as compared to at least 80% in those given adjunctive CDT. It may then be shown that with a significance level of 5% and a statistical power  $\geq 80\%$ , 76 patients must be included to test this short-term hypothesis. We plan to analyse patency rates after 6 months based on the first 100 patients with 6 months patency data. This analysis will be repeated when 200 patients have 6 months patency data.

### 8.2 Statistical methods

All statistical analysis will be performed according to the intention-to-treat principle. If ineligible patients are mistakenly included, they may be excluded (ref Ferguson et al BMJ 2002), apart from this, no other post-randomization exclusions will be made. The effect of treatment will be determined using 2x2 tables with assessment of the difference between patent vessels and prevalence of PTS, relative risks, and odds ratios with 95% confidence limits. The prevalence of clinically relevant bleeding, PTS, vein anomalies, thrombophilia, recurrent DVT will be determined using point estimates with 95% confidence intervals. A stratification analysis will be carried out using the Mantel-Haenzel method. Differences in baseline characteristics may be adjusted for using a multivariate logistic model. This may be done if there are substantial differences between the two groups, and if the variable(s) is probably or certainly associated with the outcome measure, e.g., age and previous VTE. Missing data on end-point variables will be scored as previous score or last/worst score carried forward.

## 9 ETHICAL CONSIDERATIONS

This study will recruit patients with proximal DVT. Even though the efficacy and safety of CDT for the treatment of acute proximal DVT remains to be established, some hospitals in many countries now offer CDT to selected patients with severe DVT, especially when the DVT extends into the caval vein. In the present study, non-trial CDT to selected patients with severe DVT will be left to the discretion of the responsible physician.

The study will be performed in accordance with the revised Helsinki Declaration and Good Clinical Practice (GCP). The study will only start after approval with the Regional Ethical Committee and the Norwegian Medical Agency. All patients will be given study specific identification codes and all data will be stored in a secured database on a secured server for research at the Ullevål University Hospital. This server as well as data management will be controlled by the Patient Protection Ombud at the Ullevål University Hospital. A non-linked database will provide information on the patients' contact information to allow follow-up. A biobank will be established at Ullevål University Hospital after approval.

## 10 MILESTONES

|             |                                                                             |
|-------------|-----------------------------------------------------------------------------|
| Q1-2006     | First patient randomized                                                    |
| Q4-2007     | Last patient randomized                                                     |
| Q2-2008     | Six months follow-up of all patients for primary efficacy parameter patency |
| Q2-3-2008   | Reporting of study design and primary efficacy parameter patency            |
| Q4-2009     | Two-years follow-up of all patients for primary efficacy parameter PTS      |
| Q4-Q1-09-10 | Reporting of primary efficacy parameter PTS                                 |
| Q4-2012     | Five years follow-up of last patient for patency and PTS.                   |



# 11 TRIAL ORGANIZATION

## 11.1 GENERAL ORGANIZATION

The study is an investigator initiated study which will be run independently of the pharmaceutical industry. The study is financially supported by a grant from Eastern Norway Health Authority (doctoral fellow; Helse Øst grant no 2005-090).

The study will be a major collaborative effort among hospitals of the Eastern and Southern Norway Health Authorities (Helse Øst and Sør). All hospitals will be invited to participate in the study. Patients allocated to conventional treatment will be treated at the local hospital, whereas patients allocated CDT will be treated at Ullevål and Aker University Hospitals, the National Hospital and the Central Hospital in Østfold.

## 11.2 COMMITTEES

### 11.2.1 Executive committee

- Per Morten Sandset (chair) – UUS – Hematologist
- Nils-Einar Kløw – UUS – Radiologist
- Leiv Sandvik – UUS – Statistician
- Tone Enden – UUS – Research fellow – Resident in Radiology
- Carl-Erik Slagsvold – AUS – Angiologist
- Anne Mette Njåstad – AUS – Hematologist
- Gunnar Sandbaek – AUS – Radiologist
- Pål Andre Holme – RR – Hematologist
- Geir Hafsaahl – RR – Radiologist
- Waleed Ghanima – Østfold Hospital Trust Fredrikstad – Hematologist
- Lars Olav Holmen – Østfold Hospital Trust Fredrikstad – Radiologist

### 11.2.2 Steering committee

- Executive committee (chair Per Morten Sandset)
- One member from each collaborating hospital

### 11.2.3 Safety and monitoring committee

- Professor emeritus Ulrich Abildgaard
- Professor Frank Brosstad, Rikshospitalet-Radiumhospitalet, Oslo

## 12 PUBLICATION

Results of this study will be published in international medical journals, but will also be communicated to the general population whenever appropriate. The results may potentially have great interest for the scientific community, for health-providers in decision making, and for the general population. Publication will follow the Vancouver convention. Tone Enden will be the first author of these publications.

For peer review only

## REFERENCES

1. White RH. The epidemiology of venous thromboembolism. *Circulation* 2003;107:14-18.
2. Kearon C. Natural history of venous thromboembolism. *Circulation* 2003;107:122-130.
3. Kearon C. Initial treatment of venous thromboembolism. *Thromb.Haemost.* 1999;82:887-891.
4. Kearon C. Duration of anticoagulation for venous thromboembolism. *J.Thromb.Thrombolysis.* 2001;12:59-65.
5. Kahn SR, Ginsberg JS. Relationship between deep venous thrombosis and the postthrombotic syndrome. *Arch.Intern.Med.* 2004;164:17-26.
6. Prandoni P, Lensing AW, Cogo A et al. The long-term clinical course of acute deep venous thrombosis. *Ann.Intern.Med.* 1996;125:1-7.
7. Lindner DJ, Edwards JM, Phinney ES, Taylor LM, Jr., Porter JM. Long-term hemodynamic and clinical sequelae of lower extremity deep vein thrombosis. *J.Vasc.Surg.* 1986;4:436-442.
8. Brandjes DP, Buller HR, Heijboer H et al. Randomised trial of effect of compression stockings in patients with symptomatic proximal-vein thrombosis. *Lancet* 1997;349:759-762.
9. Franzeck UK, Schalch I, Bollinger A. On the relationship between changes in the deep veins evaluated by duplex sonography and the postthrombotic syndrome 12 years after deep vein thrombosis. *Thromb.Haemost.* 1997;77:1109-1112.
10. Biguzzi E, Mozzi E, Alatri A et al. The post-thrombotic syndrome in young women: retrospective evaluation of prognostic factors. *Thromb.Haemost.* 1998;80:575-577.
11. Prandoni P, Lensing AWA, Prins MH et al. Below-Knee Elastic Compression Stockings To Prevent the Post-Thrombotic Syndrome: A Randomized, Controlled Trial. *Ann Intern Med* 2004;141:249-256.
12. Ginsberg JS. Routine Stocking Therapy after Deep Venous Thrombosis: A Clinical Dilemma. *Ann Intern Med* 2004;141:314-315.
13. Wells PS, Forster AJ. Thrombolysis in deep vein thrombosis: is there still an indication? *Thromb.Haemost.* 2001;86:499-508.
14. Marder VJ, Stewart D. Towards safer thrombolytic therapy. *Semin.Hematol.* 2002;39:206-216.
15. Robertson BR, Nilsson IM, Nylander G. Value of streptokinase and heparin in treatment of acute deep venous thrombosis. A coded investigation. *Acta Chir Scand.* 1968;134:203-208.
16. Kakkar VV, Flanc C, Howe CT, O'Shea M, Flute PT. Treatment of deep vein thrombosis. A trial of heparin, streptokinase, and arvin. *Br.Med.J.* 1969;1:806-810.
17. Robertson BR, Nilsson IM, Nylander G. Thrombolytic effect of streptokinase as evaluated by phlebography of deep venous thrombi of the leg. *Acta Chir Scand.* 1970;136:173-180.
18. Tsapogas MJ, Peabody RA, Wu KT et al. Controlled study of thrombolytic therapy in deep vein thrombosis. *Surgery* 1973;74:973-984.
19. Porter JM, Seaman AJ, Common HH et al. Comparison of heparin and streptokinase in the treatment of venous thrombosis. *Am.Surg.* 1975;41:511-519.
20. Elliot MS, Immelman EJ, Jeffery P et al. A comparative randomized trial of heparin versus streptokinase in the treatment of acute proximal venous thrombosis: an interim report of a prospective trial. *Br.J.Surg.* 1979;66:838-843.

- 1
  - 2
  - 3
  - 4
  - 5
  - 6
  - 7
  - 8
  - 9
  - 10
  - 11
  - 12
  - 13
  - 14
  - 15
  - 16
  - 17
  - 18
  - 19
  - 20
  - 21
  - 22
  - 23
  - 24
  - 25
  - 26
  - 27
  - 28
  - 29
  - 30
  - 31
  - 32
  - 33
  - 34
  - 35
  - 36
  - 37
  - 38
  - 39
  - 40
  - 41
  - 42
  - 43
  - 44
  - 45
  - 46
  - 47
  - 48
  - 49
  - 50
  - 51
  - 52
  - 53
  - 54
  - 55
  - 56
  - 57
  - 58
  - 59
  - 60
21. Arnesen H, Hoiseth A, Ly B. Streptokinase of heparin in the treatment of deep vein thrombosis. Follow-up results of a prospective study. *Acta Med.Scand.* 1982;211:65-68.
22. Schulman S, Granqvist S, Juhlin-Dannfelt A, Lockner D. Long-term sequelae of calf vein thrombosis treated with heparin or low-dose streptokinase. *Acta Med.Scand.* 1986;219:349-357.
23. Goldhaber SZ, Hirsch DR, MacDougall RC, Polak JF, Creager MA. Bolus recombinant urokinase versus heparin in deep venous thrombosis: a randomized controlled trial. *Am.Heart J.* 1996;132:314-318.
24. Kiil J, Carvalho A, Sakso P, Nielsen HO. Urokinase or heparin in the management of patients with deep vein thrombosis? *Acta Chir Scand.* 1981;147:529-532.
25. Turpie AG, Levine MN, Hirsh J et al. Tissue plasminogen activator (rt-PA) vs heparin in deep vein thrombosis. Results of a randomized trial. *Chest* 1990;97:172S-175S.
26. Verhaeghe R, Besse P, Bounameaux H, Marbet GA. Multicenter pilot study of the efficacy and safety of systemic rt-PA administration in the treatment of deep vein thrombosis of the lower extremities and/or pelvis. *Thromb.Res.* 1989;55:5-11.
27. O'Meara JJ, III, McNutt RA, Evans AT, Moore SW, Downs SM. A decision analysis of streptokinase plus heparin as compared with heparin alone for deep-vein thrombosis. *N.Engl.J.Med.* 1994;330:1864-1869.
28. Semba CP, Dake MD. Iliofemoral deep venous thrombosis: aggressive therapy with catheter-directed thrombolysis. *Radiology* 1994;191:487-494.
29. Sharafuddin MJ, Sun S, Hoballah JJ et al. Endovascular management of venous thrombotic and occlusive diseases of the lower extremities. *J.Vasc.Interv.Radiol.* 2003;14:405-423.
30. Semba CP, Bakal CW, Calis KA et al. Alteplase as an Alternative to Urokinase. *J Vasc Interv Radiol* 2000;11:279-287.
31. Ly B, Njaastad AM, Sandbaek G et al. [Catheter-directed thrombolysis of iliofemoral venous thrombosis]. *Tidsskr.Nor Laegeforen.* 2004;124:478-480.
32. Semba CP, Sugimoto K, Razavi MK. Alteplase and tenecteplase: applications in the peripheral circulation. *Tech.Vasc Interv Radiol* 2001;4:99-106.
33. Benenati J, Shlansky-Goldberg R, Meglin A, Seidl E. Thrombolytic and Antiplatelet Therapy in Peripheral Vascular Disease with Use of Reteplase and/or Abciximab: The SCVIR Consultants' Conference; May 22, 2000; Orlando, FL. *J Vasc Interv Radiol* 2001;12:795-805.
34. Bjarnason H, Kruse JR, Asinger DA et al. Iliofemoral deep venous thrombosis: safety and efficacy outcome during 5 years of catheter-directed thrombolytic therapy. *J Vasc Interv Radiol* 1997;8:405-418.
35. Grossman C, McPherson S. Safety and efficacy of catheter-directed thrombolysis for iliofemoral venous thrombosis. *AJR Am.J.Roentgenol.* 1999;172:667-672.
36. Patel NH, Stookey KR, Ketcham DB, Cragg AH. Endovascular Management of Acute Extensive Iliofemoral Deep Venous Thrombosis Caused by May-Thurner Syndrome. *J Vasc Interv Radiol* 2000;11:1297-1302.
37. Grunwald MR, Hofmann LV. Comparison of Urokinase, Alteplase, and Reteplase for Catheter-directed Thrombolysis of Deep Venous Thrombosis. *J Vasc Interv Radiol* 2004;15:347-352.
38. Mewissen MW, Seabrook GR, Meissner MH et al. Catheter-directed thrombolysis for lower extremity deep venous thrombosis: report of a national multicenter registry. *Radiology* 1999;211:39-49.
39. Comerota AJ, Throm RC, Mathias SD, Haughton S, Mewissen M. Catheter-directed thrombolysis for iliofemoral deep venous thrombosis improves health-related quality of life. *J.Vasc.Surg.* 2000;32:130-137.
40. Elsharawy M, Elzayat E. Early results of thrombolysis vs anticoagulation in iliofemoral venous thrombosis. A

- 1  
2  
3 randomised clinical trial. *Eur.J.Vasc.Endovasc.Surg.* 2002;24:209-214.  
4  
5 41. Cho JS, Martelli E, Mozes G, Miller V, Gloviczki P. Effects of thrombolysis and venous thrombectomy on valvular  
6 competence, thrombogenicity, venous wall morphology, and function. *J Vasc Surg* 1998;28:787-799.  
7  
8 42. Rhodes(a) J, Cho JS, Gloviczki P et al. Thrombolysis for experimental deep venous thrombosis maintains valvular  
9 competence and vasoreactivity. *J Vasc Surg* 2000;31:1193-1205.  
10  
11 43. Villalta S, Prandoni P, Cogo A et al. The utility of non-invasive tests for detection of previous proximal-vein  
12 thrombosis. *Thromb.Haemost.* 1995;73:592-596.  
13  
14 44. Baker SR, Burnand KG, Sommerville KM et al. Comparison of venous reflux assessed by duplex scanning and  
15 descending phlebography in chronic venous disease. *The Lancet* 1993;341:400-403.  
16  
17 45. Gaitini D, Torem S, Pery M, Kaftori JK. Image-directed Doppler ultrasound in the diagnosis of lower-limb venous  
18 insufficiency. *J Clin.Ultrasound* 1994;22:291-297.  
19  
20 46. Magnusson M, Kalebo P, Lukes P, Sivertsson R, Risberg B. Colour Doppler ultrasound in diagnosing venous  
21 insufficiency. A comparison to descending phlebography. *Eur.J Vasc Endovasc.Surg* 1995;9:437-443.  
22  
23 47. Mantoni M, Larsen L, Lund JO et al. Evaluation of chronic venous disease in the lower limbs: comparison of five  
24 diagnostic methods. *Br J Radiol* 2002;75:578-583.  
25  
26 48. Rutherford R, Padberg F, Comerota A et al. Venous severity scoring: An adjunct to venous outcome assessment. *J*  
27 *Vasc Surg* 2000;31:1307-1312.  
28  
29 49. Eklof B, Rutherford RB, Bergan JJ et al. Revision of the CEAP classification for chronic venous disorders: Consensus  
30 statement. *Journal of Vascular Surgery* 2004;40:1248-1252.  
31  
32 50. Fraser JD, Anderson DR. Deep Venous Thrombosis: Recent Advances and Optimal Investigation with US. *Radiology*  
33 1999;211:9-24.  
34  
35 51. Sarin S, Sommerville K, Farrah J, Scurr JH, Coleridge Smith PD. Duplex ultrasonography for assessment of venous  
36 valvular function of the lower limb. *Br J Surg.* 1994;81:1591-1595.  
37  
38 52. Labropoulos N, Tiongson J, Pryor L et al. Definition of venous reflux in lower-extremity veins. *Journal of Vascular*  
39 *Surgery* 2003;38:793-798.  
40  
41 53. Coleridge-Smith P, Labropoulos N, Partsch H et al. Duplex Ultrasound Investigation of the Veins in Chronic Venous  
42 Disease of the Lower Limbs--UIP Consensus Document. Part I. Basic Principles. *European Journal of Vascular and*  
43 *Endovascular Surgery*;In Press, Corrected Proof:  
44  
45 54. Strandén E, Laerum F. [Plethysmographic diagnosis of deep vein thrombosis]. *Tidsskr.Nor Laegeforen.*  
46 1982;102:321-323.  
47  
48 55. Nicolaides AN. Investigation of Chronic Venous Insufficiency : A Consensus Statement. *Circulation* 2000;102:126e-  
49 163.  
50  
51  
52  
53  
54  
55  
56  
57  
58  
59  
60

1  
2  
3  
4  
5  
6  
7  
8  
9  
10  
11  
12  
13  
14  
15  
16  
17  
18  
19  
20  
21  
22  
23  
24  
25  
26  
27  
28  
29  
30  
31  
32  
33  
34  
35  
36  
37  
38  
39  
40  
41  
42  
43  
44  
45  
46  
47  
48  
49  
50  
51  
52  
53  
54  
55  
56  
57  
58  
59  
60

For peer review only

## Appendix 1

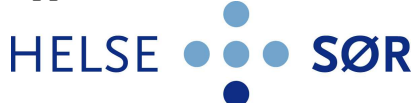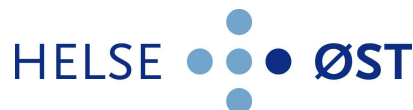

## FORESPØRSEL OM Å DELTA I EN FORSKNINGSSTUDIE:

*CaVenT-studien – kateterbasert trombolyse ved akutt dyp venetrombose*

Denne forespørselen om å delta i forskningsprosjektet ”CaVenT” går til pasienter som legges inn med akutt blodpropp i lår- og bekkenener ved sykehus i Helseregion Sør og Øst.

**Du bestemmer selv**

Det er frivillig å delta i studien. Dersom du velger å ikke delta, trenger du ikke oppgi noen grunn for dette. Dersom du ikke ønsker å delta i studien, vil behandlingen din være den vanlige behandlingen som pasienter med din sykdom mottar. Du kan når som helst trekke deg underveis uten begrunnelse.

**Bakgrunn**

Undersøkelsene viser at du har fått en blodpropp i en samleblodåre (vene) i låret og/eller i bekkenet. Tilstanden kalles dyp venetrombose. Standardbehandlingen ved akutt dyp venetrombose er blodfortynnende medisin, først sprøyter med lavmolekylært heparin (inneholder legemidlene Fragmin eller Klexane) i 4-8 dager og deretter tabletter (legemidlet Marevan) i minst 3-6 måneder. Målet med behandlingen er å stoppe utviklingen av blodproppen, forhindre at blodproppen løsner og går til lungene og å redusere plagsomme senfølger i form av smerter, hevelse og hudforandringer. Slike senfølger kalles posttrombotisk syndrom. Om lag en fjerdedel av pasientene utvikler posttrombotisk syndrom i løpet av de første 2 årene etter standardbehandling for blodpropp.

De siste årene er det utviklet en ny behandling for å løse opp blodpropp som kalles kateterbasert trombolyse. Behandlingen er beskrevet i detalj under. Foreløpige resultater tyder på at denne behandlingen kan løse opp blodproppen raskere og forebygge senplagene, men så langt har det ikke vært gjennomført studier som kan gi gode svar på dette.

**Prosjektets formål**

Hensikten med dette forskningsprosjektet er å avklare om tilleggsbehandling med kateterbasert trombolyse gir bedre resultat i akutt fase og færre plager på lang sikt uten økt risiko for bivirkninger sammenliknet med standard blodfortynnende medisin alene.

**Om kateterbasert trombolyse/blodproppløsende behandling**

Behandlingen gjennomføres i samarbeid mellom hematologisk/indremedisinsk avdeling og røntgenavdelingen. Selve prosedyren blir utført ved røntgenavdelingen. Du får først lokalbedøvelse. Deretter fører vi inn et 2 mm tykt plastrør i venen (blodåren) i knehasen og inn i selve blodproppen. Så gir vi kontinuerlig en lav dose av et blodproppløsende medikament (legemidlet Actilyse) gjennom plastrøret i inntil 3-4 dager. Samtidig gir vi også en lav dose blodfortynnende medisin (legemidlet heparin) som drypp intravenøst. Blodproppen løser seg langsomt opp, og tidspunktet for å avslutte behandlingen blir bestemt ut fra daglige kontroller med røntgen kontrastundersøkelse. Mens behandlingen pågår må man holde sengen.

Dersom det i forløpet av behandlingen påvises en unormal blodåre (vene), oftest en medfødt innsnevring, som kan forklare hvorfor blodpropp oppsto, vil vi vurdere å gi tilleggsbehandling ved å

1  
2  
3 utvide blodåren ved hjelp av et ballongkateter, eventuelt legge inn en stent (forsterkning). Dette vil sikre  
4 normal blodstrøm etter behandlingen.

5  
6 Behandling med blodpropp-oppløsning utføres ved flere av de store sykehusene i regionen, og dersom  
7 ditt sykehus ikke kan utføre behandlingen, vil du bli overført til et av disse.

8  
9  
10 Etter avsluttet kateterbasert behandling vil du få vanlig behandling med lavmolekylært heparin og  
11 Marevan og bli fulgt opp etter gjeldende retningslinjer ved ditt lokalsykehus.

## 12 13 14 **Gjennomføring**

15 For å kunne gjøre en vitenskapelig sammenlikning av resultatene, vil det bli foretatt en trekning slik at  
16 halvparten av pasientene vil få standard behandling, mens den andre halvparten vil få kateterbasert  
17 trombolysse i tillegg. Du gis skriftlig og muntlig informasjon om forskningsprosjektet når du legges inn.

18  
19  
20 Deltagelse i studien medfører i tillegg til vanlig behandling og oppfølging, ekstra samtaler med lege  
21 (noen som telefonkonsultasjon) og enkelte undersøkelser (ultralyd, blodprøver) ved ulike tidspunkt i de  
22 påfølgende 2 år. Uansett behandling vil vi kontakte deg regelmessig, enten per telefon (etter 12, 36 og  
23 48 måneder) eller ved kontrollundersøkelse (etter 6, 24 og 60 måneder). Undersøkelsene omfatter  
24 ultralydundersøkelse og blodprøver.

## 25 26 27 **Risiko ved behandlingen**

28 Kateterbasert trombolysse medfører en litt økt risiko for blødning sammenliknet med den vanlige  
29 behandlingen. Det vanligste er mindre blødning ved innstikksstedet der plastrøret er lagt inn. Hos noen  
30 få pasienter har det vært rapportert blødninger andre steder, mest alvorlig er blødninger i tarm og hode.  
31 Dersom slik blødning oppstår, vil vi stoppe den trombolytiske behandlingen og sette i gang tiltak for å  
32 behandle blødningen etter gjeldende rutiner ved sykehusene.

## 33 34 35 **Blodprøver og biobank**

36 Blodprøvene som blir tatt og informasjonen utledet av dette materialet vil bli lagret i en såkalt  
37 "forskningsbiobank" ved Ullevål universitetssykehus HF. Hvis du sier ja til å delta i studien, gir du også  
38 samtykke til at det biologiske materialet og analyseresultater inngår i biobanken. Blodprøvene vil bli  
39 lagret i fryseboks ved hematologisk forskningslaboratorium i tråd med interne retningslinjer.  
40 Viseadministrerende direktør ved sykehuset er ansvarlig for biobanken. Biobanken planlegges å vare til  
41 2027. Etter dette vil materiale og opplysninger bli destruert/slettet etter interne retningslinjer.

## 42 43 44 **Slik ivaretas dine prøver og personopplysninger**

45 Personvernet ivaretas i samsvar med betingelser gitt i konsesjon fra Datatilsynet/melding til sykehusets  
46 personvernombud. Forskningsdata, inklusive opplysninger utledet av det biologiske materialet, lagres på  
47 eget, sikret datasystem ved sykehuset. Alle opplysningene vil bli behandlet konfidensielt. I prosjektet  
48 har du et prosjektnummer som knytter deg som person til prosjektet gjennom en adresseliste. Kun  
49 prosjektansvarlig har adgang til adresselisten.



## Hvem som har vurdert prosjektet

Regional komité for medisinsk forskningsetikk, Øst-Norge, har vurdert prosjektet, og har ingen innvendinger mot at det gjennomføres. Forskningsbiobanken er meldt til Sosial- og helsedirektoratet, som ikke har innsigelser til opprettelse av biobanken.

## Økonomi

Forskningsprosjektet er et samarbeid mellom sykehusavdelinger i Helse Sør og Øst. Prosjektet er delvis finansiert gjennom forskningsmidler fra Helse Øst. Det er ikke aktuelt å samarbeide med industri, og det er heller ikke aktuelt med kommersialisering av produkter. Prosjektansvarlig og andre som arbeider med prosjektet har ingen form for økonomisk vinning knyttet til prosjektet.

## Dine rettigheter

Hvis du sier ja til å delta i studien, har du rett til å få innsyn i hvilke opplysninger som er registrert om deg. Du har videre rett til å få korrigert evt. feil i de opplysningene vi har registrert. Hvis du senere trekker deg fra studien, kan du kreve at materialet destrueres. Du kan også kreve å få slettet opplysninger vi har registrert. Ved henvendelse til prosjektansvarlig kan du få nærmere opplysninger om dette. Du kan ikke få slettet opplysninger eller destruert materiale dersom de er anonymisert, er viderebehandlet og inngår i et annet biologisk produkt eller dersom opplysningene allerede har inngått i et vitenskapelig arbeid. Adgangen til destruksjon gjelder heller ikke dersom det ved lov er fastsatt at materialet eller opplysningene skal oppbevares.

## Prosjektansvarlig – mer informasjon

Dersom du har flere spørsmål om studien eller biobanken kan du kontakte en av de prosjektansvarlige legene (se under) eller legen som er ansvarlig for oppfølging ved ditt sykehus (se under).

-----  
Per Morten Sandset  
Avd. overlege, professor, dr. med  
Prosjektansvarlig  
Hematologisk avdeling, UUS

-----  
Nils Einar Kløw  
Seksjonsoverlege, professor, dr. med  
Hjerte- og karradiologisk avdeling, UUS

-----  
Tone Enden  
Lege, stipendiat  
Prosjektleder, UUS  
Tlf UUS 22 11 80 80, calling nr. 581 78389  
e-mail: [tone.enden@uus.no](mailto:tone.enden@uus.no)

Prosjektansvarlig lege ved ditt sykehus er:

Navn:  
Tittel:  
Adresse:  
Telefon:

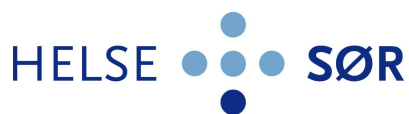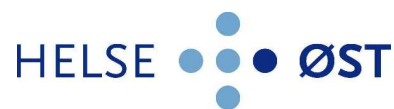

## CaVenT-studien

### Samtykke – prosjektdeltaker

Deltakelse i studien er basert på ditt frivillige, informerte samtykke. Dersom du ønsker informasjon utover det som framkommer i dette informasjonsskrivet og den muntlige informasjonen du har mottatt/vil få, har du full anledning til å be om dette.

Dersom du etter å ha fått den informasjon du synes er nødvendig, sier ja til å delta i studien, må du signere samtykkeerklæringen.

Jeg, \_\_\_\_\_ (navn med blokkbokstaver), bekrefter at jeg har mottatt skriftlig informasjon om studien, har fått anledning til å innhente den informasjon jeg har hatt behov for, og er villig til å delta i prosjektet.

Signatur \_\_\_\_\_ Dato \_\_\_\_\_  
(sign. prosjektdeltaker) (datert av prosjektdeltaker)

Informasjon om studien er gitt av:

Lege, \_\_\_\_\_ (navn med blokkbokstaver)

Signatur \_\_\_\_\_ Dato \_\_\_\_\_  
(sign. lege)

## Appendix 2: VEINES-QoL and EQ-D5

**Spørreskjema om helse**

Opplysningene vil være til hjelp for å holde rede på hvordan du har det, og om hvordan du klarer å utføre dine vanlige aktiviteter.

Vis hvilke utsagn som passer best på **din helsetilstand i dag** ved å sette et kryss i en av rutene utenfor hver av gruppene nedenfor.

**Gange**

Jeg har ingen problemer med å gå omkring.

Jeg har litt problemer med å gå omkring.

Jeg er sengeliggende.

**Personlig stell**

Jeg har ingen problemer med personlig stell.

Jeg har litt problemer med å vaske meg eller kle meg.

Jeg er ute av stand til å vaske meg eller kle meg.

**Vanlige gjøremål** (*f.eks. arbeid, studier, husarbeid, familie- eller fritidsaktiviteter*).

Jeg har ingen problemer med å utføre mine vanlige gjøremål

Jeg har litt problemer med å utføre mine vanlige gjøremål.

Jeg er ute av stand til å utføre mine vanlige gjøremål.

**Smerte/ubehag**

Jeg har verken smerte eller ubehag.

Jeg har moderat smerte eller ubehag.

Jeg har sterk smerte eller ubehag.

**Angst/depresjon**

Jeg er verken engstelig eller deprimert.

Jeg er noe engstelig eller deprimert.

Jeg er svært engstelig eller deprimert.

Besvar hvert spørsmål nedenfor ved å krysse av svaret som angitt. Hvis du er usikker på hva du skal svare, vennligst svar etter beste evne.

Disse spørsmålene er om din oppfatning av **beina dine**.

1. I løpet av de 4 siste ukene, hvor ofte har du hatt noen av disse plagene i beina?

| (Sett ett kryss på hver linje)   | Daglig                                | Flere ganger i uka                    | Omtrent én gang i uka                 | Sjeldnere enn én gang i uka           | Aldri                                 |
|----------------------------------|---------------------------------------|---------------------------------------|---------------------------------------|---------------------------------------|---------------------------------------|
| 1. Tunge bein                    | <input type="checkbox"/> <sub>1</sub> | <input type="checkbox"/> <sub>2</sub> | <input type="checkbox"/> <sub>3</sub> | <input type="checkbox"/> <sub>4</sub> | <input type="checkbox"/> <sub>5</sub> |
| 2. Vondt i beina                 | <input type="checkbox"/> <sub>1</sub> | <input type="checkbox"/> <sub>2</sub> | <input type="checkbox"/> <sub>3</sub> | <input type="checkbox"/> <sub>4</sub> | <input type="checkbox"/> <sub>5</sub> |
| 3. Hevelse                       | <input type="checkbox"/> <sub>1</sub> | <input type="checkbox"/> <sub>2</sub> | <input type="checkbox"/> <sub>3</sub> | <input type="checkbox"/> <sub>4</sub> | <input type="checkbox"/> <sub>5</sub> |
| 4. Kramper om natta              | <input type="checkbox"/> <sub>1</sub> | <input type="checkbox"/> <sub>2</sub> | <input type="checkbox"/> <sub>3</sub> | <input type="checkbox"/> <sub>4</sub> | <input type="checkbox"/> <sub>5</sub> |
| 5. Varme eller brennende følelse | <input type="checkbox"/> <sub>1</sub> | <input type="checkbox"/> <sub>2</sub> | <input type="checkbox"/> <sub>3</sub> | <input type="checkbox"/> <sub>4</sub> | <input type="checkbox"/> <sub>5</sub> |
| 6. Urolige bein                  | <input type="checkbox"/> <sub>1</sub> | <input type="checkbox"/> <sub>2</sub> | <input type="checkbox"/> <sub>3</sub> | <input type="checkbox"/> <sub>4</sub> | <input type="checkbox"/> <sub>5</sub> |
| 7. Banking                       | <input type="checkbox"/> <sub>1</sub> | <input type="checkbox"/> <sub>2</sub> | <input type="checkbox"/> <sub>3</sub> | <input type="checkbox"/> <sub>4</sub> | <input type="checkbox"/> <sub>5</sub> |
| 8. Kløe                          | <input type="checkbox"/> <sub>1</sub> | <input type="checkbox"/> <sub>2</sub> | <input type="checkbox"/> <sub>3</sub> | <input type="checkbox"/> <sub>4</sub> | <input type="checkbox"/> <sub>5</sub> |
| 9. Prikking                      | <input type="checkbox"/> <sub>1</sub> | <input type="checkbox"/> <sub>2</sub> | <input type="checkbox"/> <sub>3</sub> | <input type="checkbox"/> <sub>4</sub> | <input type="checkbox"/> <sub>5</sub> |

2. Når på dagen er **plagene i beina** mest uttalte? (Sett ett kryss)

- |                                                           |                                                                      |
|-----------------------------------------------------------|----------------------------------------------------------------------|
| <input type="checkbox"/> <sub>1</sub> Når jeg våkner      | <input type="checkbox"/> <sub>4</sub> Om natta                       |
| <input type="checkbox"/> <sub>2</sub> Midt på dagen       | <input type="checkbox"/> <sub>5</sub> Når som helst i løpet av dagen |
| <input type="checkbox"/> <sub>3</sub> På slutten av dagen | <input type="checkbox"/> <sub>6</sub> Aldri                          |

3. Sammenlignet med for ett år siden, hvordan vil du vurdere dine **plager i beina nå**? (Sett ett kryss)

- |                                                                                 |                                                                             |
|---------------------------------------------------------------------------------|-----------------------------------------------------------------------------|
| <input type="checkbox"/> <sub>1</sub> Mye bedre nå enn for ett år siden         | <input type="checkbox"/> <sub>4</sub> Noe verre nå enn for ett år siden     |
| <input type="checkbox"/> <sub>2</sub> Noe bedre nå enn for ett år siden         | <input type="checkbox"/> <sub>5</sub> Mye verre nå enn for ett år siden     |
| <input type="checkbox"/> <sub>3</sub> Omtrent det samme nå som for ett år siden | <input type="checkbox"/> <sub>6</sub> Jeg hadde ingen plager i beina i fjor |

4. Følgende spørsmål gjelder daglige aktiviteter. Setter **plagene i beina** begrensninger for dine daglige aktiviteter? Hvis « ja », i hvilken grad?

| (Sett ett kryss på hver linje)                                                    | Jeg jobber ikke            | JA, begrenser meg mye      | JA, begrenser meg litt     | NEI, begrenser meg ikke    |
|-----------------------------------------------------------------------------------|----------------------------|----------------------------|----------------------------|----------------------------|
| a. Daglige aktiviteter på jobb.                                                   | <input type="checkbox"/> 0 | <input type="checkbox"/> 1 | <input type="checkbox"/> 2 | <input type="checkbox"/> 3 |
| b. Daglige aktiviteter hjemme (husarbeid, småjobber, hagearbeid, o.l.)            |                            | <input type="checkbox"/> 1 | <input type="checkbox"/> 2 | <input type="checkbox"/> 3 |
| c. Fritidsaktiviteter hvor du må <u>stå</u> lenge (selskap, ta buss, handle o.l.) |                            | <input type="checkbox"/> 1 | <input type="checkbox"/> 2 | <input type="checkbox"/> 3 |
| d. Fritidsaktiviteter hvor du må <u>sitte</u> lenge (kino, teater, på reise o.l.) |                            | <input type="checkbox"/> 1 | <input type="checkbox"/> 2 | <input type="checkbox"/> 3 |

5. 3. I løpet av de 4 siste ukene, har du hatt noen av disse problemene i jobb eller i daglige aktiviteter på grunn av **plagene i beina**?

(Sett ett kryss på hver linje)

|                                                                                                           | JA                         | NEI                        |
|-----------------------------------------------------------------------------------------------------------|----------------------------|----------------------------|
| a. Redusert arbeidstid eller tid til andre aktiviteter                                                    | <input type="checkbox"/> 1 | <input type="checkbox"/> 2 |
| b. Gjennomført mindre enn du skulle ønsket                                                                | <input type="checkbox"/> 1 | <input type="checkbox"/> 2 |
| c. Blitt begrenset i type jobb eller aktiviteter                                                          | <input type="checkbox"/> 1 | <input type="checkbox"/> 2 |
| d. Hatt vanskeligheter med å utføre jobben eller andre aktiviteter (f eks det krevde større anstrengelse) | <input type="checkbox"/> 1 | <input type="checkbox"/> 2 |

6. I løpet av de 4 siste ukene, i hvilken grad har **plagene i beina** kommet i veien for samvær med familie, venner, naboer eller grupper? (Sett ett kryss)

- |                                                 |                                        |
|-------------------------------------------------|----------------------------------------|
| <input type="checkbox"/> 1 Ikke i det hele tatt | <input type="checkbox"/> 4 Ganske stor |
| <input type="checkbox"/> 2 Lett                 | <input type="checkbox"/> 5 Svær        |
| <input type="checkbox"/> 3 Moderat              |                                        |

7. Hvor mye smerter har du hatt i beina i løpet av de 4 siste ukene? (sett ett kryss)

- |                                       |                                      |
|---------------------------------------|--------------------------------------|
| <input type="checkbox"/> 1 Ingen      | <input type="checkbox"/> 4 Moderat   |
| <input type="checkbox"/> 2 Svært lite | <input type="checkbox"/> 5 Mye       |
| <input type="checkbox"/> 3 Lite       | <input type="checkbox"/> 6 Svært mye |

8. Disse spørsmålene er om hvordan du føler deg, og om hvordan du har hatt det de siste 4 ukene som følge av plagene i beina. For hvert spørsmål, kryss av for det svaret som passer best med hvordan du har følt deg. Hvor mye i løpet av de 4 siste ukene-

| (Sett ett kryss på hver linje) | Hele tiden | Det meste av tiden | Ganske ofte | Av og til | Sjelden | Aldri |
|--------------------------------|------------|--------------------|-------------|-----------|---------|-------|
|                                |            |                    |             |           |         |       |

|   |    |                                                                |                                       |                                       |                                       |                                       |                                       |                                       |
|---|----|----------------------------------------------------------------|---------------------------------------|---------------------------------------|---------------------------------------|---------------------------------------|---------------------------------------|---------------------------------------|
| 1 | a. | har du vært bekymret for hvordan beina dine ser ut?            | <input type="checkbox"/> <sub>1</sub> | <input type="checkbox"/> <sub>2</sub> | <input type="checkbox"/> <sub>3</sub> | <input type="checkbox"/> <sub>4</sub> | <input type="checkbox"/> <sub>5</sub> | <input type="checkbox"/> <sub>6</sub> |
| 2 | b. | har du følt deg irritabel                                      | <input type="checkbox"/> <sub>1</sub> | <input type="checkbox"/> <sub>2</sub> | <input type="checkbox"/> <sub>3</sub> | <input type="checkbox"/> <sub>4</sub> | <input type="checkbox"/> <sub>5</sub> | <input type="checkbox"/> <sub>6</sub> |
| 3 | c. | har du følt at du har vært til byrde for familie eller venner? | <input type="checkbox"/> <sub>1</sub> | <input type="checkbox"/> <sub>2</sub> | <input type="checkbox"/> <sub>3</sub> | <input type="checkbox"/> <sub>4</sub> | <input type="checkbox"/> <sub>5</sub> | <input type="checkbox"/> <sub>6</sub> |
| 4 | d. | har du vært bekymret for å skumpe bort ting?                   | <input type="checkbox"/> <sub>1</sub> | <input type="checkbox"/> <sub>2</sub> | <input type="checkbox"/> <sub>3</sub> | <input type="checkbox"/> <sub>4</sub> | <input type="checkbox"/> <sub>5</sub> | <input type="checkbox"/> <sub>6</sub> |
| 5 | e. | har dine beins utseende påvirket ditt klesvalg ?               | <input type="checkbox"/> <sub>1</sub> | <input type="checkbox"/> <sub>2</sub> | <input type="checkbox"/> <sub>3</sub> | <input type="checkbox"/> <sub>4</sub> | <input type="checkbox"/> <sub>5</sub> | <input type="checkbox"/> <sub>6</sub> |

Vennligst oppgi dato for utfyllingen: \_\_\_\_/\_\_\_\_/\_\_\_\_ (dag/måned/år)
